# Supplementary material for: Species-specific variation in nesting and postfledging resource selection for two forest breeding migrant songbirds
Source: PLoS One. 2017 Jun 14;12(6):e0179524. doi: 10.1371/journal.pone.0179524 (PMC5470712; doi:10.1371/journal.pone.0179524)
Supplement: S1 Dataset — (XLSX) [file pone.0179524.s001.xlsx]

## Sheet: ovenNest
id	use	year	speciescode	canopy	UnderFoliage	AveLL	saplingSH	polesSH	sawSH	edgeDist
1	1	2014	2	92.46	45	2.66	811.953	40.0965	87.8648	95.5352
1	0	2014	2	94.02	57.5	1.74	0	145.473	138.003	254.744
1	0	2014	2	90.12	53.25	2.34	0	270.201	113.557	89.5091
2	1	2014	2	97.92	23.5	2.2	202.988	294.841	133.719	195.027
2	0	2014	2	96.88	13.25	1.2	1053.53	0	102.874	184.281
2	0	2014	2	94.28	40.25	1.6	811.953	60.3932	101.134	215.294
3	1	2014	2	93.5	19.25	3.2	495.292	504.483	23.9283	23.1112
3	0	2014	2	98.44	74	1.8	838.11	268.227	43.2882	79.6098
3	0	2014	2	92.2	49.5	2.22	653.171	0	73.1976	20.1658
4	1	2014	2	97.14	11.25	2	1942.37	46.7685	83.7438	192.789
4	0	2014	2	90.38	4.25	3.2	659.712	347.535	213.089	170.818
4	0	2014	2	96.88	4	0.06	3653.79	66.2819	169.099	216.822
5	1	2014	2	92.98	30.25	2.6	1014.94	0	74.6659	201.666
5	0	2014	2	95.84	16.5	1.4	360.868	66.2819	72.3879	166.702
5	0	2014	2	91.68	54.5	1.6	0	0	104.98	241.026
6	1	2014	2	96.62	90.75	2.4	2029.88	232.471	41.9397	220.471
6	0	2014	2	96.62	107.75	1.4	957.405	172.961	142.914	164.801
6	0	2014	2	94.8	65.25	2.2	596.537	234.025	65.0548	228.165
7	1	2014	2	91.68	81	1.8	0	90.0086	159.081	190.008
7	0	2014	2	95.32	22.25	3.1	0	101.143	124.603	244.865
7	0	2014	2	96.62	29	2.4	0	55.2558	163.363	237.879
8	1	2014	2	93.76	42.25	5	292.303	263.382	86.7743	282.857
8	0	2014	2	94.54	136.25	3.7	456.724	128.332	73.9358	244.328
8	0	2014	2	94.54	48.5	3	2626.42	129.913	204.199	294.598
9	1	2014	2	90.38	66.75	2.48	0	172.961	152.332	295.688
9	0	2014	2	88.04	79.5	2.88	0	255.621	127.061	324.504
9	0	2014	2	84.14	112	2.96	0	154.277	82.0624	353.215
10	1	2014	2	98.96	30.75	1	1256.51	114.181	90.9492	251.999
10	0	2014	2	94.28	36.25	0.8	0	111.14	49.0486	205.32
10	0	2014	2	100	43.75	1.8	1130.41	135.449	95.389	1.85872
11	1	2014	2	88.82	110.5	3.2	0	0	149.397	395.684
11	0	2014	2	90.38	73.5	2.14	360.868	0	100.198	373.679
11	0	2014	2	90.64	43.5	6.64	0	0	51.5543	362.266
12	1	2014	2	83.36	93	2.64	596.537	123.433	91.9972	188.469
12	0	2014	2	84.92	135.5	1.4	596.537	40.0965	127.472	196.686
12	0	2014	2	38.64	87	1.16	0	50.7471	71.1248	151.536
13	1	2014	2	98.44	75.25	3.55	241.573	163.919	307.971	67.6076
13	0	2014	2	96.62	69.75	2.65	0	60.3932	54.7312	106.399
13	0	2014	2	98.7	25.75	2.8	0	148.793	149.264	103.257
14	1	2014	2	92.46	135.75	4.28	0	0	88.4892	66.8213
14	0	2014	2	92.72	145.5	2.4	1826.9	66.2819	188.211	76.4395
14	0	2014	2	96.1	132.75	1.54	0	0	43.4435	62.8073
15	1	2014	2	97.4	84.5	3.9	0	55.2558	143.449	92.0398
15	0	2014	2	93.5	46	2.06	1169.21	0	202.397	59.1582
15	0	2014	2	97.92	70	2.66	957.405	204.398	0	102.092
16	1	2014	2	92.98	18.5	2.6	0	0	77.993	142.803
16	0	2014	2	90.12	14.5	0	292.303	172.961	27.9319	194.829
16	0	2014	2	90.38	46	2.6	456.724	90.2171	69.5014	172.33
17	1	2014	2	93.24	35.75	4	0	50.7471	58.6181	222.031
17	0	2014	2	94.8	23.5	1.4	1053.26	60.3932	87.8857	186.198
17	0	2014	2	89.6	34.5	3.2	0	0	139.457	191.378
18	1	2014	2	95.84	22.25	3.2	1079.68	43.2401	134.256	289.11
18	0	2014	2	95.58	30.75	2.9	1053.53	0	146.481	253.896
18	0	2014	2	97.14	15.75	2.3	495.292	101.143	92.593	249.811
19	1	2014	2	98.44	26.5	2	495.292	577.858	73.7033	423.024
19	0	2014	2	99.48	0.5	1.2	862.701	90.0086	27.1215	413.882
19	0	2014	2	98.7	29.75	0.8	0	339.44	106.853	457.944
20	1	2014	2	95.58	30.75	2.2	2541.41	0	108.993	66.9197
20	0	2014	2	97.14	8	3	0	0	174.634	35.5466
20	0	2014	2	94.54	8.75	3.4	360.868	102.024	58.326	59.1713
21	1	2014	2	98.44	19.75	1.2	0	46.7685	28.3544	194.631
21	0	2014	2	97.92	70.25	0.8	360.868	40.0965	36.6849	221.163
21	0	2014	2	95.06	4.25	1.4	456.724	0	26.8414	174.874
22	1	2014	2	94.54	16.5	1.2	360.868	221.929	41.5048	219.664
22	0	2014	2	97.14	7.75	1.8	0	50.7471	52.248	198.278
22	0	2014	2	97.92	18.25	1.1	292.303	192.241	110.898	179.512
23	1	2014	2	94.02	121	2.8	2423.43	150.61	101.249	9.6548
23	0	2014	2	87.52	31.5	1	0	121.067	80.9819	13.611
23	0	2014	2	43.06	24.75	0	0	0	23.8615	3.78514
24	1	2014	2	94.02	32	1.2	584.607	512.401	182.554	251.085
24	0	2014	2	98.18	65	1.7	838.11	0	163.561	216.606
24	0	2014	2	96.36	32.5	1.5	584.607	149.134	75.2406	274.726
25	1	2014	2	96.62	20.25	1.2	653.171	73.0758	72.9202	286.977
25	0	2014	2	95.06	25.5	1.8	0	101.143	116.685	300.024
25	0	2014	2	88.04	1.75	2.4	0	0	95.0987	330.303
26	1	2014	2	98.44	125.5	5.3	2577.7	0	92.7473	178.76
26	0	2014	2	98.44	93.75	2.34	0	0	172.911	166.466
26	0	2014	2	90.64	135.25	3.2	241.573	0	79.379	152.923
27	1	2014	2	98.96	79	3.3	2702.9	0	111.185	149.086
27	0	2014	2	99.22	95.75	2.52	2423.43	0	174.05	115.246
27	0	2014	2	97.66	49.75	4.02	0	43.2401	68.2109	162.509
28	1	2014	2	98.44	108.5	4.28	360.868	385.013	163.943	44.9622
28	0	2014	2	97.66	149.25	2.26	0	0	120.738	65.0962
28	0	2014	2	97.92	94.75	3.16	0	0	60.6871	92.4917
29	1	2014	2	98.18	94.75	3.62	0	172.961	139.563	107.136
29	0	2014	2	97.4	125.75	3.62	292.303	0	152.651	65.1829
29	0	2014	2	98.44	163.75	2.8	241.573	180.66	180.386	70.05
30	1	2014	2	85.18	34	1.54	2933.18	214.439	32.4781	149.77
30	0	2014	2	87.78	54.5	2.26	1452.7	623.195	13.2324	110.418
30	0	2014	2	85.44	65	3.24	2282.73	140.964	37.2474	185.72
31	1	2015	2	88.3	27.75	2	811.953	149.134	104.374	99.0124
31	0	2015	2	83.36	22.25	3.3	957.405	0	85.5595	89.6576
31	0	2015	2	87.26	37.75	0.76	0	156.399	99.9052	147.001
32	1	2015	2	92.98	52	3.2	952.015	458.235	57.5262	6.84649
32	0	2015	2	95.06	83.5	1.7	456.724	101.143	74.448	17.0162
32	0	2015	2	98.18	41.5	3.7	2058.05	215.324	0	70.0162
33	1	2015	2	97.14	139.25	3.4	0	0	155.425	255.513
33	0	2015	2	96.1	82.25	4.5	0	0	177.309	287.938
33	0	2015	2	98.44	62	2	4772.3	93.537	55.7258	240.059
34	1	2015	2	96.1	58.5	2.7	0	136.226	60.1547	211.901
34	0	2015	2	91.42	158.75	2.5	241.573	46.7685	206.447	219.365
34	0	2015	2	89.6	42.25	1.3	0	0	120.98	152.61
35	1	2015	2	89.08	42	4.5	0	0	199.155	78.7833
35	0	2015	2	97.14	10.6667	1.5	0	259.825	74.861	43.4456
35	0	2015	2	97.66	64.5	3.2	811.953	0	182.763	34.1096
36	1	2015	2	93.76	34.25	1.8	0	250.278	119.347	92.6365
36	0	2015	2	89.86	34.75	5.1	0	150.61	130.691	146.402
36	0	2015	2	93.5	135	2.5	0	0	175.638	125.819
37	1	2015	2	92.72	64	2.4	0	238.251	172.218	268.645
37	0	2015	2	95.06	82.75	1.3	0	55.2558	87.1234	299.031
37	0	2015	2	99.22	57.75	1.5	0	148.793	256.696	249.795
38	1	2015	2	90.38	129.25	3.4	0	133.634	74.1826	288.485
38	0	2015	2	90.64	115.25	2.6	0	353.587	230.971	305.996
38	0	2015	2	83.88	104.5	4.9	241.573	305.533	90.8319	267.164
39	1	2015	2	87	58	0.9	811.953	0	142.377	60.9298
39	0	2015	2	79.46	27.25	1.2	405.977	246.616	76.4835	65.1617
39	0	2015	2	55.8	51.25	0.6	0	260.759	169.673	65.1617
40	1	2015	2	88.56	48.75	0.9	0	137.612	73.3275	189.234
40	0	2015	2	85.96	30.75	1	1169.21	411.558	101.903	149.114
40	0	2015	2	84.14	35	1.2	0	358.254	84.3856	153.188
41	1	2015	2	96.88	46.5	1.5	596.537	0	80.4535	91.4915
41	0	2015	2	94.02	64	1.5	1625.94	73.0758	109.392	121.985
41	0	2015	2	93.5	19	1	721.736	216.201	198.509	28.3706
42	1	2015	2	93.24	33	1.7	456.724	46.7685	84.8336	194.81
42	0	2015	2	93.76	36	2.9	0	322.095	75.9449	165.066
42	0	2015	2	95.06	25	1.9	596.537	0	129.541	199.998
43	1	2015	2	97.92	72.75	1.4	0	285.368	187.805	217.466
43	0	2015	2	98.18	11	1.1	292.303	219.729	160.864	193.866
43	0	2015	2	99.22	7.5	1.5	241.573	40.0965	157.059	182.986
44	1	2015	2	95.06	34.5	1.6	0	146.152	126.833	165.386
44	0	2015	2	97.66	18	0.6	0	355.279	119.543	129.088
44	0	2015	2	96.36	69.5	0.7	1826.9	101.143	200.894	170.058
45	1	2015	2	97.14	53	2.8	0	93.9872	79.0987	215.042
45	0	2015	2	96.88	83.25	4.6	0	141.239	74.0967	165.952
45	0	2015	2	95.84	103.75	3.2	0	519.074	79.414	261.983
46	1	2015	2	94.28	15.25	3.4	0	266.163	88.1237	229.966
46	0	2015	2	91.94	57.75	2.2	1410.79	0	56.8712	187.366
46	0	2015	2	87.78	48	0.34	2119.2	0	149.007	186.204
47	1	2015	2	97.66	4	1.8	0	174.219	63.9426	117.446
47	0	2015	2	90.12	9.75	1.2	0	0	128.094	71.0006
47	0	2015	2	97.4	0	0.6	0	129.913	161.2	96.7468
48	1	2015	2	98.96	143.5	3	1461.52	50.7471	53.6164	3.35929
48	0	2015	2	95.58	119.25	2.4	811.953	0	189.111	48.9625
48	0	2015	2	98.18	62.75	2.1	0	0	60.1334	44.8326
49	1	2015	2	83.36	64.25	1.3	0	173.153	61.523	128.894
49	0	2015	2	89.6	78.5	2.1	2996.11	0	90.2038	143.692
49	0	2015	2	92.46	57	1.6	1169.21	0	207.155	134.197
50	1	2015	2	89.08	33.75	2.8	1172.82	172.961	107.745	294.778
50	0	2015	2	96.88	23.75	0.5	1318.27	274.103	100.407	238.264
50	0	2015	2	87.26	50	0	0	0	59.3252	270.64
51	1	2015	2	92.2	78.5	1.2	0	216.201	64.4889	110.477
51	0	2015	2	95.32	62.25	1.6	405.977	325.465	94.9242	117.828
51	0	2015	2	92.46	84.75	1	1553.94	50.7471	80.0995	149.923
52	1	2015	2	97.4	100	2.3	1104.26	133.469	77.7509	46.5618
52	0	2015	2	88.82	59.25	2.5	241.573	519.349	30.4166	3.71452
52	0	2015	2	87.78	89.75	1.9	811.953	114.181	129.914	97.0255
53	1	2015	2	97.92	149.5	2.4	1169.21	90.0086	199.015	410.693
53	0	2015	2	95.06	112.25	2.8	0	101.143	84.9071	403.695
53	0	2015	2	97.92	117.25	2.6	1625.94	73.0758	191.586	377.684

## Sheet: acflNest
id	use	year	speciescode	canopy	UnderFoliage	AveLL	saplingSH	polesSH	sawSH	edgeDist
1	1	2014	1	95.32	124.25	6.46	1461.52	0	98.282	68.0228
1	0	2014	1	97.66	80	4.94	0	196.22	68.5098	117.573
1	0	2014	1	96.88	88	5.44	292.303	114.181	75.4169	97.9889
2	1	2014	1	98.7	1.5	0.8	1629.55	365.335	86.3066	32.2299
2	0	2014	1	99.48	34.5	0	0	50.7471	58.6181	7.03679
2	0	2014	1	98.7	0	1	483.146	90.8436	138.763	65.2316
3	1	2014	1	96.88	19.75	2.2	1169.21	0	364.771	50.6488
3	0	2014	1	98.44	73.75	3.4	0	208.168	25.2857	3.10958
3	0	2014	1	98.44	2.5	3	3001.75	198.659	213.596	50.6214
4	1	2014	1	98.96	10	1.3	456.724	90.8436	300	18.0162
4	0	2014	1	96.1	91.75	1	0	0	151.134	40.3194
4	0	2014	1	98.96	93.25	0.75	811.953	0	128.357	33.8239
5	1	2014	1	95.58	2	1.4	0	129.913	130.11	265.844
5	0	2014	1	98.7	3.75	0.4	2321.94	0	46.476	248.203
5	0	2014	1	95.58	9	0.26	1477.3	223.708	176.238	258.32
6	1	2014	1	98.44	21.25	1.4	1053.26	129.913	87.4914	207.637
6	0	2014	1	97.66	18.5	2.5	2058.05	101.143	122.519	244.86
6	0	2014	1	93.24	19.5	2.8	292.303	220.13	74.459	264.636
7	1	2014	1	95.58	6.5	2.3	1826.9	40.0965	204.816	329.077
7	0	2014	1	97.14	10.5	1.8	957.405	116.316	112.494	332.206
7	0	2014	1	98.18	39	1	1169.21	66.2819	116.039	307.089
8	1	2014	1	96.1	31.5	2.6	811.953	66.2819	84.2134	141.52
8	0	2014	1	98.44	13	2	0	185.168	116.211	142.489
8	0	2014	1	98.7	10.5	1.6	0	0	0	112.378
9	1	2014	1	94.54	81.5	1.8	0	0	105.249	131.409
9	0	2014	1	98.96	14.25	2.16	811.953	0	144.467	88.7299
9	0	2014	1	97.92	64	1.18	0	66.2819	67.1377	140.767
10	1	2014	1	95.32	129.25	0.1	596.537	215.324	41.9947	12.8563
10	0	2014	1	96.88	146	2.26	1169.21	164.928	63.7003	57.542
10	0	2014	1	96.1	113.25	0.72	0	195.151	68.1395	3.02042
11	1	2014	1	99.74	74.5	1.18	0	138.592	125.798	87.4611
11	0	2014	1	97.66	47.25	1.16	292.303	50.7471	81.5975	140.569
11	0	2014	1	99.74	16.5	3.3	483.146	147.912	182.679	45.4667
12	1	2014	1	97.92	1	2.9	721.736	0	234.417	76.7513
12	0	2014	1	97.92	2.25	0.9	360.868	390.588	97.1231	53.2151
12	0	2014	1	96.1	5	1.7	0	446.873	73.661	45.0938
13	1	2014	1	92.72	94.75	2.18	2880.42	83.3366	104.566	182.04
13	0	2014	1	91.42	46	3.1	838.11	436.276	76.8118	230.884
13	0	2014	1	89.08	20.5	2.6	405.977	46.7685	113.566	160.197
14	1	2014	1	96.1	26.25	2.4	4059.77	0	133.846	241.787
14	0	2014	1	95.84	34.75	1.5	360.868	220.328	91.6598	282.42
14	0	2014	1	95.32	26.5	2.8	811.953	241.053	17.5595	210.062
15	1	2014	1	95.84	39	1.9	1169.21	101.143	47.84	176.166
15	0	2014	1	96.62	30.25	1.6	811.953	0	101.219	139.124
15	0	2014	1	94.8	38.5	0	202.988	239.143	33.0318	199.863
16	1	2014	1	98.7	2	0.8	1826.9	101.143	64.1211	305.502
16	0	2014	1	99.48	4	0.9	360.868	101.143	78.1695	259.099
16	0	2014	1	95.32	6	1.2	817.592	227.353	54.4835	348.534
17	1	2014	1	97.4	32.25	2.1	0	207.246	94.0483	203.275
17	0	2014	1	95.32	39.5	2.4	0	310.996	90.229	151.138
17	0	2014	1	95.32	26.75	1.6	0	121.067	103.566	168.648
18	1	2014	1	99.22	5.25	0	749.027	43.2401	70.1255	170.418
18	0	2014	1	98.44	7	0.9	596.537	140.586	81.3031	141.087
18	0	2014	1	96.62	4.75	0.4	202.988	60.3932	103.751	214.394
19	1	2014	1	99.22	1.25	1.4	241.573	263.178	79.0557	421.504
19	0	2014	1	97.14	0.5	0	456.724	110.512	80.3923	434.282
19	0	2014	1	97.66	6.5	0.8	2644.49	0	36.6166	368.206
20	1	2014	1	91.16	26.25	3.56	811.953	296.783	56.4641	158.688
20	0	2014	1	94.54	56.5	2.06	653.171	80.9704	75.8171	121.106
20	0	2014	1	91.94	21.5	2.14	241.573	446.289	119.364	196.999
21	1	2014	1	90.9	90.75	1.64	241.573	243.122	118.164	25.2903
21	0	2014	1	90.9	91.5	1.64	241.573	243.122	118.164	19.826
21	0	2014	1	92.72	16	2.04	6275.72	172.961	28.5452	99.0063
22	1	2014	1	97.14	9	3.6	202.988	114.181	53.9463	217.546
22	0	2014	1	92.98	39.5	2.8	456.724	0	145.478	196.601
22	0	2014	1	97.66	12.5	1.8	888.841	0	121.968	217.065
23	1	2014	1	99.74	26.25	1.6	2119.2	0	42.0944	273.078
23	0	2014	1	99.22	28	1	0	0	124.259	234.679
23	0	2014	1	99.48	7	1	584.607	0	188.829	285.69
24	1	2014	1	95.84	2	1.2	241.573	144.284	93.9866	331.747
24	0	2014	1	97.66	2.75	1.6	241.573	101.143	78.6113	280.78
24	0	2014	1	98.7	4	1	2119.2	0	51.5702	342.872
25	1	2014	1	98.18	9	1.4	292.303	0	128.363	360.282
25	0	2014	1	98.7	2.75	1.4	1981.17	40.0965	138.578	408.573
25	0	2014	1	97.66	0.25	2	241.573	46.7685	35.8382	310.649
26	1	2014	1	98.44	15	0.2	3653.79	302.873	88.5765	276.512
26	0	2014	1	97.66	16.75	0.2	1053.26	55.2558	48.269	251.889
26	0	2014	1	97.92	5	0.8	241.573	294.027	14.6311	277.407
27	1	2014	1	100	2.5	1.2	1130.41	0	84.7107	210.512
27	0	2014	1	97.66	10	0.8	0	230.105	77.5006	180.228
27	0	2014	1	99.48	6.5	0	596.537	80.1929	228.932	175.173
28	1	2014	1	97.14	4.5	1.1	241.573	40.0965	215.385	253.267
28	0	2014	1	97.4	16.25	0.6	856.16	326.216	142.65	209.116
28	0	2014	1	96.62	6.25	0.7	202.988	304.991	243.915	274.803
29	1	2014	1	94.02	12	3	483.146	469.744	62.9528	310.721
29	0	2014	1	96.62	39.5	2.4	1984.78	0	87.5619	316.431
29	0	2014	1	94.8	10.25	2.2	1014.94	345.237	31.5685	267.23
30	1	2014	1	92.72	78	3.02	0	90.0086	122.667	191.996
30	0	2014	1	91.94	65.75	1.64	0	276.873	165.116	220.029
30	0	2014	1	90.9	109	4.58	0	73.0758	85.5068	153.431
31	1	2014	1	98.96	33.5	1.3	241.573	0	149.476	239.014
31	0	2014	1	91.94	43.25	2.2	0	308.427	135.666	273.503
31	0	2014	1	88.3	29.75	2.8	596.537	55.2558	156.027	242.345
32	1	2014	1	96.1	87.25	0	0	223.45	49.9348	10.4335
32	0	2014	1	98.96	32.5	0	653.171	589.704	61.2489	14.8382
32	0	2014	1	98.44	95.25	0.4	292.303	129.913	69.7095	7.1931
33	1	2014	1	95.06	81.75	1.9	0	43.2401	192.41	161.391
33	0	2014	1	95.58	34	1.4	0	90.0086	195.61	217.429
33	0	2014	1	96.88	31.25	2.2	241.573	46.7685	175.044	120.56
34	1	2014	1	95.06	9.75	1.8	1345.83	0	195.153	74.1685
34	0	2014	1	94.8	25	1.4	0	214.439	142.463	28.8006
34	0	2014	1	96.88	26	0.7	0	460.076	138.98	77.5444
35	1	2014	1	89.08	118.5	1.54	0	119.844	58.7542	55.0735
35	0	2014	1	89.08	66.5	1.78	1434.65	223.708	32.0318	65.0911
35	0	2014	1	92.2	115.5	2.24	4264.79	0	10.81	21.118
36	1	2014	1	92.98	25.25	0.38	838.11	144.383	63.4902	52.0635
36	0	2014	1	92.98	27.5	0.74	826.179	409.277	49.824	6.33616
36	0	2014	1	91.42	65.25	2.26	0	446.603	71.2762	34.8146
37	1	2014	1	93.24	7	1.24	0	204.39	51.6332	12.832
37	0	2014	1	89.86	45.25	3.58	0	93.9872	29.9055	99.9498
37	0	2014	1	90.64	92.75	3.62	0	175.1	102.604	123.03
38	1	2014	1	70.36	93	1.5	952.015	149.134	84.0105	29.6036
38	0	2014	1	89.6	98	2.94	241.573	566.908	103.535	49.9979
38	0	2014	1	92.98	116	1.56	0	40.0965	206.8	83.0391
39	1	2014	1	99.48	32	1.62	0	86.865	41.8146	9.85778
39	0	2014	1	98.7	133.25	1.62	0	244.094	95.0294	16.0797
39	0	2014	1	98.44	105.5	1.54	360.868	101.143	37.608	23.372
40	1	2014	1	94.54	38	3.36	0	140.964	142.213	197.892
40	0	2014	1	89.6	48.5	2.96	0	55.2558	215.586	199.242
40	0	2014	1	84.92	63.5	3.56	0	46.7685	124.924	256.462
41	1	2014	1	91.94	36	2.86	241.573	46.7685	105.063	159.014
41	0	2014	1	90.38	60.5	2.56	0	213.057	152.772	149.362
41	0	2014	1	92.72	87.5	1.6	811.953	46.7685	155.413	212.446
42	1	2014	1	97.66	104.75	1.16	0	66.2819	58.5172	102.907
42	0	2014	1	92.46	54.75	2.46	202.988	250.277	59.0424	142.869
42	0	2014	1	95.58	117.25	3.2	0	255.007	189.47	133.005
43	1	2014	1	97.92	27.25	3.4	0	129.913	168.913	81.3298
43	0	2014	1	97.92	5.25	3.8	202.988	123.823	130.189	104.564
43	0	2014	1	96.1	10.75	3	241.573	114.181	125.686	118.637
44	1	2014	1	99.74	4	1.65	3653.79	204.398	81.7022	114.539
44	0	2014	1	98.44	16.75	1.9	811.953	172.961	103.589	112.614
44	0	2014	1	96.1	11.5	0.44	456.724	0	65.9727	134.151
45	1	2014	1	93.24	28.25	1.3	0	192.374	243.957	50.9441
45	0	2014	1	96.62	40	1.4	360.868	157.421	73.7582	85.4506
45	0	2014	1	85.18	31	1	0	0	43.8697	87.5517
46	1	2014	1	96.62	32	0.48	596.537	60.3932	152.507	50.6896
46	0	2014	1	95.58	128.25	3.22	1986.81	0	51.0102	84.6515
46	0	2014	1	95.84	34.5	2.26	292.303	164.928	70.5307	67.8365
47	1	2014	1	99.48	14.5	2.16	596.537	0	148.379	69.4991
47	0	2014	1	98.44	33.75	2.2	241.573	199.751	101.189	40.8321
47	0	2014	1	96.36	53.25	0.86	456.724	149.134	81.2951	80.5254
48	1	2014	1	98.7	6.25	1.26	2817.5	0	182.318	209.301
48	0	2014	1	96.88	42.75	3.12	0	46.7685	79.4989	169.059
48	0	2014	1	93.5	15	1.18	2109.08	73.0758	87.6814	244.805
49	1	2014	1	97.92	4	1.05	0	187.733	78.4843	73.4168
49	0	2014	1	87.26	11.5	1.8	1826.9	139.358	84.8849	74.7906
49	0	2014	1	97.4	4.5	4.8	0	264.436	96.4612	45.7237
50	1	2014	1	95.84	14	1.82	0	0	92.7687	250.593
50	0	2014	1	98.96	21.25	2.98	0	161.536	149.008	287.903
50	0	2014	1	95.32	57	2.78	1193.07	40.0965	137.964	266.61
51	1	2014	1	97.4	96.75	1.2	456.724	60.3932	52.8352	121.487
51	0	2014	1	96.36	129.75	3.4	653.171	0	65.0569	140.882
51	0	2014	1	96.62	138.25	3.1	0	182.113	92.6503	75.6021
52	1	2014	1	97.66	65.75	4.98	0	0	89.9955	190.853
52	0	2014	1	97.92	70.5	2.22	241.573	263.315	47.3384	159.588
52	0	2014	1	96.1	104	5.64	0	80.9704	75.627	153.767
53	1	2014	1	98.7	30.25	2	811.953	103.633	87.5852	216.812
53	0	2014	1	98.7	43.75	2	811.953	40.0965	106.511	202.538
53	0	2014	1	98.44	29.25	2.2	533.876	0	87.0535	233.253
54	1	2014	1	96.62	7.25	3.2	749.027	163.293	84.1933	288.585
54	0	2014	1	97.66	1.75	2.4	1560.98	0	79.0217	253.928
54	0	2014	1	93.76	2.25	1.2	811.953	296.294	89.6873	289.7
55	1	2014	1	97.92	54.5	0.5	292.303	292.805	51.7716	97.8107
55	0	2014	1	98.44	19.75	1.4	811.953	133.457	160.833	50.1063
55	0	2014	1	97.66	36	0.7	292.303	434.445	120.336	139.154
56	1	2014	1	99.74	22.75	1.1	202.988	140.964	94.5427	87.4611
56	0	2014	1	99.48	19.75	1.58	360.868	0	132.377	34.4996
56	0	2014	1	98.7	26	4.66	0	0	118.294	43.973
57	1	2014	1	97.92	2.25	1.5	292.303	149.134	45.4054	457.461
57	0	2014	1	97.4	6.25	2.6	596.537	569.811	99.6806	145.016
57	0	2014	1	99.22	4.25	0.6	894.744	173.153	111.32	485.262
58	1	2014	1	99.74	27.5	2.2	602.441	46.7685	206.158	92.411
58	0	2014	1	97.4	21.25	2	811.953	126.961	247.825	105.053
58	0	2014	1	98.7	37.5	3.4	0	123.823	92.6447	59.7993
59	1	2014	1	97.14	95.75	1.1	360.868	136.226	91.1133	2.45382
59	0	2014	1	99.22	32	0	533.876	262.026	87.6975	31.5146
59	0	2014	1	98.96	19.25	3.3	0	90.0086	127.972	17.0017
60	1	2014	1	95.32	13.75	5.8	0	191.36	80.9257	133.849
60	0	2014	1	96.62	26.25	0.38	202.988	166.613	115.849	173.712
60	0	2014	1	97.66	6.25	0.1	1097.73	395.741	94.7232	117.677
61	1	2014	1	97.92	6.5	1	0	287.141	142.593	24.2323
61	0	2014	1	96.62	13	1.5	0	350.042	150.643	52.8403
61	0	2014	1	97.4	57.25	1.7	913.448	73.0758	80.7995	83.6311
62	1	2014	1	95.32	32	3.4	888.841	0	102.788	155.837
62	0	2014	1	98.7	37.5	1.6	1014.04	230.201	67.6976	120.005
62	0	2014	1	98.18	28.75	2	292.303	508.529	73.0699	189.814
63	1	2014	1	98.18	86.25	3.2	1169.21	129.913	159.683	241.03
63	0	2014	1	99.74	55.75	2.6	241.573	109.522	152.538	186.203
63	0	2014	1	99.48	41.75	3	3199.1	80.9704	142.444	290.574
64	1	2014	1	93.76	0	4.2	0	114.181	101.116	312.556
64	0	2014	1	92.2	39	3	4110.51	40.0965	116.106	260.059
64	0	2014	1	94.8	67.25	1	0	384.591	34.7566	265.779
65	1	2014	1	96.88	5.5	0	0	0	63.3556	128.692
65	0	2014	1	98.96	8	0.6	811.953	270.668	91.5274	81.2471
65	0	2014	1	98.44	2	1.4	0	43.2401	134.31	103.85
66	1	2014	1	97.4	18.25	0	0	216.201	85.8959	168.303
66	0	2014	1	96.88	12	0.4	202.988	274.103	129.604	152.606
66	0	2014	1	91.16	17.5	0.6	0	106.003	104.534	138.257
67	1	2014	1	97.4	23	2.6	749.027	0	48.884	75.9744
67	0	2014	1	92.98	14.75	1.4	596.537	0	59.0388	122.84
67	0	2014	1	93.5	15.25	2.6	1765.75	114.181	55.0811	32.0994
68	1	2014	1	98.96	34.75	1.4	0	191.36	36.8656	211.468
68	0	2014	1	96.36	6.25	1.4	0	215.416	106.348	156.875
68	0	2014	1	95.58	7	1.2	1613.77	66.2819	46.4114	162.995
69	1	2014	1	96.62	0.25	0.6	596.537	101.143	96.3037	222.898
69	0	2014	1	96.36	12.25	1.4	202.988	0	78.0689	189.011
69	0	2014	1	98.96	1	1	811.953	172.961	104.721	271.556
70	1	2014	1	97.4	10.5	2.2	495.292	0	63.5168	84.8221
70	0	2014	1	96.62	11.25	0.2	894.744	170.591	56.3396	112.517
70	0	2014	1	94.8	17	0.4	0	654.699	117.139	131.169
71	1	2014	1	96.88	0	1.6	202.988	0	149.592	229.962
71	0	2014	1	98.96	1.5	1.2	360.868	73.0758	69.3279	262.969
71	0	2014	1	100	0.75	1.4	292.303	43.2401	112.608	249.649
72	1	2014	1	95.58	26.25	0.4	811.953	372.837	26.8414	1.79248
72	0	2014	1	97.66	11.5	0.2	292.303	73.0758	33.6526	24.49
72	0	2014	1	95.58	21.75	0	360.868	256.296	28.5452	7.13201
73	1	2014	1	96.36	27.5	0.46	596.537	172.961	73.0758	65.1896
73	0	2014	1	25.9	102.5	0	0	0	9.66292	28.4876
73	0	2014	1	79.2	45.75	0	202.988	1192.7	64.9563	30.3841
74	1	2014	1	95.32	57.5	0	817.592	0	17.3887	239.406
74	0	2014	1	99.74	15.75	0.8	202.988	83.3366	55.0537	228.004
74	0	2014	1	96.62	4.25	1.8	241.573	149.134	49.2104	214.114
75	1	2014	1	96.62	4.75	1.2	241.573	374.006	62.7145	266.465
75	0	2014	1	97.66	0.75	0.6	202.988	129.913	122.836	324.977
75	0	2014	1	99.48	0	1.4	0	0	63.142	305.888
76	1	2014	1	91.68	22	1.1	0	172.961	46.9129	144.885
76	0	2014	1	97.4	7.75	0.4	1763.97	246.036	102.924	168.984
76	0	2014	1	98.18	12	0.2	292.303	522.602	106.345	156.612
77	1	2014	1	95.58	63.75	2.6	596.537	196.194	64.7635	450.603
77	0	2014	1	94.28	10.75	2.4	0	0	103.124	435.981
77	0	2014	1	95.58	23.25	2	0	238.755	32.0829	474.922
78	1	2014	1	95.84	4.75	0.6	596.537	80.9704	76.8745	278.104
78	0	2014	1	97.92	1.75	1.4	811.953	55.2558	149.821	323.176
78	0	2014	1	98.7	4.75	1.2	456.724	0	61.7928	314.205
79	1	2014	1	91.68	16	1.6	202.988	257.642	51.9953	256.903
79	0	2014	1	81.54	46.75	0.9	1130.41	588.024	122.191	334.499
79	0	2014	1	95.06	40.75	1.4	698.297	263.315	113.006	107.163
80	1	2014	1	92.72	2.75	0.2	202.988	609.236	0	6.74368
80	0	2014	1	83.62	47.75	3	0	263.804	34.7566	18.6351
80	0	2014	1	62.82	42.25	1.8	1172.82	412.312	4.56724	5.01621
81	1	2014	1	94.54	32.5	0	0	405.63	38.5116	5.15666
81	0	2014	1	96.62	89.5	2.6	0	302.873	73.2759	0.012354
81	0	2014	1	98.7	154.5	3.4	202.988	0	202.78	15.4953
82	1	2014	1	95.06	39.5	1.2	2029.88	247.63	28.5452	23.3825
82	0	2014	1	95.84	24.25	1	0	274.103	84.2706	71.3182
82	0	2014	1	92.98	21	1.2	241.573	187.349	58.6352	69.8788
83	1	2014	1	96.1	7.5	1.5	596.537	50.7471	85.2599	74.7356
83	0	2014	1	96.1	5.5	0.8	1408.49	0	212.759	80.2837
83	0	2014	1	97.4	6.25	1.84	2106.79	0	133.861	31.1841
84	1	2014	1	87.52	55.75	1.42	653.171	0	65.2867	10.7724
84	0	2014	1	93.24	129	0.74	0	50.7471	108.334	60.4218
84	0	2014	1	89.6	69	0.68	0	0	88.5884	25.7015
85	1	2014	1	98.44	39	2.58	2541.41	0	286.371	176.671
85	0	2014	1	95.84	75.5	2.14	0	0	94.4081	229.663
85	0	2014	1	97.66	59.5	1.8	202.988	129.913	149.118	230.391
86	1	2014	1	96.88	3.5	0	202.988	156.399	112.107	367.613
86	0	2014	1	98.44	11.5	0.7	1530.08	55.2558	166.066	340.26
86	0	2014	1	91.16	11	0.7	0	0	67.359	342.465
87	1	2014	1	96.88	9.5	0.6	292.303	66.2819	29.242	9.57658
87	0	2014	1	96.62	77	0	0	526.631	129.804	25.7496
87	0	2014	1	61	35.5	0	0	46.7685	84.7476	7.66257
88	1	2014	1	97.92	0.25	2.4	1169.21	0	52.0789	303.894
88	0	2014	1	99.48	7.75	1	1116.44	0	60.7475	312.456
88	0	2014	1	99.48	11	1	292.303	40.0965	166.748	312.456
89	1	2014	1	99.22	10.75	0.6	456.724	0	58.9141	205.978
89	0	2014	1	77.9	76.25	0	292.303	0	35.5536	224.409
89	0	2014	1	96.88	0	0	0	160.949	40.3952	173.326
90	1	2014	1	91.42	43.25	3.3	0	239.472	84.9731	160.925
90	0	2014	1	89.6	10.25	0.92	0	286.311	24.0424	240.58
90	0	2014	1	90.12	13.5	1.34	456.724	399.404	10.406	263.872
91	1	2014	1	97.4	44.75	1.14	924.725	223.686	125.806	77.1625
91	0	2014	1	99.48	179.25	0.34	0	304.131	69.0368	57.1217
91	0	2014	1	98.96	45.75	1.82	799.526	113.05	134.782	57.8806
92	1	2014	1	98.96	112.25	1.52	653.171	66.2819	39.7956	67.5137
92	0	2014	1	92.46	122.75	1.02	0	0	88.3089	22.4291
92	0	2014	1	97.66	53	0.92	596.537	149.134	142.127	28.2323
93	1	2014	1	93.24	77.25	1.58	241.573	185.168	52.0647	131.409
93	0	2014	1	95.32	39.25	0.9	811.953	90.8436	28.6397	84.3261
93	0	2014	1	93.76	56.5	1.2	0	489.52	71.3055	103.083
94	1	2014	1	94.28	79	0	0	180.463	13.7017	28.4739
94	0	2014	1	64.9	185.5	0	0	0	15.8087	10.6467
94	0	2014	1	93.76	107.25	0	292.303	172.961	38.504	5.58416
95	1	2015	1	90.9	42.5	0.5	241.573	264.436	138.294	191.087
95	0	2015	1	94.02	22.25	0.4	2654.59	176.681	72.3195	155.509
95	0	2015	1	95.06	21	0.7	3143.86	40.0965	202.529	245.094
96	1	2015	1	92.98	39.5	2.2	202.988	174.574	132.237	14.7516
96	0	2015	1	91.68	180.25	1.3	596.537	0	57.5262	6.81454
96	0	2015	1	96.1	85.5	1.9	444.561	60.3932	92.0904	17.1441
97	1	2015	1	97.92	11.25	1.8	2080.63	0	293.151	24.55
97	0	2015	1	97.4	50	3	495.292	176.681	212.537	28.7342
97	0	2015	1	95.32	6	2.6	563.857	55.2558	75.7368	1.30242
98	1	2015	1	91.42	2.75	1.56	1471.67	407.378	39.2856	124.344
98	0	2015	1	93.76	12	2.4	1169.21	172.961	79.668	95.838
98	0	2015	1	94.8	48.5	2.12	1613.77	80.9704	62.715	160.796
99	1	2015	1	97.66	39.25	2.6	0	173.153	91.941	125.842
99	0	2015	1	96.62	0.5	3	0	721.541	8.11953	119.1
99	0	2015	1	99.48	3	2.4	721.736	164.928	70.6038	98.7674
100	1	2015	1	88.82	20.5	1.1	241.573	604.382	75.2801	250.247
100	0	2015	1	91.94	17.25	0.95	360.868	380.382	247.324	230.295
100	0	2015	1	91.42	48	1	0	219.563	199.367	213.348
101	1	2015	1	95.84	12.25	4.84	3156.02	154.046	63.4931	88.556
101	0	2015	1	95.06	26.25	3.94	360.868	196.194	78.8635	134.162
101	0	2015	1	90.12	26.5	3.92	0	197.999	64.9544	80.0236
102	1	2015	1	97.4	33	0.2	0	0	41.1648	195.245
102	0	2015	1	97.14	107.75	2.5	456.724	234.025	59.4542	240.764
102	0	2015	1	96.62	151.75	2.2	0	0	77.2421	236.181
103	1	2015	1	94.28	44	1.9	292.303	90.0086	48.4169	85.6312
103	0	2015	1	89.86	75	1.3	2040.01	0	144.947	40.4853
103	0	2015	1	91.68	113	2.4	1375.81	149.134	58.5501	83.7209
104	1	2015	1	97.4	98.25	1.8	0	83.3366	219.315	214.307
104	0	2015	1	96.1	98	2.6	0	259.445	149.909	185.011
104	0	2015	1	95.84	104.75	1.5	0	121.538	77.7279	232.948
105	1	2015	1	99.74	106.25	2.1	811.953	428.15	37.5846	81.4485
105	0	2015	1	97.14	105	2.6	0	0	157.838	94.5112
105	0	2015	1	88.56	136.75	2.9	0	172.961	52.733	41.2189
106	1	2015	1	89.6	46.75	0.54	360.868	702.259	112.782	23.179
106	0	2015	1	89.6	42	0.68	1822.38	86.4803	189.276	42.3494
106	0	2015	1	89.86	24.75	0.44	602.441	428.505	96.7715	45.9902
107	1	2015	1	98.44	19.25	2.2	241.573	66.2819	105.96	118.336
107	0	2015	1	95.32	24	3.3	360.868	0	141.131	62.1748
107	0	2015	1	95.84	11.5	3	1169.21	146.099	173.849	86.8324
108	1	2015	1	94.8	74.75	4.46	596.537	140.964	68.2469	95.8308
108	0	2015	1	94.28	23.25	2.24	0	60.3932	112.615	115.816
108	0	2015	1	92.98	21.75	6.44	0	0	63.8304	136.937
109	1	2015	1	96.62	57.5	1.8	292.303	0	122.366	91.3002
109	0	2015	1	96.1	58.75	2	0	0	143.286	120.886
109	0	2015	1	92.98	31.25	3.6	0	149.134	157.345	63.7866
110	1	2015	1	94.02	141.25	2	2119.2	172.961	130.902	105.231
110	0	2015	1	91.42	81.75	2.8	2875.91	90.2171	159.037	129.973
110	0	2015	1	94.8	152.25	2.7	811.953	172.961	201.41	67.6668
111	1	2015	1	96.62	4	0	202.988	0	136.333	310.147
111	0	2015	1	95.06	6.5	1.7	0	484.303	89.9669	351.93
111	0	2015	1	93.76	1	1.4	241.573	0	116.513	273.461
112	1	2015	1	95.06	97.25	2.8	0	203.389	45.1649	77.7654
112	0	2015	1	97.4	137.5	3.7	1422.72	40.0965	70.2772	98.6652
112	0	2015	1	97.4	152.5	2.4	0	80.9704	112.32	35.8336
113	1	2015	1	94.8	44.25	0.8	0	80.9704	154.374	60.5959
113	0	2015	1	94.8	49.75	2.9	1172.82	195.903	181.194	30.2835
113	0	2015	1	94.54	16.75	2.8	817.561	128.332	154.892	9.49539
114	1	2015	1	89.34	68.5	2	241.573	586.639	47.4665	17.2114
114	0	2015	1	89.08	57.5	0.85	241.573	335.168	82.5039	17.82
114	0	2015	1	85.96	53.75	1.2	811.953	652.281	183.95	52.2044
115	1	2015	1	90.9	34.75	1.2	838.11	395.033	102.206	142.695
115	0	2015	1	79.72	96.75	1.3	292.303	0	35.3929	164.106
115	0	2015	1	79.46	80	2.96	0	43.2401	51.3007	161.031
116	1	2015	1	95.84	19.75	1.6	202.988	166.613	136.922	83.8288
116	0	2015	1	94.28	22.75	1.4	241.573	244.094	170.845	65.1167
116	0	2015	1	97.92	20.75	1.5	241.573	192.033	218.981	91.2563
117	1	2015	1	98.7	20	1.3	292.303	436.276	77.7337	54.8018
117	0	2015	1	99.22	13.5	1.2	292.303	611.695	75.412	4.01001
117	0	2015	1	87	72.75	1.55	0	209.528	139.578	58.1922
118	1	2015	1	90.38	141	0.8	811.953	66.2819	0	139.874
118	0	2015	1	83.1	32	0.9	1408.49	646.182	116.749	125.717
118	0	2015	1	82.06	47	0.4	444.561	404.272	80.5612	125.717
119	1	2015	1	99.22	63.25	1.3	241.573	454.566	0	128.206
119	0	2015	1	97.14	81.25	2.1	0	194.68	70.8485	178.614
119	0	2015	1	98.7	90	2.6	0	472.975	36.5483	105.055
120	1	2015	1	99.74	90.5	0	596.537	257.642	170.632	76.608
120	0	2015	1	99.48	49.75	1	0	113.172	107.805	103.862
120	0	2015	1	96.1	59	1.1	405.977	495.515	27.6279	32.4125
121	1	2015	1	95.84	92.75	0.4	1826.9	167.425	31.2261	40.7595
121	0	2015	1	97.4	102	1	0	202.988	101.073	36.6236
121	0	2015	1	97.14	68.75	1	0	433.496	67.7002	89.58
122	1	2015	1	94.28	62.5	1.8	0	123.823	25.0034	80.4689
122	0	2015	1	91.16	78.75	2.3	0	90.2171	105.699	42.2867
122	0	2015	1	90.9	108.5	2.3	202.988	126.675	87.5044	103.972
123	1	2015	1	96.88	68.5	3.2	456.724	66.2819	147.749	385.468
123	0	2015	1	98.7	86.75	2.3	0	66.2819	232.744	392.199
123	0	2015	1	98.96	157.5	2.4	0	201.407	90.6201	348.6
124	1	2015	1	98.18	52.75	1.2	1059.16	43.2401	32.1694	179.661
124	0	2015	1	89.6	71.75	1.5	1771.65	46.7685	254.511	137.973
124	0	2015	1	86.74	56.75	1.4	1414.13	0	163.497	163.655
125	1	2015	1	99.48	6.25	0.2	456.724	345.237	81.4858	315.944
125	0	2015	1	96.36	84.25	0.5	2187.76	127.739	92.2582	289.57
125	0	2015	1	92.72	86	0.5	456.724	345.237	81.4858	303.874
126	1	2015	1	91.94	45.75	3.5	563.857	40.0965	49.9793	68.9003
126	0	2015	1	96.62	96.75	3.6	0	40.0965	171.5	14.1925
126	0	2015	1	96.1	47.75	3.9	653.171	326.107	113.676	25.0658
127	1	2015	1	98.44	68.25	1.3	0	0	167.492	184.951
127	0	2015	1	99.48	186	2.8	0	189.231	115.047	136.179
127	0	2015	1	97.92	31	3.3	0	55.2558	52.8143	131.09
128	1	2015	1	86.74	129	1.8	1169.21	0	186.118	142.245
128	0	2015	1	94.28	98.25	2.4	1981.17	279.047	151.788	145.811
128	0	2015	1	93.5	98.5	1.7	241.573	60.3932	350.967	95.6235
129	1	2015	1	90.12	114	0.8	1826.9	336.758	173.206	78.4787
129	0	2015	1	97.92	67.5	2.4	0	0	218.367	125.403
129	0	2015	1	96.62	81.75	2.1	1617.12	1800.53	0	45.5294
130	1	2015	1	98.44	73.75	0	1169.21	278.488	74.455	23.9276
130	0	2015	1	92.2	89.75	0.7	1169.21	189.231	146.249	63.3013
130	0	2015	1	92.2	100.25	0.5	888.841	253.931	99.6792	38.3865
131	1	2015	1	96.62	54.75	2.5	1826.9	220.13	121.128	111.674
131	0	2015	1	96.36	47.25	1.4	0	172.961	103.19	109.153
131	0	2015	1	98.18	24.25	1.9	5085.44	246.942	201.626	79.3113
132	1	2015	1	96.1	150.5	1.9	1172.82	107.162	78.1258	255.631
132	0	2015	1	98.7	96.5	2.1	0	114.181	140.51	268.617
132	0	2015	1	91.94	46.75	3	0	399.839	22.5359	231.234
133	1	2015	1	98.96	74.25	0.3	811.953	198.659	131.301	150.982
133	0	2015	1	88.04	90.5	1.7	1104.26	473.068	23.8615	193.427
133	0	2015	1	96.88	142.25	0.4	4091.55	494.079	46.2253	200.535
134	1	2015	1	98.18	12.5	2.1	0	0	152.047	105.235
134	0	2015	1	86.22	71.75	0.7	0	196.194	127.785	160.992
134	0	2015	1	96.36	17	0.5	2342.03	279.531	42.7056	149.539
135	1	2015	1	93.24	17.5	1.5	838.11	90.2171	174.995	110.766
135	0	2015	1	89.34	26.25	2.5	241.573	0	183.317	55.5613
135	0	2015	1	90.12	17.5	1.34	957.405	46.7685	148.589	154.641
136	1	2015	1	98.96	10.75	1.3	456.724	0	94.0238	92.5923
136	0	2015	1	96.1	19	1.8	811.953	73.0758	214.488	129.014
136	0	2015	1	99.48	6.5	0.4	596.537	286.412	111.886	102.857
137	1	2015	1	96.1	54	0.7	292.303	339.573	65.8802	170.019
137	0	2015	1	95.84	33.25	0.8	241.573	369.665	47.9605	118.396
137	0	2015	1	94.28	27.25	1.5	698.297	137.612	97.2558	203.243
138	1	2015	1	81.28	28	2.2	838.11	0	175.989	43.1691
138	0	2015	1	88.3	39.25	2.38	0	315.906	123.406	15.4692
138	0	2015	1	87	38.75	2.8	0	310.676	122.881	101.267
139	1	2015	1	93.24	76.5	2	292.303	453.538	28.5452	23.0957
139	0	2015	1	96.36	55.25	2.9	0	184.204	37.2836	0.886412
139	0	2015	1	95.84	57.75	2	202.988	182.598	21.3516	14.4645
140	1	2015	1	98.44	78.25	0.4	0	329.597	54.204	11.3408
140	0	2015	1	97.4	7	0.9	0	292.805	83.4976	4.4642
140	0	2015	1	68.8	0	0	622.705	158.147	106.255	7.03097
141	1	2015	1	96.62	66.5	2.9	1169.21	0	100.164	82.0132
141	0	2015	1	98.18	95	1.1	0	102.024	67.6903	179.298
141	0	2015	1	97.92	97.75	2.4	1826.9	126.961	58.1023	172.559
142	1	2015	1	97.4	15.5	0.7	360.868	137.227	135.89	160.282
142	0	2015	1	96.1	6.75	1.6	1372.2	0	219.371	115.257
142	0	2015	1	92.46	25.25	1.3	0	0	122.158	114.816
143	1	2015	1	98.44	6.75	0.8	1256.51	0	106.302	133.942
143	0	2015	1	98.18	42	1.4	360.868	287.141	107.264	175.779
143	0	2015	1	91.42	101.25	0.9	596.537	0	119.571	155.388
144	1	2015	1	98.18	5.75	0	0	376.141	45.2183	324.177
144	0	2015	1	98.44	13.25	0.6	698.297	73.0758	109.758	359.391
144	0	2015	1	98.96	11	0.7	0	172.961	130.11	363.899
145	1	2015	1	93.76	66.5	0.7	360.868	395.033	80.0804	0.573098
145	0	2015	1	97.92	14	0.3	596.537	425.728	36.989	45.3588
145	0	2015	1	98.18	11.25	1	659.712	347.535	105.441	25.3598
146	1	2015	1	94.28	30.25	2.4	1172.82	0	149.544	80.5719
146	0	2015	1	93.24	34.75	1.7	456.724	357.266	120.05	128.152
146	0	2015	1	97.4	34.5	1.2	533.876	325.815	154.83	129.155
147	1	2015	1	96.36	11	0.1	2996.11	176.681	61.3158	255.271
147	0	2015	1	97.92	10.25	1.3	0	50.7471	112.452	243.17
147	0	2015	1	99.48	8	1.8	596.537	0	83.551	230.975
148	1	2015	1	97.66	98.25	2.2	1169.21	0	259.248	64.2088
148	0	2015	1	91.68	39.25	0.9	241.573	0	148.815	46.79
148	0	2015	1	94.02	98.25	1.4	0	183.754	125.533	28.6041
149	1	2015	1	91.68	25	3.2	787.595	673.892	0	140.385
149	0	2015	1	71.92	0	0	0	101.143	80.6438	9.49495
149	0	2015	1	91.68	35	2.8	1307.25	317.344	83.6731	38.3172
150	1	2015	1	97.66	3.25	0.6	1169.21	259.825	74.0134	80.9611
150	0	2015	1	98.44	25.25	1.2	1625.94	114.181	116.38	79.186
150	0	2015	1	98.96	4	1.5	0	0	66.3091	105.572
151	1	2015	1	95.32	37.75	2.1	292.303	329.597	8.68916	350.956
151	0	2015	1	96.62	4.75	1.9	1109.9	172.961	64.125	350.956
151	0	2015	1	90.9	45.25	1.2	0	101.143	58.7538	306.414
152	1	2015	1	95.06	34.5	0.8	456.724	288.61	142.297	181.717
152	0	2015	1	83.88	36.75	0.74	596.537	149.134	147.265	155.65
152	0	2015	1	91.16	15.25	0.36	292.303	90.2171	138.282	132.499
153	1	2015	1	83.1	115.25	3.3	0	0	49.7612	152.655
153	0	2015	1	91.68	121.5	2.5	0	0	100.551	157.293
153	0	2015	1	87	59.5	1.7	0	0	88.0974	136.578
154	1	2015	1	89.08	15.5	0	0	46.7685	109.684	3.16022
154	0	2015	1	91.94	27.25	2.2	292.303	73.0758	78.227	0.716942
154	0	2015	1	93.5	15.75	0.7	0	121.067	150.366	0.545616
155	1	2015	1	95.58	15	1.3	1268.68	0	160.608	43.3696
155	0	2015	1	98.18	6.75	1.4	360.868	0	184.73	64.2539
155	0	2015	1	91.16	11.75	2.4	292.303	223.708	105.445	0.389174
156	1	2015	1	95.58	42.5	1.2	596.537	294.607	51.0975	375.726
156	0	2015	1	91.68	17.5	1	0	134.084	149.056	410.826
156	0	2015	1	90.38	30.75	2.5	241.573	223.708	70.6337	423.772
157	1	2015	1	88.82	12	3.1	456.724	288.4	91.6213	252.872
157	0	2015	1	86.74	35	2.5	1410.79	149.134	177.103	272.981
157	0	2015	1	92.72	32	1.2	1169.21	90.2171	102.63	269.892
158	1	2015	1	97.66	5	1.4	202.988	43.2401	86.5269	112.163
158	0	2015	1	98.7	18.5	0.6	2480.07	0	79.3364	87.5308
158	0	2015	1	98.44	9.25	1.2	0	256.297	99.4988	130.873
159	1	2015	1	98.7	75.25	0.2	596.537	171.814	108.564	148.428
159	0	2015	1	97.4	36.5	1.2	292.303	55.2558	240.395	92.2125
159	0	2015	1	97.66	19.25	0	811.953	323.477	172.271	184.847
160	1	2015	1	97.4	55.5	2.3	1804.34	172.961	107.467	89.9554
160	0	2015	1	96.1	104.5	1.9	241.573	83.3366	176.27	108.692
160	0	2015	1	95.58	18.5	1.1	584.607	149.134	196.424	81.1605
161	1	2015	1	93.5	45.25	2.1	1765.75	0	76.0015	231.314
161	0	2015	1	91.16	31.5	2.2	2644.49	0	131.085	207.13
161	0	2015	1	79.98	22	1.5	241.573	322.095	95.346	194.989
162	1	2015	1	90.9	40	0.5	2119.2	106.003	232.785	95.3422
162	0	2015	1	88.56	31.75	0.6	241.573	188.008	108.379	47.6981
162	0	2015	1	94.28	37.25	0.5	1510.25	0	135.903	121.12
163	1	2015	1	97.4	12.25	2.3	3237.68	40.0965	192.793	71.094
163	0	2015	1	96.36	61.5	1.3	2548.63	0	94.8943	75.3067
163	0	2015	1	98.7	128.75	0.9	456.724	60.3932	71.7177	184.218
164	1	2015	1	89.34	50.5	2.7	456.724	185.168	108.124	211.648
164	0	2015	1	96.1	30.25	1.9	1865.21	0	168.034	186.96
164	0	2015	1	94.02	40.25	2.5	811.953	471.288	11.6921	223.089
165	1	2015	1	93.24	75.75	0.4	0	309.187	41.0945	79.2915
165	0	2015	1	96.62	104.5	2	0	622.868	23.8615	29.8254
165	0	2015	1	91.16	65.5	2.6	0	397.24	103.066	58.3763
166	1	2015	1	94.02	44.75	1.4	653.171	0	217.999	118.359
166	0	2015	1	92.98	60.75	1.9	811.953	60.3932	209.641	175.004
166	0	2015	1	97.92	32.75	1.9	0	452.007	174.05	133.37
167	1	2015	1	89.08	159.5	0	0	80.9704	0	13.9264
167	0	2015	1	90.9	63.75	3.6	0	0	93.2293	7.74927
167	0	2015	1	87.78	119.25	2.7	0	80.9704	75.5533	50.9882
168	1	2015	1	90.64	76.75	2.94	0	40.0965	27.6671	112.868
168	0	2015	1	90.12	77	2.3	4110.51	0	100.805	61.0801
168	0	2015	1	88.82	78.25	2.3	811.953	90.2171	215.457	149.391
169	1	2015	1	95.84	25.5	2.8	0	0	127.794	99.4075
169	0	2015	1	95.58	77.25	3.2	2842.87	179.079	192.389	131.56
169	0	2015	1	91.94	67.5	1.5	2793.12	0	61.654	91.0443
170	1	2015	1	96.36	127.25	3.2	0	0	114.061	76.8343
170	0	2015	1	97.66	142.75	2.7	3808.06	86.865	99.8799	36.0743
170	0	2015	1	88.04	142.75	1.8	1345.56	129.913	121.896	52.3053

## Sheet: juvData
setid	bird	use	year	SPECIEScode	age	canopy	UnderFoliage	AveLL	saplingSH	polesSH	sawSH	distedge
25	194100481	1	2012	2	1	98.44	71.9	2.4	0	129.913	462.489	84.8353
25	194100481	0	2012	2	1	98.96	51	1.96	596.537	1039.3	174.083	71.9801
25	194100481	0	2012	2	1	96.88	51	1.94	596.537	259.825	200.065	47.8663
26	194100481	1	2012	2	2	97.66	71.9	2.64	1193.07	129.913	155.895	38.4276
26	194100481	0	2012	2	2	99.74	51	0.76	596.537	1299.13	120.819	41.4296
26	194100481	0	2012	2	2	98.96	51	0.9	0	1688.86	88.3405	28.2919
27	194100481	1	2012	2	3	97.4	71.9	2.925	596.537	389.738	279.312	58.3372
27	194100481	0	2012	2	3	98.18	51	0.76	596.537	129.913	135.109	104.033
27	194100481	0	2012	2	3	98.96	51	1.14	596.537	0	146.801	81.4732
28	194100481	1	2012	2	4	96.88	71.9	1.94	596.537	129.913	123.417	150.862
28	194100481	0	2012	2	4	97.4	51	1.8	0	519.65	200.065	120.925
28	194100481	0	2012	2	4	98.7	51	1.96	0	519.65	132.511	130.563
1	194100486	1	2012	2	0	98.7	71.9	1.8	0	779.475	111.725	28.4099
1	194100486	0	2012	2	0	56.32	51	1.2	0	129.913	88.3405	9.06218
1	194100486	0	2012	2	0	97.66	51	0.96	0	259.825	193.57	43.6114
2	194100486	1	2012	2	1	97.66	71.9	1.46	596.537	0	211.757	14.3439
2	194100486	0	2012	2	1	98.44	51	1.02	1193.07	0	93.537	41.8403
2	194100486	0	2012	2	1	95.84	51	1.16	0	0	181.878	53.1224
3	194100486	1	2012	2	2	94.8	71.9	0.5	0	519.65	206.561	1.21661
3	194100486	0	2012	2	2	0.68	51	0.7	0	0	0	11.1561
3	194100486	0	2012	2	2	99.22	51	2.1	596.537	129.913	193.57	32.7824
4	194100486	1	2012	2	3	98.44	71.9	0.5	596.537	2078.6	109.127	0.889538
4	194100486	0	2012	2	3	97.92	51	1.32	0	129.913	226.048	37.9577
4	194100486	0	2012	2	3	95.58	51	0.1	1789.61	1818.78	109.127	12.3495
5	194100486	1	2012	2	4	98.44	71.9	0.44	4175.76	389.738	0	5.2431
5	194100486	0	2012	2	4	97.4	51	1.16	1193.07	909.388	79.2467	14.6303
5	194100486	0	2012	2	4	99.22	51	3.34	0	649.563	164.989	3.84151
6	194100486	1	2012	2	5	46.96	71.9	0.04	596.537	519.65	0	22.1918
6	194100486	0	2012	2	5	94.54	51	0.06	596.537	259.825	44.1703	0.311265
6	194100486	0	2012	2	5	81.02	51	0.7	0	779.475	55.8624	2.81607
7	194100486	1	2012	2	6	79.2	71.9	0	0	389.738	348.166	2.16294
7	194100486	0	2012	2	6	90.64	51	1	0	389.738	76.6484	7.99372
7	194100486	0	2012	2	6	78.42	51	2.54	0	389.738	185.775	36.8801
8	194100486	1	2012	2	7	98.96	71.9	0.1	1789.61	129.913	23.3843	1.99026
8	194100486	0	2012	2	7	98.44	51	0.6	596.537	259.825	102.631	35.9182
8	194100486	0	2012	2	7	97.92	51	0.56	596.537	259.825	90.9388	3.42457
9	194100486	1	2012	2	7	96.36	71.9	0	0	259.825	155.895	8.75556
9	194100486	0	2012	2	7	19.14	51	0.26	0	0	67.5545	1.37495
9	194100486	0	2012	2	7	97.92	51	3.48	596.537	909.388	176.681	19.3919
12	194100486	1	2012	2	10	78.16	71.9	0.98	0	389.738	32.4781	21.1307
12	194100486	0	2012	2	10	95.58	51	3.7	596.537	389.738	97.4344	23.8409
12	194100486	0	2012	2	10	93.76	51	1.2	1193.07	389.738	262.423	18.4924
13	194100486	1	2012	2	11	57.62	71.9	0.7	0	519.65	0	20.0962
13	194100486	0	2012	2	11	22.52	51	0	0	0	0	4.75423
13	194100486	0	2012	2	11	97.4	51	0.32	596.537	909.388	220.851	25.9375
14	194100486	1	2012	2	12	93.5	71.9	0.4	596.537	259.825	0	5.25875
14	194100486	0	2012	2	12	97.14	51	0.96	1789.61	649.563	32.4781	0.192017
14	194100486	0	2012	2	12	24.08	51	0.56	0	519.65	97.4344	13.0624
15	194100486	1	2012	2	13	98.44	71.9	0.9	1193.07	129.913	67.5545	2.83863
15	194100486	0	2012	2	13	96.36	51	2.1	1193.07	259.825	323.482	42.1784
15	194100486	0	2012	2	13	10.04	51	0	0	0	64.9563	5.54012
16	194100486	1	2012	2	14	95.84	71.9	0.6	0	1039.3	55.8624	2.1923
16	194100486	0	2012	2	14	95.84	51	1.6	0	779.475	64.9563	43.4453
16	194100486	0	2012	2	14	95.84	51	1.16	1193.07	909.388	11.6921	50.2137
17	194100486	1	2012	2	15	97.14	71.9	0	596.537	649.563	11.6921	2.84747
17	194100486	0	2012	2	15	98.96	51	1.9	0	779.475	135.109	50.4064
17	194100486	0	2012	2	15	83.62	51	0	0	389.738	44.1703	0.237314
18	194100486	1	2012	2	16	98.44	71.9	0.6	0	1039.3	153.297	7.92225
18	194100486	0	2012	2	16	97.4	51	0.84	1193.07	909.388	55.8624	22.9959
18	194100486	0	2012	2	16	99.74	51	0.2	0	1169.21	153.297	13.9541
19	194100486	1	2012	2	17	95.06	71.9	0	1193.07	1688.86	324.781	0.673205
19	194100486	0	2012	2	17	45.4	51	0	0	389.738	97.4344	8.12343
19	194100486	0	2012	2	17	96.62	51	0.5	0	649.563	153.297	2.71688
20	194100486	1	2012	2	18	99.48	71.9	0.06	596.537	649.563	88.3405	7.80589
20	194100486	0	2012	2	18	12.38	51	0	0	0	32.4781	5.13776
20	194100486	0	2012	2	18	91.42	51	0.2	596.537	909.388	76.6484	0.200604
21	194100486	1	2012	2	19	75.3	71.9	0.1	0	909.388	162.391	4.72522
21	194100486	0	2012	2	19	97.92	51	1.52	0	779.475	102.631	3.43146
21	194100486	0	2012	2	19	61.52	51	0.4	0	519.65	32.4781	1.36926
22	194100486	1	2012	2	20	97.4	71.9	0.26	1193.07	389.738	76.6484	3.22299
22	194100486	0	2012	2	20	97.4	51	1.1	1193.07	389.738	132.511	38.4875
22	194100486	0	2012	2	20	97.14	51	0.2	1193.07	1818.78	97.4344	8.03984
24	194100486	1	2012	2	22	95.32	71.9	0.7	0	1429.04	128.613	2.87937
24	194100486	0	2012	2	22	91.16	51	0.2	0	129.913	11.6921	2.36499
24	194100486	0	2012	2	22	98.18	51	0.5	0	1169.21	120.819	1.0422
422	194100486	1	2012	2	23	2.5	71.9	1.2	0	1169.21	67.5545	32.7108
422	194100486	0	2012	2	23	2.24	51	0.88	596.537	259.825	90.9388	83.2915
422	194100486	0	2012	2	23	50.86	51	0.5	0	0	368.952	5.82121
141	194100494	1	2013	2	2	100	154.25	4.9	838.11	0	122.959	58.7463
141	194100494	0	2013	2	2	98.18	81.25	3.6	360.868	0	123.842	52.5609
141	194100494	0	2013	2	2	97.4	127	2.92	0	0	187.152	118.021
142	194100494	1	2013	2	3	96.62	86.5	3.1	292.303	145.473	83.2376	65.9293
142	194100494	0	2013	2	3	97.66	117.25	3.7	292.303	80.9704	177.022	23.1447
142	194100494	0	2013	2	3	98.44	86.75	4.88	1461.52	264.783	179.797	39.2255
143	194100494	1	2013	2	4	100	117	4.12	1268.68	0	104.74	85.9535
143	194100494	0	2013	2	4	100	146.5	4.24	0	0	204.79	36.7044
143	194100494	0	2013	2	4	95.84	102	6.72	0	0	148.263	99.2084
144	194100494	1	2013	2	5	98.44	145.5	1.54	0	0	104.051	57.6219
144	194100494	0	2013	2	5	99.48	141.75	5.26	202.988	55.2558	286.591	57.0911
144	194100494	0	2013	2	5	99.48	166	4.48	0	43.2401	227.488	108.925
145	194100494	1	2013	2	6	98.18	177.25	3.04	0	60.3932	207.564	54.81
145	194100494	0	2013	2	6	99.48	167.75	4.56	0	0	159.548	25.5066
145	194100494	0	2013	2	6	98.96	127	4.5	202.988	46.7685	140.505	106.662
146	194100494	1	2013	2	7	98.7	184.25	2.78	0	115.649	260.744	42.592
146	194100494	0	2013	2	7	99.48	172.75	4.9	0	50.7471	259.989	83.5628
146	194100494	0	2013	2	7	98.18	162.25	4.36	360.868	86.865	197.829	47.7431
147	194100494	1	2013	2	8	96.62	149.5	3	0	0	206.218	73.2292
147	194100494	0	2013	2	8	98.44	113.75	1.88	0	66.2819	153.666	34.7519
147	194100494	0	2013	2	8	94.02	147.25	3.5	0	0	233.995	26.5912
148	194100494	1	2013	2	9	98.96	129.5	3.42	596.537	0	257.936	68.3558
148	194100494	0	2013	2	9	94.28	112	5.74	0	66.2819	131.905	99.9306
148	194100494	0	2013	2	9	100	149.5	4.12	0	0	219.732	110.898
149	194100494	1	2013	2	10	97.4	85.5	2.7	0	0	155.385	37.2061
149	194100494	0	2013	2	10	98.96	168.25	3.32	4047.34	40.0965	142.616	78.7081
149	194100494	0	2013	2	10	94.28	179.25	5	0	347.134	116.701	23.3643
150	194100494	1	2013	2	11	97.4	131.5	2.8	1664.5	50.7471	124.431	34.4863
150	194100494	0	2013	2	11	96.36	148.5	4.22	0	0	163.967	37.4944
150	194100494	0	2013	2	11	99.74	124	5.14	241.573	342.97	146.61	14.7352
151	194100494	1	2013	2	12	99.74	187.5	5.44	0	106.378	108.845	16.0816
151	194100494	0	2013	2	12	94.28	186.25	5.14	2360.77	73.0758	173.248	12.5386
151	194100494	0	2013	2	12	0.16	30	0	652.358	195.213	113.668	27.3429
152	194100494	1	2013	2	13	96.36	191.5	3.24	292.303	66.2819	98.7671	5.55897
152	194100494	0	2013	2	13	0.16	25	0	652.358	195.213	113.668	13.8917
152	194100494	0	2013	2	13	99.74	123.25	5.96	241.573	0	128.199	29.6788
153	194100494	1	2013	2	14	100	167.25	4.26	811.953	0	121.069	19.3651
153	194100494	0	2013	2	14	97.92	165	3.34	0	215.324	81.0131	1.02608
153	194100494	0	2013	2	14	10.3	59.75	0	0	0	28.2487	2.66453
154	194100494	1	2013	2	15	89.34	177	2.3	360.868	0	41.2762	6.15256
154	194100494	0	2013	2	15	100	187.75	6	1826.9	283.959	133.211	30.6509
154	194100494	0	2013	2	15	36.82	73.25	0	0	0	34.7642	11.8072
155	194100494	1	2013	2	16	27.72	112.5	0	0	0	27.6279	4.95578
155	194100494	0	2013	2	16	0.16	24.25	0	652.358	195.213	113.668	37.0545
155	194100494	0	2013	2	16	2.24	27.25	0	652.358	195.213	113.668	23.8458
157	194100494	1	2013	2	18	100	162.25	6.02	0	0	308.376	49.4013
157	194100494	0	2013	2	18	100	162.25	4.32	0	0	356.421	96.2678
157	194100494	0	2013	2	18	97.92	124.5	5.18	3808.06	66.2819	148.404	94.0913
159	194100494	1	2013	2	20	95.32	168	5.42	360.868	40.0965	230.601	72.3399
159	194100494	0	2013	2	20	98.96	110.25	4.3	0	0	124.41	80.4208
159	194100494	0	2013	2	20	97.92	100.75	3.92	0	50.7471	205.026	108.358
161	194100494	1	2013	2	22	100	147.5	4.62	1769.36	40.0965	158.424	82.6877
161	194100494	0	2013	2	22	100	131.5	5.6	0	0	213.134	55.5756
161	194100494	0	2013	2	22	99.48	125.25	5.3	0	239.351	129.904	87.3018
163	194100494	1	2013	2	24	95.84	140.25	6.86	749.027	0	47.9097	18.0427
163	194100494	0	2013	2	24	21.22	115.75	1.64	0	187.257	0	4.79969
163	194100494	0	2013	2	24	100	172.25	3.1	202.988	149.134	139.22	12.1114
165	194100494	1	2013	2	26	97.66	153	5.3	1169.21	0	230.684	94.0193
165	194100494	0	2013	2	26	99.48	120.5	4.98	456.724	0	201.018	140.162
165	194100494	0	2013	2	26	100	177	7.42	1408.49	0	174.087	63.4058
166	194100494	1	2013	2	28	93.24	196.25	3.2	1771.65	0	134.172	15.9662
166	194100494	0	2013	2	28	98.96	122	4.96	1826.9	0	131.936	42.2234
166	194100494	0	2013	2	28	3.28	22.25	0	652.358	195.213	113.668	14.1953
167	194100494	1	2013	2	29	95.32	147.75	5.22	444.561	46.7685	136.685	88.6578
167	194100494	0	2013	2	29	98.96	192.5	4.96	0	40.0965	70.1046	61.6823
167	194100494	0	2013	2	29	100	126.5	3.92	0	0	130.443	43.17
169	194100494	1	2013	2	31	99.48	156.5	4.9	811.953	0	159.842	94.1936
169	194100494	0	2013	2	31	99.74	128.5	3.94	811.953	0	176.131	50.2985
169	194100494	0	2013	2	31	98.18	105.25	2.92	0	40.0965	102.053	112.264
170	194100494	1	2013	2	33	100	158	2.5	817.592	176.681	11.6921	14.5487
170	194100494	0	2013	2	33	79.2	186.75	1.92	1826.9	93.537	170.242	33.434
170	194100494	0	2013	2	33	95.32	149.75	3.74	202.988	209.302	128.414	3.36735
171	194100494	1	2013	2	35	100	33.25	4.42	292.303	113.05	186.585	6.53709
171	194100494	0	2013	2	35	100	94.25	3.82	202.988	259.441	152.177	52.2369
171	194100494	0	2013	2	35	100	122.25	5.48	0	347.179	133.345	39.3363
172	194100494	1	2013	2	37	87.26	174	2.14	0	46.7685	170.242	23.6394
172	194100494	0	2013	2	37	99.22	123.75	4.14	0	0	141.102	74.3118
172	194100494	0	2013	2	37	100	198	5.6	202.988	0	142.439	12.8237
173	194100494	1	2013	2	39	98.18	198	2.4	1625.94	114.181	24.8054	4.74495
173	194100494	0	2013	2	39	100	133.25	5.42	4168.93	55.2558	114.484	12.6003
173	194100494	0	2013	2	39	10.3	77.75	0	652.358	195.213	113.668	6.83116
70	194100495	1	2013	2	1	98.7	17.25	4.24	799.526	326.891	168.084	22.3306
70	194100495	0	2013	2	1	13.68	81.25	0	0	43.2401	21.013	6.03687
70	194100495	0	2013	2	1	53.2	105	2.82	652.358	195.213	113.668	3.29511
72	194100495	1	2013	2	3	46.96	67.25	0.36	202.988	107.162	33.9695	3.8044
72	194100495	0	2013	2	3	90.38	56	2.94	0	183.754	115.736	14.7889
72	194100495	0	2013	2	3	40.2	19.5	1.24	0	0	38.8685	3.34693
74	194100495	1	2013	2	5	100	76.75	1.42	0	176.681	55.6615	19.8223
74	194100495	0	2013	2	5	96.62	65.5	2.68	0	277.824	120.276	34.2403
74	194100495	0	2013	2	5	99.48	140.25	1.94	0	176.681	119.989	56.3345
76	194100495	1	2013	2	7	86.22	93	0	202.988	0	43.9556	1.40266
76	194100495	0	2013	2	7	100	105.75	2.54	0	483.994	135.587	37.1301
76	194100495	0	2013	2	7	23.3	92.25	0	0	0	126.604	39.5509
78	194100495	1	2013	2	9	97.14	130.25	3.24	360.868	43.2401	174.24	7.95363
78	194100495	0	2013	2	9	99.22	113.25	2.66	292.303	552.981	185.732	14.1045
78	194100495	0	2013	2	9	100	11.25	3.18	0	0	309.541	57.6245
82	194100495	1	2013	2	13	100	200	0	1826.9	402.906	0	26.8544
82	194100495	0	2013	2	13	99.48	65.5	4.2	202.988	170.979	99.4911	72.5246
82	194100495	0	2013	2	13	100	43.25	4.6	0	452.293	190.961	75.876
84	194100495	1	2013	2	15	97.66	118.5	3.92	811.953	702.686	50.3489	38.617
84	194100495	0	2013	2	15	98.7	168	1.96	2187.76	378.113	99.2032	23.0768
84	194100495	0	2013	2	15	95.84	144	3.68	0	344.34	88.804	37.4906
85	194100495	1	2013	2	17	100	197.5	3.92	1041.33	258.244	61.0899	14.608
85	194100495	0	2013	2	17	96.62	187.75	3.5	1832.53	73.0758	113.195	26.8415
85	194100495	0	2013	2	17	95.32	187.75	0.48	202.988	855.176	43.9832	51.1733
86	194100495	1	2013	2	18	98.7	43.5	4.24	1826.9	357.165	124.609	26.1316
86	194100495	0	2013	2	18	98.7	36.75	2.22	202.988	207.146	167.996	14.3123
86	194100495	0	2013	2	18	25.9	108.75	0	0	0	22.1983	2.46366
87	194100495	1	2013	2	20	98.44	38.75	2.38	0	207.146	126.056	21.6605
87	194100495	0	2013	2	20	100	27.75	2.88	0	386.988	146.673	61.6801
87	194100495	0	2013	2	20	100	85.5	3.12	838.11	228.216	186.697	65.1433
88	194100495	1	2013	2	22	89.34	184	0.5	0	439.636	20.2426	30.7506
88	194100495	0	2013	2	22	93.5	167	2.46	2187.76	172.961	115.202	43.726
88	194100495	0	2013	2	22	95.06	189.25	2.96	0	593.759	168.699	64.5634
89	194100495	1	2013	2	23	97.92	91.5	2.78	0	136.226	322.499	45.2026
89	194100495	0	2013	2	23	100	73.5	1.88	0	294.686	114.292	35.2239
89	194100495	0	2013	2	23	99.48	181.25	2.94	2068.47	326.408	93.7526	12.3823
90	194100495	1	2013	2	25	93.5	43.75	3	659.712	46.7685	35.7516	40.9426
90	194100495	0	2013	2	25	39.16	131.25	0	0	0	53.831	8.44476
90	194100495	0	2013	2	25	100	99.5	4.36	1509.98	364.704	213.807	87.5595
327	194100497	1	2013	2	0	94.28	10	0.4	698.297	234.6	79.0695	297.921
327	194100497	0	2013	2	0	99.74	1	0.6	596.537	522.91	61.5981	252.36
327	194100497	0	2013	2	0	98.7	6.25	1.2	0	528.222	85.9603	274.287
328	194100497	1	2013	2	1	98.7	0	4.4	1461.52	149.134	92.6182	399.339
328	194100497	0	2013	2	1	98.96	2.5	2.3	0	196.194	40.2589	423.077
328	194100497	0	2013	2	1	100	0.75	3.5	1461.52	93.537	96.0318	422.865
329	194100497	1	2013	2	2	99.48	0.25	3.5	292.303	170.009	101.66	434.609
329	194100497	0	2013	2	2	97.66	14	0.1	0	129.913	69.2626	438.277
329	194100497	0	2013	2	2	99.22	3.5	0.05	2338.43	73.0758	130.642	393.141
330	194100497	1	2013	2	5	95.58	8.75	0.7	0	220.13	72.8096	426.186
330	194100497	0	2013	2	5	97.92	2	0.7	826.179	73.0758	68.7681	405.296
330	194100497	0	2013	2	5	93.5	2.25	1.6	0	268.227	104.524	431.995
331	194100497	1	2013	2	6	96.1	50	1.7	0	420.011	55.093	449.29
331	194100497	0	2013	2	6	90.9	1.25	1.3	1408.49	0	113.316	414.612
331	194100497	0	2013	2	6	79.72	60.25	0.9	0	0	59.3975	448.514
332	194100497	1	2013	2	7	97.66	4.25	2.4	0	0	136.141	381.333
332	194100497	0	2013	2	7	96.36	0.25	1.65	1169.21	348.206	180.702	411.741
332	194100497	0	2013	2	7	96.36	13.5	2.1	0	293.747	81.5702	328.055
334	194100497	1	2013	2	9	99.22	20	1.5	2423.43	0	66.0677	348.659
334	194100497	0	2013	2	9	95.06	6	0.25	1053.53	119.844	40.2374	324.425
334	194100497	0	2013	2	9	91.94	30	1.5	0	443.975	24.4588	307.904
335	194100497	1	2013	2	13	87.78	4.75	0.7	1471.67	133.457	112.03	302.393
335	194100497	0	2013	2	13	94.28	0	0.2	0	133.469	163.31	335.044
335	194100497	0	2013	2	13	79.46	31.25	1.5	0	195.903	123.535	325.046
336	194100497	1	2013	2	16	97.14	6	1.4	2429.07	117.029	58.812	266.652
336	194100497	0	2013	2	16	97.66	6	0.8	1169.21	218.34	142.669	220.692
336	194100497	0	2013	2	16	99.22	5.75	0.4	913.448	527.101	69.5133	255.686
338	194100497	1	2013	2	18	97.92	0.5	0.8	2795.15	151.89	119.932	264.684
338	194100497	0	2013	2	18	99.48	2.25	1.4	0	344.148	83.8526	218.476
338	194100497	0	2013	2	18	97.66	3.75	0.4	444.561	55.2558	101.67	314.602
340	194100497	1	2013	2	20	89.08	35.5	1.4	761.223	50.7471	50.5654	348.177
340	194100497	0	2013	2	20	98.18	9.5	1.6	1477.3	154.277	47.84	290.961
340	194100497	0	2013	2	20	97.92	1.25	1	202.988	150.61	50.8227	298.117
342	194100497	1	2013	2	22	94.8	9.25	1.4	0	369.859	77.6676	305.367
342	194100497	0	2013	2	22	98.7	2.5	0.8	456.724	136.226	96.7716	260.504
342	194100497	0	2013	2	22	95.32	2	0	0	66.2819	69.9809	342.201
343	194100497	1	2013	2	24	98.44	44	0.9	3008.04	287.141	20.2426	327.78
343	194100497	0	2013	2	24	99.74	0.5	1.8	444.561	185.168	83.9132	371.617
343	194100497	0	2013	2	24	99.74	2.75	1.2	292.303	50.7471	128.69	376.293
344	194100497	1	2013	2	26	96.62	3	1	1282.9	548.031	140.339	308.75
344	194100497	0	2013	2	26	94.8	50.25	1.8	584.607	448.091	38.5694	346.143
344	194100497	0	2013	2	26	99.22	2.25	1	202.988	136.986	59.7893	339.903
345	194100497	1	2013	2	28	99.22	10.25	0.5	1826.9	557.676	51.7682	278.656
345	194100497	0	2013	2	28	91.42	3	0.8	1193.07	43.2401	101.07	300.523
345	194100497	0	2013	2	28	97.66	4.75	0.4	1053.53	211.668	201.281	252.422
346	194100497	1	2013	2	34	100	1.5	2	596.537	46.7685	155.191	360.893
346	194100497	0	2013	2	34	97.92	6.75	2.6	0	40.0965	99.1294	316.472
346	194100497	0	2013	2	34	96.62	21.25	1.4	1867.51	40.0965	80.2321	354.278
347	194100497	1	2013	2	36	86.74	3.25	0.3	653.171	385.242	79.0557	264.721
347	194100497	0	2013	2	36	100	0.5	1.6	4396.48	220.559	181.941	262.943
347	194100497	0	2013	2	36	100	3.25	0	1826.9	166.396	141.153	284.241
348	194100497	1	2013	2	48	93.76	61.25	0.3	811.953	116.316	121.714	11.511
348	194100497	0	2013	2	48	0.16	179.75	1.1	292.303	0	0	5.02142
348	194100497	0	2013	2	48	90.38	80	2.7	0	377.558	55.7023	6.62202
125	194100500	1	2013	2	1	99.22	29	0.5	292.303	569.577	175.078	121.687
125	194100500	0	2013	2	1	96.1	66	1.4	1109.9	344.228	23.7068	116.04
125	194100500	0	2013	2	1	98.44	51.75	3.6	0	267.637	109.435	111.831
126	194100500	1	2013	2	2	96.36	46.5	0.5	292.303	577.47	23.8615	115.486
126	194100500	0	2013	2	2	96.88	47.25	0.4	924.725	473.865	164.771	150.287
126	194100500	0	2013	2	2	95.32	41	1.8	241.573	239.351	102.307	122.153
127	194100500	1	2013	2	3	92.98	36.25	0.6	2996.11	282.487	132.01	102.485
127	194100500	0	2013	2	3	95.32	68.25	0.2	1498.09	386.771	67.2348	107.787
127	194100500	0	2013	2	3	97.4	52.5	0.8	1065.69	814.28	107.938	89.7731
128	194100500	1	2013	2	4	97.14	78.25	0.8	202.988	133.469	90.1433	114.731
128	194100500	0	2013	2	4	98.44	55.5	2.8	202.988	271.677	111.726	120.908
128	194100500	0	2013	2	4	98.18	61	0.4	0	655.704	93.3747	107.007
129	194100500	1	2013	2	5	98.44	46.5	2.4	1447.32	330.959	48.1745	139.24
129	194100500	0	2013	2	5	95.06	63.5	1.2	647.55	86.4803	72.7155	129.565
129	194100500	0	2013	2	5	95.84	39	2.4	0	383.418	0	138.949
130	194100500	1	2013	2	6	97.4	38.25	1.6	0	297.109	158.981	138.745
130	194100500	0	2013	2	6	98.18	6	0.4	0	806.156	89.6463	125.337
130	194100500	0	2013	2	6	96.88	0	1.6	945.475	473.881	141.206	181.602
131	194100500	1	2013	2	7	85.7	45.25	0.5	292.303	493.179	30.91	56.8334
131	194100500	0	2013	2	7	97.66	4.75	2	292.303	531.099	55.5525	91.7172
131	194100500	0	2013	2	7	98.18	10.25	1.4	241.573	484.519	179.982	43.6584
132	194100500	1	2013	2	8	95.84	47.5	0.6	811.953	495.754	16.5705	50.9775
132	194100500	0	2013	2	8	96.88	20.25	0.2	292.303	852.894	0	7.95656
132	194100500	0	2013	2	8	95.84	23.75	1.3	602.441	495.045	29.6238	95.4361
280	251122609	1	2013	2	2	100	33.25	4.32	0	0	192.164	106.007
280	251122609	0	2013	2	2	100	105.5	5.24	4465.74	0	255.648	149.122
280	251122609	0	2013	2	2	100	157.25	3.38	0	0	147.873	118.814
281	251122609	1	2013	2	3	98.7	160.75	4.06	0	95.3523	241.306	209.665
281	251122609	0	2013	2	3	100	161.5	5.18	0	40.0965	259.268	163.415
281	251122609	0	2013	2	3	97.14	169.75	4.74	0	123.433	190.23	262.677
282	251122609	1	2013	2	4	96.36	38.25	3.4	0	0	335.145	186.538
282	251122609	0	2013	2	4	99.22	182.75	4.525	0	0	163.513	154.801
282	251122609	0	2013	2	4	100	133.5	4.46	0	0	252.27	194.462
283	251122609	1	2013	2	5	96.62	174	3.34	2119.2	376.37	231.689	173.391
283	251122609	0	2013	2	5	82.58	197	4.28	0	73.0758	197.159	136.513
283	251122609	0	2013	2	5	100	78	3.78	1826.9	80.9704	370.05	221.746
284	251122609	1	2013	2	6	99.48	145	4.86	0	0	224.101	194.51
284	251122609	0	2013	2	6	99.74	91	4.16	0	55.2558	181.387	182.94
284	251122609	0	2013	2	6	99.48	176.5	4.84	0	163.53	186.594	213.01
285	251122609	1	2013	2	7	97.66	152.5	5.5	0	107.162	239.405	195.384
285	251122609	0	2013	2	7	99.74	140.25	3.64	0	123.823	87.3088	231.301
285	251122609	0	2013	2	7	99.22	141.75	4.86	0	90.2171	126.749	230.421
286	251122609	1	2013	2	8	97.92	162	5.44	0	172.961	167.647	255.165
286	251122609	0	2013	2	8	98.96	129.75	5.3	1169.21	60.3932	85.6743	305.219
286	251122609	0	2013	2	8	94.02	126.25	5.56	1826.9	0	136.65	276.298
287	251122609	1	2013	2	9	96.88	70.5	3.54	0	187.349	57.8015	288.424
287	251122609	0	2013	2	9	98.96	157.25	4.1	0	46.7685	125.631	293.896
287	251122609	0	2013	2	9	98.7	68.25	3.48	241.573	174.574	156.943	261.811
288	251122609	1	2013	2	11	94.54	39.5	4.5	0	176.681	61.9908	262.912
288	251122609	0	2013	2	11	98.7	142.75	5.02	1408.49	348.486	87.008	303.177
288	251122609	0	2013	2	11	94.1067	126.75	3.72	0	117.029	203.192	225.782
289	251122609	1	2013	2	12	93.76	190.25	4.7	0	0	61.3319	115.836
289	251122609	0	2013	2	12	99.22	88.25	1.24	0	0	183.948	152.419
289	251122609	0	2013	2	12	99.74	140.75	4.34	360.868	40.0965	198.508	174.192
290	251122609	1	2013	2	14	93.76	190.25	4.7	0	0	61.3319	119.152
290	251122609	0	2013	2	14	99.74	140.75	4.34	360.868	40.0965	198.508	174.192
290	251122609	0	2013	2	14	99.74	179.75	4.32	0	0	79.3341	150.69
292	251122609	1	2013	2	16	98.96	200	3.44	749.027	149.134	27.0468	8.95012
292	251122609	0	2013	2	16	100	196.5	5.46	3592.65	0	19.3971	39.8013
292	251122609	0	2013	2	16	91.68	196	5.5	698.297	0	47.828	47.8083
293	251122609	1	2013	2	18	77.9	197.25	3.04	1826.9	0	135.484	96.1121
293	251122609	0	2013	2	18	99.22	191.25	4.54	811.953	0	216.388	123.654
293	251122609	0	2013	2	18	97.14	188.75	6.72	292.303	50.7471	99.0181	69.6795
294	251122609	1	2013	2	20	90.38	187.5	6.66	0	323.709	55.9602	7.18142
294	251122609	0	2013	2	20	99.22	199.5	3.675	0	90.2171	44.9919	30.4505
294	251122609	0	2013	2	20	96.88	200	4.36	749.027	149.134	27.0468	12.2494
295	251122609	1	2013	2	22	91.16	86.25	2.7	2577.7	40.0965	47.7404	83.3183
295	251122609	0	2013	2	22	99.74	163.25	3.46	811.953	0	30.0111	42.9929
295	251122609	0	2013	2	22	100	194	5.84	1053.53	0	122.994	19.2732
296	251122609	1	2013	2	24	94.02	136.75	3.1	811.953	172.961	154.257	2.2595
296	251122609	0	2013	2	24	97.66	46	6.2	0	120.786	120.035	7.85294
296	251122609	0	2013	2	24	97.92	50.25	3.9	0	0	92.1753	27.5108
297	251122609	1	2013	2	26	100	34.75	4.9	0	170.009	214.599	57.5962
297	251122609	0	2013	2	26	100	172	3.46	1408.49	176.681	86.0714	14.6657
297	251122609	0	2013	2	26	98.96	133.25	3.24	360.868	101.143	181.757	86.8845
298	251122609	1	2013	2	28	98.96	24.25	0.7	0	324.851	172.331	7.12346
298	251122609	0	2013	2	28	7.44	97	1.9	652.358	195.213	113.668	20.8619
298	251122609	0	2013	2	28	1.2	82.75	2.4	652.358	195.213	113.668	27.275
299	251122609	1	2013	2	30	95.32	138	0	1625.94	0	0	20.5122
299	251122609	0	2013	2	30	0.16	25	0	652.358	195.213	113.668	56.1971
299	251122609	0	2013	2	30	95.58	199	3.6	811.953	274.598	0	29.9784
300	251122609	1	2013	2	32	87.52	138	0	1625.94	0	0	16.6586
300	251122609	0	2013	2	32	0.16	25	0	652.358	195.213	113.668	44.1511
300	251122609	0	2013	2	32	0.16	38.75	0	652.358	195.213	113.668	44.1543
301	251122609	1	2013	2	34	100	200	0	1765.75	0	0	16.2436
301	251122609	0	2013	2	34	100	25	0	652.358	195.213	113.668	68.2414
301	251122609	0	2013	2	34	17.84	158.75	0	652.358	195.213	113.668	36.2824
302	251122609	1	2013	2	38	46.7	129.25	0	0	0	0	34.1951
302	251122609	0	2013	2	38	0.16	25	0	652.358	195.213	113.668	72.7868
302	251122609	0	2013	2	38	52.42	111.25	0	811.953	0	0	11.6192
257	251122611	1	2013	2	5	98.7	3	0.4	0	412.312	57.3188	135.61
257	251122611	0	2013	2	5	100	4.75	1.4	811.953	266.898	36.9779	115.047
257	251122611	0	2013	2	5	96.36	4.25	2.4	1981.17	0	99.0833	91.3547
303	251122611	1	2013	2	1	99.48	24.75	3.42	4177.25	121.538	179.315	160.013
303	251122611	0	2013	2	1	100	17.5	4.44	202.988	113.172	232.291	197.658
303	251122611	0	2013	2	1	98.7	52	3.66	202.988	220.987	157.334	114.76
304	251122611	1	2013	2	2	99.48	35.75	3.56	1372.2	93.537	156.738	74.3598
304	251122611	0	2013	2	2	97.92	39.25	4.46	292.303	531.205	120.298	30.2314
304	251122611	0	2013	2	2	100	11	3.24	1410.79	377.737	131.529	114.434
305	251122611	1	2013	2	4	100	36	3.5	241.573	0	177.101	94.7526
305	251122611	0	2013	2	4	96.1	34.75	3.66	241.573	274.709	125.778	61.0756
305	251122611	0	2013	2	4	91.16	86.5	8.1	0	109.522	99.6525	48.7824
307	251122611	1	2013	2	7	94.8	10.25	0.9	0	429.262	60.8608	31.9598
307	251122611	0	2013	2	7	96.62	24.75	2.1	456.724	519.428	112.452	4.4186
307	251122611	0	2013	2	7	92.72	29.75	1.1	811.953	124.211	115.967	44.2364
308	251122611	1	2013	2	9	90.38	30.25	2.2	0	533.771	105.691	40.4166
308	251122611	0	2013	2	9	93.76	14.25	2.4	0	0	187.61	31.0863
308	251122611	0	2013	2	9	95.84	4.5	2.4	1414.13	0	149.693	58.6729
309	251122611	1	2013	2	11	93.24	20.75	1.1	0	448.887	30.7474	48.4927
309	251122611	0	2013	2	11	96.1	11.25	2.6	817.592	0	132.03	87.4895
309	251122611	0	2013	2	11	96.88	1.75	0.4	360.868	339.215	122.206	17.4973
311	251122611	1	2013	2	14	92.46	42.25	1.2	1169.21	283.137	107.594	3.80783
311	251122611	0	2013	2	14	92.2	25.5	1.6	1826.9	567.451	15.0983	10.4942
311	251122611	0	2013	2	14	74.26	18.25	1	0	127.739	59.8194	6.63146
313	251122611	1	2013	2	16	93.5	69.25	2	0	150.608	187.993	22.7748
313	251122611	0	2013	2	16	96.62	33.25	2	957.405	466.792	57.1063	17.8489
313	251122611	0	2013	2	16	94.8	43	1.5	0	206.709	112.792	65.1682
315	251122611	1	2013	2	18	96.62	5.75	2.6	5673.54	55.2558	77.9829	31.2871
315	251122611	0	2013	2	18	96.88	4.5	1.1	241.573	302.873	104.878	80.5924
315	251122611	0	2013	2	18	94.28	16.75	1.7	0	239.242	133.522	60.4854
318	251122611	1	2013	2	20	93.76	21	0.2	1053.53	187.349	20.2938	37.1757
318	251122611	0	2013	2	20	78.16	15.5	0.1	0	93.537	8.99671	4.25441
318	251122611	0	2013	2	20	96.36	37.25	1.9	0	349.642	51.9773	2.58451
320	251122611	1	2013	2	22	90.38	79	2.2	0	172.961	111.183	21.1534
320	251122611	0	2013	2	22	94.8	19.25	1.5	811.953	145.264	126.193	50.6668
320	251122611	0	2013	2	22	94.54	43.75	0.5	1617.38	210.061	18.9838	11.5899
322	251122611	1	2013	2	24	89.6	19	2.1	241.573	271.276	150.302	72.2683
322	251122611	0	2013	2	24	95.84	8	2.3	596.537	246.036	105.02	113.523
322	251122611	0	2013	2	24	97.66	11	1.2	721.736	439.859	78.7887	46.9977
324	251122611	1	2013	2	26	95.84	12.5	0.85	736.865	320.948	43.7912	47.228
324	251122611	0	2013	2	26	96.1	19	0.6	596.537	73.0758	232.891	87.1337
324	251122611	0	2013	2	26	95.84	13	1.7	0	601.209	88.8178	18.9593
325	251122611	1	2013	2	28	96.1	35.75	1	1256.25	164.928	69.1247	42.1674
325	251122611	0	2013	2	28	97.66	12.75	2	444.561	174.507	140.767	2.96552
325	251122611	0	2013	2	28	97.4	35.25	1.4	0	220.13	78.1657	29.3131
692	251122615	1	2014	2	1	92.72	58.75	2.64	0	0	129.565	200.797
692	251122615	0	2014	2	1	88.04	53.25	3.48	0	0	126.33	206.898
692	251122615	0	2014	2	1	89.34	99.5	3.5	0	0	90.9457	143.014
693	251122615	1	2014	2	4	97.66	80.5	3.52	1408.49	50.7471	248.86	120.82
693	251122615	0	2014	2	4	97.92	90.5	3	202.988	66.2819	155.383	139.437
693	251122615	0	2014	2	4	86.22	140.25	3.32	0	0	87.7618	86.6645
694	251122615	1	2014	2	6	94.8	107.25	3.04	811.953	0	69.9682	70.9295
694	251122615	0	2014	2	6	93.76	182.5	3.14	0	0	63.8184	103.822
694	251122615	0	2014	2	6	95.06	180.75	3.88	360.868	0	37.8564	78.9116
695	251122615	1	2014	2	7	92.2	119	3.48	0	0	84.5846	102.911
695	251122615	0	2014	2	7	92.46	145	3.06	0	331.352	120.236	147.294
695	251122615	0	2014	2	7	88.04	48	3.12	0	359.743	53.4552	112.926
696	251122615	1	2014	2	10	96.88	161	4.5	888.841	40.0965	72.3957	59.0296
696	251122615	0	2014	2	10	94.54	28.5	2.4	659.712	172.961	112.055	114.27
696	251122615	0	2014	2	10	98.7	129	2.68	0	0	94.8207	38.7178
697	251122615	1	2014	2	12	87.52	159.75	1.84	0	40.0965	214.697	126.104
697	251122615	0	2014	2	12	87.52	159	2.98	0	213.057	61.2457	76.1429
697	251122615	0	2014	2	12	89.6	114.5	2.38	241.573	0	133.062	103.96
698	251122615	1	2014	2	13	91.94	65	2.84	0	40.0965	172.732	67.72
698	251122615	0	2014	2	13	88.04	99.25	2.7	0	86.4803	160.369	124.461
698	251122615	0	2014	2	13	80.5	60.25	3.18	0	126.675	164.967	123.953
699	251122615	1	2014	2	15	88.3	47	2.46	0	149.134	120.653	116.383
699	251122615	0	2014	2	15	90.12	72	2.22	0	160.949	163.837	149.947
699	251122615	0	2014	2	15	81.8	13.25	0.74	292.303	0	119.289	102.708
700	251122615	1	2014	2	16	87.78	95	3.08	0	213.057	116.918	175.716
700	251122615	0	2014	2	16	89.34	26	3.66	811.953	0	211.2	207.96
700	251122615	0	2014	2	16	94.02	66.5	2.7	0	55.2558	118.188	203.938
701	251122615	1	2014	2	18	94.02	67.5	2.62	0	43.2401	118.947	15.6837
701	251122615	0	2014	2	18	75.82	82.25	2.44	0	137.227	123.368	17.7601
701	251122615	0	2014	2	18	73.22	35.5	3.54	0	43.2401	175.165	16.4746
702	251122615	1	2014	2	19	88.82	59.25	2	360.868	149.134	128.058	193.978
702	251122615	0	2014	2	19	85.96	73	2.84	0	149.134	182.519	236.5
702	251122615	0	2014	2	19	91.68	46.75	2.2	241.573	228.216	123.673	211.104
703	251122615	1	2014	2	19	97.66	83.25	3.68	811.953	244.487	103.683	131.741
703	251122615	0	2014	2	19	98.44	95.5	3.62	0	40.0965	216.558	112.651
703	251122615	0	2014	2	19	92.46	83.25	3.9	0	129.913	24.4192	92.0305
704	251122615	1	2014	2	22	95.32	70.25	6.68	0	121.538	170.458	281.261
704	251122615	0	2014	2	22	99.48	98.75	2.08	1155.02	0	21.9335	229.86
704	251122615	0	2014	2	22	94.8	51.75	0.94	0	0	119.099	240.319
706	251122615	1	2014	2	23	90.9	43	3.04	0	322.287	133.679	175.394
706	251122615	0	2014	2	23	93.76	97.75	2.5	596.537	60.3932	52.6909	127.901
706	251122615	0	2014	2	23	95.58	92.25	1.92	0	555.157	60.3907	128.413
431	251122616	1	2014	2	1	97.4	23.25	1.55	1169.21	228.362	139.321	161.371
431	251122616	0	2014	2	1	92.46	103.5	1.45	563.857	258.656	102.942	195.215
431	251122616	0	2014	2	1	98.44	41.75	2.4	241.573	114.181	140.23	174.268
432	251122616	1	2014	2	2	95.84	36.5	2	838.11	0	149.486	180.507
432	251122616	0	2014	2	2	99.22	12	2.2	596.537	149.134	113.182	163.952
432	251122616	0	2014	2	2	93.24	52.75	2.6	241.573	0	142.443	155.298
433	251122616	1	2014	2	13	98.44	27	0.6	292.303	228.362	182.301	157.582
433	251122616	0	2014	2	13	96.36	39	0.9	811.953	302.873	97.0381	201.414
433	251122616	0	2014	2	13	98.44	37.5	1.4	749.027	40.0965	173.865	128.887
434	251122616	1	2014	2	4	98.44	50.75	0.65	456.724	215.416	120.426	166.07
434	251122616	0	2014	2	4	97.92	19.75	0.3	3095.57	269.695	16.5705	210.686
434	251122616	0	2014	2	4	99.74	77.25	0.45	202.988	129.913	52.7207	211.328
435	251122616	1	2014	2	5	99.48	8.5	0.2	292.303	147.252	86.3917	137.356
435	251122616	0	2014	2	5	97.4	35.5	1.3	0	191.152	175.929	108.893
435	251122616	0	2014	2	5	90.38	17	3.1	2222.74	46.7685	54.2829	111.347
436	251122616	1	2014	2	6	96.36	23.25	0.8	1765.75	0	197.359	140.598
436	251122616	0	2014	2	6	99.74	3.25	0.9	888.841	46.7685	115.497	88.8505
436	251122616	0	2014	2	6	98.96	11.5	0.75	241.573	377.563	139.893	96.8447
437	251122616	1	2014	2	7	93.5	44.25	2.6	0	43.2401	131.364	152.512
437	251122616	0	2014	2	7	95.84	5	0.7	360.868	129.913	155.726	106.855
437	251122616	0	2014	2	7	98.96	1.75	0.65	596.537	204.398	145.33	110.102
439	251122616	1	2014	2	8	99.22	12.25	0.5	698.297	141.239	119.586	144.34
439	251122616	0	2014	2	8	97.66	21.75	2.5	1169.21	0	162.368	154.044
439	251122616	0	2014	2	8	98.18	20.5	0.2	749.027	73.0758	86.8199	173.043
440	251122616	1	2014	2	9	92.2	36.5	1.75	533.876	201.357	75.3633	169.904
440	251122616	0	2014	2	9	98.44	10.75	1.154	811.953	0	160.097	143.068
440	251122616	0	2014	2	9	98.96	15	0.6	1169.21	214.439	89.6933	167.63
441	251122616	1	2014	2	11	99.22	9.25	1.5	495.292	50.7471	150.901	133.979
441	251122616	0	2014	2	11	96.62	18.25	2.55	811.953	0	88.2452	183.766
441	251122616	0	2014	2	11	98.44	2.5	1.9	1826.9	40.0965	106.042	87.8827
442	251122616	1	2014	2	12	98.96	13	0.12	1053.53	172.961	169.18	145.937
442	251122616	0	2014	2	12	98.7	0	3.36	0	0	83.5884	112.005
442	251122616	0	2014	2	12	96.88	11.5	2.1	0	301.438	89.8519	179.101
443	251122616	1	2014	2	13	99.74	6.5	0.7	0	254.524	119.734	145.003
443	251122616	0	2014	2	13	99.74	3.5	1.2	292.303	337.859	54.0843	103.176
443	251122616	0	2014	2	13	98.44	6.5	1.9	456.724	80.9704	109.111	146.8
444	251122616	1	2014	2	14	97.92	21.25	1.8	0	0	175.916	156.565
444	251122616	0	2014	2	14	97.66	13	1.49	202.988	50.7471	51.9612	117.356
444	251122616	0	2014	2	14	96.1	11	1.24	1294.83	73.0758	86.276	106.972
445	251122616	1	2014	2	15	97.92	15.75	1.04	1396.56	149.134	82.7676	154.072
445	251122616	0	2014	2	15	81.02	75.5	3.3	0	0	88.1468	203.738
445	251122616	0	2014	2	15	96.88	7	3.6	0	0	102.563	112.512
446	251122616	1	2014	2	17	93.5	19	0.44	0	0	144.38	183.348
446	251122616	0	2014	2	17	97.66	24.5	0.6	957.405	0	109.245	226.386
446	251122616	0	2014	2	17	95.84	18.5	2.04	456.724	0	80.1713	134.123
447	251122616	1	2014	2	18	96.1	11.5	0.44	456.724	0	54.2806	137.912
447	251122616	0	2014	2	18	97.14	3.5	0.5	292.303	147.912	173.274	109.464
447	251122616	0	2014	2	18	98.18	6.5	1.4	811.953	90.2171	153.712	91.3547
448	251122616	1	2014	2	19	98.44	4.75	3.5	2981.92	86.4803	90.0561	118.702
448	251122616	0	2014	2	19	99.22	1	0.75	456.724	40.0965	162.807	72.5516
448	251122616	0	2014	2	19	97.14	23	2.1	0	0	152.576	160.741
449	251122616	1	2014	2	21	89.6	32	1.1	0	129.913	75.1863	151.051
449	251122616	0	2014	2	21	97.14	53.5	0.05	2187.76	313.831	120.697	207.704
449	251122616	0	2014	2	21	97.4	17.5	2.2	659.712	274.103	80.819	202.726
450	251122616	1	2014	2	24	94.8	13.25	0.8	811.953	176.681	135.666	122.438
450	251122616	0	2014	2	24	96.62	3.5	1.25	0	0	167.975	146.686
450	251122616	0	2014	2	24	99.48	0	1.65	405.977	147.252	145.019	74.5414
451	251122616	1	2014	2	26	98.44	5.25	1.3	596.537	214.439	194.37	112.989
451	251122616	0	2014	2	26	99.22	8.25	3.44	596.537	240.827	108.633	160.63
451	251122616	0	2014	2	26	98.44	8.25	0.4	913.448	336.867	86.55	150.142
452	251122616	1	2014	2	28	96.62	7	2.7	0	0	102.563	104.771
452	251122616	0	2014	2	28	98.44	2.5	0.8	202.988	0	108.339	77.815
452	251122616	0	2014	2	28	96.36	12.75	1.75	0	0	218.74	155.788
453	251122616	1	2014	2	29	97.14	40	4.25	1053.26	182.113	113.862	139.807
453	251122616	0	2014	2	29	96.62	7.25	1.9	698.297	0	154.326	141.058
453	251122616	0	2014	2	29	97.92	9.25	2.1	0	73.0758	141.556	86.4133
454	251122616	1	2014	2	31	97.14	54.25	0.8	0	121.067	161.078	253.676
454	251122616	0	2014	2	31	97.4	9.5	0.7	811.953	0	114.72	234.007
454	251122616	0	2014	2	31	96.88	58.75	0.8	1053.26	337.058	84.6943	230.64
455	251122616	1	2014	2	33	97.4	0.25	1.7	1053.26	172.961	72.6967	315.455
455	251122616	0	2014	2	33	96.36	5.5	3.6	563.857	0	68.8872	368.185
455	251122616	0	2014	2	33	92.46	19.25	0.8	1765.75	129.913	86.4264	313.35
498	251122617	1	2014	2	1	94.02	17.25	2.2	596.537	434.399	153.471	212.605
498	251122617	0	2014	2	1	96.1	24.75	0	894.744	494.371	39.6205	194.178
498	251122617	0	2014	2	1	97.92	0	1.1	4861.32	360.968	18.269	202.185
499	251122617	1	2014	2	4	88.3	41.75	0.9	0	40.0965	105.373	227.741
499	251122617	0	2014	2	4	95.84	80.25	0.9	2996.11	294.607	54.1722	228.204
499	251122617	0	2014	2	4	98.44	0	3	1510.25	236.291	90.5012	182.712
500	251122617	1	2014	2	6	97.66	74.5	1	596.537	90.0086	150.595	258.139
500	251122617	0	2014	2	6	97.92	16.75	0.7	749.027	322.095	32.4943	261.543
500	251122617	0	2014	2	6	93.24	14.5	0.7	596.537	154.046	115.771	258.336
501	251122617	1	2014	2	8	98.18	30.25	2.6	913.448	129.913	81.9692	247.591
501	251122617	0	2014	2	8	96.1	22	1.1	202.988	148.793	74.5672	204.354
501	251122617	0	2014	2	8	96.1	31.25	0	483.146	157.421	37.2836	186.475
502	251122617	1	2014	2	10	96.62	42.75	2.2	456.724	0	26.7415	262.754
502	251122617	0	2014	2	10	92.46	9.25	3.1	0	0	28.2626	308.264
502	251122617	0	2014	2	10	97.14	52.5	1.1	292.303	46.7685	120.096	254.871
503	251122617	1	2014	2	12	92.98	32.25	2.4	202.988	50.7471	64.6095	292.34
503	251122617	0	2014	2	12	95.32	31.25	0.8	0	133.457	61.4772	338.328
503	251122617	0	2014	2	12	97.14	49.5	1.4	563.857	0	47.2599	267.394
504	251122617	1	2014	2	14	90.64	108.75	1.2	0	66.2819	47.0131	240.827
504	251122617	0	2014	2	14	94.28	33.5	1.6	292.303	114.181	60.9568	285.035
504	251122617	0	2014	2	14	93.5	19.25	0.8	0	0	40.2118	252.283
505	251122617	1	2014	2	16	98.18	59	1.6	2187.76	209.528	20.2426	262.485
505	251122617	0	2014	2	16	94.54	27.25	1.8	1053.26	43.2401	35.1655	302.804
505	251122617	0	2014	2	16	97.66	54	1.8	838.11	114.181	99.4107	241.287
506	251122617	1	2014	2	18	99.22	87.25	3.4	0	40.0965	34.8619	256.591
506	251122617	0	2014	2	18	97.92	44.5	1.6	241.573	0	52.2496	237.587
506	251122617	0	2014	2	18	97.92	18.75	0.4	0	246.942	108.074	229.793
507	251122617	1	2014	2	20	95.58	57.75	1.2	2058.05	106.378	75.6681	221.797
507	251122617	0	2014	2	20	69.84	11.25	0	0	0	41.8508	185.729
507	251122617	0	2014	2	20	93.76	13.5	2	811.953	223.703	15.0983	270.984
508	251122617	1	2014	2	21	94.02	50.25	1.74	563.857	293.205	78.9423	233.446
508	251122617	0	2014	2	21	95.32	20.25	2.4	838.11	213.057	99.6956	288.487
508	251122617	0	2014	2	21	96.88	23.25	0.84	0	209.528	95.3953	272.175
509	251122617	1	2014	2	22	97.4	15.25	2.2	1372.2	0	23.4123	271.65
509	251122617	0	2014	2	22	97.14	63.5	2.6	0	90.8436	71.2449	273.438
509	251122617	0	2014	2	22	96.88	72.5	3.4	241.573	0	36.0548	243.456
510	251122617	1	2014	2	23	94.8	15.5	0.32	202.988	101.143	134.35	206.133
510	251122617	0	2014	2	23	92.46	27.5	1.3	799.526	151.89	101.052	167.829
510	251122617	0	2014	2	23	96.62	72.75	0.92	1700.79	55.2558	75.8492	231.736
511	251122617	1	2014	2	24	98.96	8.5	1	0	314.171	58.5192	221.351
511	251122617	0	2014	2	24	75.56	46.5	0.2	0	0	44.2301	180.482
511	251122617	0	2014	2	24	94.54	35	1	2271.46	525.955	37.2836	174.529
514	251122617	1	2014	2	10	96.62	30.5	4.2	1198.98	43.2401	137.503	381.586
514	251122617	0	2014	2	10	98.7	79.5	2.2	0	0	106.238	346.938
514	251122617	0	2014	2	10	98.18	89	2	2638.85	343.162	103.46	360.672
525	251122620	1	2014	2	3	98.44	14.5	2.2	698.297	80.1929	177.54	174.845
525	251122620	0	2014	2	3	94.28	1.75	0.56	1865.21	0	160.209	166.106
525	251122620	0	2014	2	3	92.72	38.75	1.6	0	129.913	55.5362	213.406
526	251122620	1	2014	2	4	96.1	38	2	0	46.7685	192.742	174.61
526	251122620	0	2014	2	4	99.48	44.25	3.2	360.868	353.62	111.204	214.585
526	251122620	0	2014	2	4	99.74	0	2.6	2283.62	103.633	139.005	238.932
527	251122620	1	2014	2	5	96.1	3.75	1.7	292.303	0	181.238	157.97
527	251122620	0	2014	2	5	96.88	4.5	0.58	1169.21	172.961	139.347	159.405
527	251122620	0	2014	2	5	96.62	5.5	1.54	533.876	40.0965	114.943	182.53
528	251122620	1	2014	2	7	97.66	2.25	2	811.953	0	185.032	258.539
528	251122620	0	2014	2	7	95.84	33.25	1.9	360.868	0	148.66	246.124
528	251122620	0	2014	2	7	95.58	0.75	1.8	202.988	0	114.724	264.491
529	251122620	1	2014	2	9	96.62	16.75	1.9	1826.9	0	120.074	243.027
529	251122620	0	2014	2	9	97.14	0	2.5	1414.13	172.961	153.474	214.181
529	251122620	0	2014	2	9	97.66	2.5	1.4	653.171	149.134	207.303	201.234
530	251122620	1	2014	2	10	98.18	28	3	721.736	46.7685	168.916	213.285
530	251122620	0	2014	2	10	98.96	15.25	3.6	653.171	86.865	141.315	167.031
530	251122620	0	2014	2	10	97.66	43.75	3.2	1986.81	0	185.422	180.203
531	251122620	1	2014	2	12	97.92	10.75	2.4	0	0	82.9781	248.836
531	251122620	0	2014	2	12	98.44	19.5	2.5	1981.17	0	216.516	286.293
531	251122620	0	2014	2	12	96.62	36.75	0.7	817.592	50.7471	167.008	196.575
532	251122620	1	2014	2	14	97.14	60	1.4	811.953	0	184.101	251.894
532	251122620	0	2014	2	14	97.4	29.75	3	2996.11	50.7471	109.804	283.509
532	251122620	0	2014	2	14	98.44	20	1.8	1408.49	172.961	102.365	238.068
533	251122620	1	2014	2	16	98.18	20.75	1.9	456.724	90.8436	86.9458	215.935
533	251122620	0	2014	2	16	97.66	65	3	1826.9	46.7685	189.886	166.746
533	251122620	0	2014	2	16	98.44	50	2	3653.79	66.2819	64.604	213.713
534	251122620	1	2014	2	18	99.48	21	2.5	1169.21	151.237	199.237	188.686
534	251122620	0	2014	2	18	99.22	31.75	1.8	1769.36	179.466	130.086	239.593
534	251122620	0	2014	2	18	90.38	44.5	3.2	811.953	0	116.557	203.842
535	251122620	1	2014	2	20	98.44	50	2	3653.79	66.2819	64.604	210.178
535	251122620	0	2014	2	20	99.22	48.75	2.6	659.712	43.2401	153.033	209.704
535	251122620	0	2014	2	20	97.4	84.75	2	596.537	43.2401	160.889	187.754
536	251122620	1	2014	2	22	97.92	8.75	2.6	3387.88	40.0965	112.055	145.375
536	251122620	0	2014	2	22	87.78	44.25	3.4	0	0	135.069	114.638
536	251122620	0	2014	2	22	98.96	51.5	2.6	1826.9	43.2401	170.206	180.563
537	251122620	1	2014	2	24	92.2	30.5	2.6	1130.41	263.315	84.0791	210.479
537	251122620	0	2014	2	24	99.22	44	1.8	2005.03	0	175.778	164.844
537	251122620	0	2014	2	24	98.96	44.75	2.8	0	276.594	178.947	186.697
538	251122620	1	2014	2	26	97.66	21.25	2.4	241.573	549.919	3.23882	44.1214
538	251122620	0	2014	2	26	98.96	31.5	4.2	202.988	0	102.667	61.2728
538	251122620	0	2014	2	26	98.96	21.5	4.2	811.953	260.895	133.097	98.7243
539	251122620	1	2014	2	28	98.18	77	2.2	1104.26	121.538	150.941	239.774
539	251122620	0	2014	2	28	98.7	41.5	3	1625.94	90.8436	182.82	193.023
539	251122620	0	2014	2	28	98.18	28.75	1.8	1826.9	98.4959	205.889	226.564
591	251122621	1	2014	2	1	94.54	56.25	0.8	292.303	101.143	83.5332	5.28697
591	251122621	0	2014	2	1	96.1	4.25	1.8	888.841	0	108.418	20.6122
591	251122621	0	2014	2	1	98.18	5.75	1.8	292.303	101.143	211.783	16.626
592	251122621	1	2014	2	2	96.88	35.75	3.2	1169.21	95.3523	75.5971	22.4546
592	251122621	0	2014	2	2	88.56	16.25	1.3	444.561	187.257	75.9876	18.465
592	251122621	0	2014	2	2	91.94	18.5	1.8	292.303	90.2171	112.307	23.4193
593	251122621	1	2014	2	6	98.44	54.75	2.8	811.953	0	213.987	28.5063
593	251122621	0	2014	2	6	92.46	4	2	0	181.336	134.637	81.1375
593	251122621	0	2014	2	6	98.44	10.5	1.6	444.561	145.473	95.1079	70.2623
594	251122621	1	2014	2	7	95.84	5	1.2	0	288.216	15.8087	64.5312
594	251122621	0	2014	2	7	97.92	15	0.5	1169.21	149.134	176.965	10.105
594	251122621	0	2014	2	7	92.2	5	0.5	811.953	296.646	103.581	99.7138
595	251122621	1	2014	2	8	95.32	5.5	0.6	1826.9	103.633	151.455	93.4914
595	251122621	0	2014	2	8	98.7	6	2.2	0	149.134	138.729	117.324
595	251122621	0	2014	2	8	92.98	53.25	2.9	0	0	156.771	132.537
596	251122621	1	2014	2	9	95.58	30.25	1.8	888.841	333.08	164.799	66.5384
596	251122621	0	2014	2	9	97.4	8	1.5	1802.55	172.961	92.8821	28.6312
596	251122621	0	2014	2	9	97.92	3.25	2	360.868	238.102	110.89	116.717
597	251122621	1	2014	2	10	98.44	6	1.2	811.953	0	46.5176	29.7033
597	251122621	0	2014	2	10	98.18	13.5	1.6	0	333.35	90.2565	14.3062
597	251122621	0	2014	2	10	96.88	7.25	1.7	2423.43	40.0965	56.2028	68.5137
598	251122621	1	2014	2	11	97.92	6.5	2.2	1053.53	283.252	140.349	53.2673
598	251122621	0	2014	2	11	97.14	2.25	0.8	0	383.648	131.991	75.1009
598	251122621	0	2014	2	11	98.7	73.75	1.6	0	333.128	144.291	16.2148
599	251122621	1	2014	2	12	95.84	8.25	2.2	596.537	0	182.978	124.092
599	251122621	0	2014	2	12	94.8	1.25	1.2	360.868	185.569	86.5419	135.555
599	251122621	0	2014	2	12	95.32	41.25	2.8	0	471.642	87.1719	76.1196
601	251122621	1	2014	2	14	98.44	28.75	2	360.868	60.3932	118.077	109.97
601	251122621	0	2014	2	14	93.24	17.75	0.9	456.724	176.323	235.013	64.8271
601	251122621	0	2014	2	14	97.4	3.75	2	0	204.398	141.255	98.6899
602	251122621	1	2014	2	15	99.48	10	2	0	103.633	95.8685	62.8387
602	251122621	0	2014	2	15	95.32	5.5	0.6	1826.9	103.633	128.901	104.464
602	251122621	0	2014	2	15	96.1	42.75	2.2	3808.06	166.772	41.2501	90.5981
604	251122621	1	2014	2	17	97.66	25.75	1.7	0	380.564	127.02	17.5637
604	251122621	0	2014	2	17	92.2	34.5	2.4	0	334.365	76.136	24.4357
604	251122621	0	2014	2	17	93.24	45.25	2.2	0	153.752	215.7	9.51163
605	251122621	1	2014	2	18	97.92	3.25	1.2	292.303	0	90.0431	63.7751
605	251122621	0	2014	2	18	97.92	8.75	2	862.701	183.587	131.102	22.5121
605	251122621	0	2014	2	18	99.48	8.75	0.6	0	0	79.0426	20.6994
606	251122621	1	2014	2	19	95.06	43.25	2.4	0	241.245	89.789	96.2547
606	251122621	0	2014	2	19	94.28	1.25	1.4	1014.94	40.0965	119.331	103.538
606	251122621	0	2014	2	19	96.62	1.25	0.6	0	272.957	171.697	128.645
607	251122621	1	2014	2	20	87.26	9	0.6	0	160.949	185.964	12.6733
607	251122621	0	2014	2	20	75.56	8.75	0.8	0	185.569	102.213	0.528244
607	251122621	0	2014	2	20	97.14	44.25	1.1	2875.91	80.9704	78.9065	9.60702
608	251122621	1	2014	2	21	97.92	5.75	0.8	0	43.2401	136.413	66.9433
608	251122621	0	2014	2	21	94.02	6.75	1.6	1053.53	287.141	119.025	85.1705
608	251122621	0	2014	2	21	98.7	3.75	1.2	533.876	73.0758	171.617	31.0654
609	251122621	1	2014	2	22	98.7	26.5	2.6	3476.96	509.004	181.997	101.006
609	251122621	0	2014	2	22	96.62	0.5	1.2	495.292	130.314	170.261	101.142
609	251122621	0	2014	2	22	77.9	22.75	0.7	0	0	84.1128	148.968
610	251122621	1	2014	2	23	96.88	25.25	2.5	1169.21	269.475	181.783	111.354
610	251122621	0	2014	2	23	96.62	0.5	1	0	261.63	138.609	142.968
610	251122621	0	2014	2	23	98.18	2	2.8	799.526	40.0965	168.177	74.6327
611	251122621	1	2014	2	24	98.44	37.5	3	292.303	46.7685	127.646	46.5443
611	251122621	0	2014	2	24	97.14	3.25	1.4	1625.94	167.555	93.6232	88.5562
611	251122621	0	2014	2	24	98.7	10.5	2.2	811.953	302.873	45.9857	23.6568
612	251122621	1	2014	2	25	97.92	18.75	2.4	3933.95	513.785	113.961	9.10881
612	251122621	0	2014	2	25	91.42	5.75	2	0	185.168	78.3762	23.2331
612	251122621	0	2014	2	25	94.54	11.75	2.9	360.868	290.89	39.6205	33.9536
613	251122621	1	2014	2	26	98.44	7	1.4	748.729	210.039	108.726	25.8586
613	251122621	0	2014	2	26	68.8	11.25	0.8	0	149.134	82.5966	7.66325
613	251122621	0	2014	2	26	97.66	12.5	0.8	0	60.3932	121.061	31.8718
614	251122621	1	2014	2	27	98.7	24	1.4	1172.82	0	169.149	88.3917
614	251122621	0	2014	2	27	97.4	25	1.8	360.868	318.045	119.234	104.515
614	251122621	0	2014	2	27	97.92	9.25	1.2	1169.21	215.416	103.57	36.0146
616	251122621	1	2014	2	28	50.86	16.75	0	0	0	23.8615	5.15135
616	251122621	0	2014	2	28	97.14	32.75	0	360.868	172.961	13.814	37.5314
616	251122621	0	2014	2	28	96.88	25.5	1.4	1826.9	192.374	39.2912	32.0079
618	251122621	1	2014	2	31	79.46	32	0.2	2029.88	103.633	80.9881	4.4741
618	251122621	0	2014	2	31	98.18	9	1.8	0	114.181	115.736	17.8866
618	251122621	0	2014	2	31	97.66	0.5	0.5	0	330.724	71.5839	27.03
512	251122622	1	2014	2	1	99.22	52.75	2.2	2778.91	43.2401	100.059	330.904
512	251122622	0	2014	2	1	98.7	26.75	2.8	360.868	66.2819	114.248	370.717
512	251122622	0	2014	2	1	100	37	3	456.724	43.2401	135.836	286.542
513	251122622	1	2014	2	2	97.14	73.5	1	2068.47	83.3366	98.307	383.594
513	251122622	0	2014	2	2	99.48	53	0.4	0	268.796	113.766	329.512
513	251122622	0	2014	2	2	96.88	66.75	3.2	202.988	144.284	39.9429	366.246
555	251122625	1	2014	2	2	93.76	119.75	2.62	360.868	172.961	58.8913	166.236
555	251122625	0	2014	2	2	96.62	66.75	2.56	0	236.316	60.4577	163.104
555	251122625	0	2014	2	2	92.2	90.5	2.02	1471.67	0	32.026	174.786
556	251122625	1	2014	2	4	98.96	128.5	3.64	0	0	115.365	140.758
556	251122625	0	2014	2	4	95.32	105.75	5.48	957.405	280.122	64.8428	183.1
556	251122625	0	2014	2	4	95.06	104	3.76	0	0	114.189	194.992
557	251122625	1	2014	2	6	96.62	72.5	4.62	596.537	43.2401	101.804	138.582
557	251122625	0	2014	2	6	97.4	180.5	2.82	1826.9	123.433	81.5383	108.483
557	251122625	0	2014	2	6	96.62	121.5	3.88	1981.17	40.0965	190.9	135.229
559	251122625	1	2014	2	8	89.34	109	3.4	1826.9	0	134.609	172.492
559	251122625	0	2014	2	8	98.7	105.5	3.08	202.988	239.242	82.0023	155.729
559	251122625	0	2014	2	8	96.36	86.5	2.68	0	572.169	70.365	185.759
561	251122625	1	2014	2	11	91.68	81.5	2.4	1826.9	272.815	78.4131	180.297
561	251122625	0	2014	2	11	87	100.25	2.7	0	0	99.159	147.56
561	251122625	0	2014	2	11	89.34	84.25	3	0	0	142.821	210.708
562	251122625	1	2014	2	12	96.1	79.25	1.2	0	0	133.006	98.6413
562	251122625	0	2014	2	12	95.84	75.5	3.1	1625.94	0	102.741	99.0381
562	251122625	0	2014	2	12	93.5	46	1.02	0	0	96.9259	95.1574
563	251122625	1	2014	2	13	90.64	116.5	3.9	817.592	114.181	97.9743	111.513
563	251122625	0	2014	2	13	98.18	43.75	3	0	43.2401	204.125	92.0212
563	251122625	0	2014	2	13	98.96	24.25	1.3	0	114.181	79.8723	74.3994
564	251122625	1	2014	2	14	99.22	104.75	3.5	0	0	110.984	112.099
564	251122625	0	2014	2	14	99.22	85.25	3	0	46.7685	159.166	122.205
564	251122625	0	2014	2	14	97.66	90.25	3.12	0	535.877	45.5795	159.377
566	251122625	1	2014	2	16	89.86	114.5	3.66	360.868	191.36	119.164	171.751
566	251122625	0	2014	2	16	97.92	84.75	3.48	596.537	0	170.521	137.597
566	251122625	0	2014	2	16	95.84	92.75	2.86	826.179	345.329	79.1798	178.966
567	251122625	1	2014	2	18	97.92	85	2.5	0	0	64.5147	117.657
567	251122625	0	2014	2	18	94.54	142.75	2.54	596.537	50.7471	76.7817	140.07
567	251122625	0	2014	2	18	97.92	113.25	3	596.537	0	119.417	79.9011
568	251122625	1	2014	2	19	97.66	47.5	3	2699.29	263.178	17.254	166.606
568	251122625	0	2014	2	19	95.32	36.75	3.4	202.988	114.181	73.8323	125.968
568	251122625	0	2014	2	19	96.1	24.75	2	817.592	412.45	4.56724	131.137
570	251122625	1	2014	2	22	96.36	115.25	2.26	0	143.73	216.421	191.949
570	251122625	0	2014	2	22	95.06	160.25	3.18	0	0	204.393	186.221
570	251122625	0	2014	2	22	97.4	138.5	3.64	0	80.9704	154.328	204.336
571	251122625	1	2014	2	26	98.7	39	1.8	2423.43	0	79.5016	88.2203
571	251122625	0	2014	2	26	95.84	165.75	2.94	1169.21	172.961	186.376	133.375
571	251122625	0	2014	2	26	97.14	131.75	4.4	811.953	266.948	149.402	49.6516
572	251122625	1	2014	2	27	94.02	136.5	3.84	0	336.253	35.2599	165.532
572	251122625	0	2014	2	27	93.76	102.25	4.34	0	247.65	42.3708	199.703
572	251122625	0	2014	2	27	95.58	92	4.44	0	127.739	42.7101	171.043
573	251122625	1	2014	2	28	96.62	122	4.46	0	0	97.2316	116.274
573	251122625	0	2014	2	28	95.32	126.25	2.88	1981.17	0	104.175	76.9561
573	251122625	0	2014	2	28	97.92	162.75	3.84	0	95.3523	209.349	129.552
540	251122629	1	2014	2	0	96.36	66.75	4.2	1981.17	101.143	187.969	79.4478
540	251122629	0	2014	2	0	98.18	27.25	4.14	698.297	269.27	100.756	125.935
540	251122629	0	2014	2	0	95.06	35	4.26	456.724	55.2558	99.844	112.44
541	251122629	1	2014	2	1	94.02	108.5	4.62	533.876	114.181	85.5029	80.0671
541	251122629	0	2014	2	1	96.1	66.5	3.46	0	210.688	163.599	124.214
541	251122629	0	2014	2	1	99.74	193.75	4.2	0	0	96.3865	37.6381
542	251122629	1	2014	2	2	96.88	67.5	3.5	0	50.7471	110.922	112.498
542	251122629	0	2014	2	2	97.4	102.5	2.9	0	246.65	140.875	97.9939
542	251122629	0	2014	2	2	94.8	42.25	2.1	811.953	46.7685	266	117.142
543	251122629	1	2014	2	3	98.96	47	4.64	0	46.7685	170.119	102.219
543	251122629	0	2014	2	3	96.1	40.75	2.9	817.592	149.134	37.65	127.476
543	251122629	0	2014	2	3	97.92	48.5	4.54	0	500.576	70.8635	135.61
469	251122630	1	2014	2	1	90.9	119	4.44	0	257.28	138.478	70.686
469	251122630	0	2014	2	1	86.74	100.5	3.06	0	141.364	131.563	100.169
469	251122630	0	2014	2	1	83.36	132	1.04	0	128.332	99.3938	81.1304
470	251122630	1	2014	2	4	92.2	58.75	2.9	0	50.7471	123.346	82.2223
470	251122630	0	2014	2	4	82.58	94.5	5.14	0	201.407	82.8119	72.488
470	251122630	0	2014	2	4	85.18	86.5	5	0	121.538	52.2138	29.4724
471	251122630	1	2014	2	6	92.72	41	4.38	0	103.633	177.871	46.837
471	251122630	0	2014	2	6	87	50.75	2.2	0	406.414	67.0634	103.811
471	251122630	0	2014	2	6	70.1	25.25	3.38	0	220.184	97.7717	106.9
472	251122630	1	2014	2	7	89.34	144.5	4.08	0	418.331	191.646	62.6981
472	251122630	0	2014	2	7	92.46	79.75	2.64	360.868	116.316	123.552	103.871
472	251122630	0	2014	2	7	92.72	97.25	2.7	0	538.984	124.791	90.9102
473	251122630	1	2014	2	9	89.86	71.25	2.94	0	282.768	145.88	54.6526
473	251122630	0	2014	2	9	91.16	83.25	3.24	456.724	147.258	169.949	72.8166
473	251122630	0	2014	2	9	94.02	78	3.3	0	86.865	162.286	5.73252
474	251122630	1	2014	2	10	98.7	105.5	2.76	0	220.987	241.974	28.8611
474	251122630	0	2014	2	10	96.36	70.25	3.1	0	574.092	135.071	29.1668
474	251122630	0	2014	2	10	94.28	34.75	1.98	0	327.238	94.3704	30.5372
475	251122630	1	2014	2	13	94.8	89.5	1.54	202.988	423.238	84.2476	12.4543
475	251122630	0	2014	2	13	31.88	183	4.52	0	121.538	0	9.30193
475	251122630	0	2014	2	13	6.66	121.75	3.5	456.724	129.913	49.8968	21.4673
476	251122630	1	2014	2	15	92.72	75.5	0.66	659.712	190.105	34.7566	4.03127
476	251122630	0	2014	2	15	92.98	89.75	1.56	838.11	364.567	35.4478	7.12438
476	251122630	0	2014	2	15	6.4	84.5	4.98	0	55.2558	14.4347	22.3939
477	251122630	1	2014	2	17	27.2	123.25	1.42	1981.17	180.66	0	0.317828
477	251122630	0	2014	2	17	92.98	66.6667	0.68	292.303	321.327	75.5575	33.9512
477	251122630	0	2014	2	17	35.26	134.25	5.7	202.988	172.961	25.2857	2.75754
479	251122630	1	2014	2	22	88.04	147.25	0.98	1351.47	303.412	92.6703	3.60023
479	251122630	0	2014	2	22	94.28	28.75	3.74	241.573	615.344	90.0442	16.3946
479	251122630	0	2014	2	22	92.2	122	1.26	456.724	339.147	100.2	5.32002
480	251122630	1	2014	2	24	90.12	145.25	0.6	0	454.155	61.326	24.525
480	251122630	0	2014	2	24	90.64	62	1.24	1130.41	287.141	49.8471	9.90904
480	251122630	0	2014	2	24	91.68	121.25	0.92	659.712	0	88.7567	36.5547
481	251122630	1	2014	2	26	90.64	35	0.46	0	587.156	23.8615	22.6835
481	251122630	0	2014	2	26	1.2	120.25	2.22	0	0	19.2178	18.9049
481	251122630	0	2014	2	26	57.36	59.25	2.18	0	40.0965	34.244	4.24266
482	251122630	1	2014	2	27	90.38	89.25	0.92	405.977	733.908	47.7631	0.875199
482	251122630	0	2014	2	27	83.1	83	1.16	0	156.399	43.0793	3.40734
482	251122630	0	2014	2	27	85.96	73.5	1.68	360.868	151.89	76.3508	1.95124
483	251122630	1	2014	2	29	86.74	66	4.66	1053.53	319.726	98.4853	6.62441
483	251122630	0	2014	2	29	90.38	45.75	1.5	405.977	852.895	65.1517	0.875199
483	251122630	0	2014	2	29	91.42	93.25	4.46	1846.25	253.539	47.989	8.7587
484	251122630	1	2014	2	31	88.04	80.75	4.28	596.537	176.874	108.638	26.7859
484	251122630	0	2014	2	31	88.04	143	3.16	1968.74	247.742	106.911	57.6029
484	251122630	0	2014	2	31	91.16	29.25	1.46	292.303	830.139	27.9319	45.8974
485	251122630	1	2014	2	33	96.1	169.5	0.24	1014.94	512.166	0	6.71286
485	251122630	0	2014	2	33	16.28	154.75	0.8	0	346.113	30.4166	3.28597
485	251122630	0	2014	2	33	90.9	86.5	1.8	0	115.649	74.8304	8.32412
486	251122630	1	2014	2	34	87.78	90.5	0.18	0	80.9704	40.0738	4.32776
486	251122630	0	2014	2	34	0.16	0	0	0	0	0	25.8763
486	251122630	0	2014	2	34	85.7	99	1.74	0	433.485	57.7639	11.5452
487	251122630	1	2014	2	36	21.74	72	5.66	0	55.2558	58.6181	40.578
487	251122630	0	2014	2	36	88.56	20.25	2.32	292.303	882.198	0	51.3658
487	251122630	0	2014	2	36	88.56	90.25	0.48	202.988	365.726	74.7861	16.8507
758	251122630	1	2014	2	19	91.42	42.5	5.7	1294.83	237.074	55.8109	9.62698
758	251122630	0	2014	2	19	91.16	38	2	0	626.602	135.394	31.0351
758	251122630	0	2014	2	19	94.28	36.5	0.98	838.11	200.815	15.8087	6.69247
545	251122632	1	2014	2	1	100	47.25	3	1703.09	114.181	104.878	185.148
545	251122632	0	2014	2	1	99.22	120.25	3.2	3438.37	0	103.836	137.509
545	251122632	0	2014	2	1	99.74	44.25	3.4	241.573	199.881	108.243	229.903
546	251122632	1	2014	2	2	98.96	50	4.4	584.607	40.0965	53.6605	165.133
546	251122632	0	2014	2	2	97.4	106.25	1.8	1193.07	40.0965	119.847	179.535
546	251122632	0	2014	2	2	98.7	58.25	2.5	990.6	0	135.687	104.099
547	251122632	1	2014	2	3	98.44	65	2	1396.06	234.239	131.982	164.787
547	251122632	0	2014	2	3	98.44	61.75	2.8	1765.75	46.7685	149.916	122.046
547	251122632	0	2014	2	3	98.44	61.75	2.8	1765.75	46.7685	149.916	123.751
548	251122632	1	2014	2	4	99.48	55.5	2.2	1814.47	120.786	171.84	91.8804
548	251122632	0	2014	2	4	99.22	45	3	456.724	292.667	51.7682	40.6373
548	251122632	0	2014	2	4	97.92	86	0.6	456.724	204.19	83.0222	45.713
549	251122632	1	2014	2	5	97.92	133.75	1.4	1826.9	50.7471	137.015	214.586
549	251122632	0	2014	2	5	97.14	46.25	2.8	1826.9	153.147	115.49	191.052
549	251122632	0	2014	2	5	98.44	51	3.2	292.303	129.913	113.155	263.207
690	251122636	1	2014	2	1	97.92	8	0.2	2423.43	325.568	88.0372	230.152
690	251122636	0	2014	2	1	98.18	6.5	0.8	817.592	50.7471	119.243	183.501
690	251122636	0	2014	2	1	98.44	4	1.8	913.448	43.2401	117.319	197.756
726	251122637	1	2014	2	1	91.68	90.75	0.8	0	83.3366	156.76	38.1848
726	251122637	0	2014	2	1	93.24	122.5	0.86	811.953	187.733	99.1176	0.543947
726	251122637	0	2014	2	1	87.52	78.75	1.54	0	673.916	71.2613	23.0441
728	251122637	1	2014	2	3	93.24	122.75	0.86	811.953	187.733	99.1176	0.543947
728	251122637	0	2014	2	3	9.52	83.25	3.2	0	0	19.2178	12.5476
728	251122637	0	2014	2	3	1.72	172.25	6.68	652.358	195.213	113.668	17.9846
729	251122637	1	2014	2	5	91.94	107.25	1.8	659.712	321.827	43.1033	3.25544
729	251122637	0	2014	2	5	85.7	107.5	2.4	0	456.648	149.342	23.1612
729	251122637	0	2014	2	5	84.92	80.25	2.6	456.724	391.663	110.101	21.467
731	251122637	1	2014	2	7	81.8	156.25	0.38	0	409.833	89.0216	33.9687
731	251122637	0	2014	2	7	90.12	66.75	0.6	241.573	426.024	69.2006	49.9292
731	251122637	0	2014	2	7	90.12	100.25	1.08	602.441	417.455	98.6823	30.4924
733	251122637	1	2014	2	9	88.56	92	0.3	1530.08	255.917	48.4734	34.3781
733	251122637	0	2014	2	9	91.94	88.75	1.5	241.573	305.754	128.16	19.2523
733	251122637	0	2014	2	9	88.3	57	0.52	1262.14	518.289	0	4.40827
734	251122637	1	2014	2	10	95.58	198	1.34	1447.32	220.13	34.7566	0.68386
734	251122637	0	2014	2	10	89.86	77	0.36	0	358.53	39.5282	8.66855
734	251122637	0	2014	2	10	10.82	169.75	2.64	1510.25	196.619	0	8.11533
735	251122637	1	2014	2	12	84.92	187	1.28	1104.26	383.734	30.4166	12.0444
735	251122637	0	2014	2	12	88.3	137.75	0.56	2849.04	250.277	0	5.05423
735	251122637	0	2014	2	12	15.76	182.75	6.28	202.988	40.0965	0	5.04064
736	251122637	1	2014	2	14	92.98	187	3.14	1828.93	149.134	0	6.30583
736	251122637	0	2014	2	14	86.22	88.5	2.38	1014.04	129.913	25.2857	8.92299
736	251122637	0	2014	2	14	0.16	121.25	6.76	0	0	20.2426	15.2983
737	251122637	1	2014	2	16	90.38	87.5	0.44	0	295.41	19.2178	18.8371
737	251122637	0	2014	2	16	92.2	128	0.48	0	0	97.326	52.3526
737	251122637	0	2014	2	16	92.2	160.75	0.86	533.876	457.003	0	0.6075
738	251122637	1	2014	2	18	99.48	179.5	0.96	202.988	256.071	64.814	4.69299
738	251122637	0	2014	2	18	7.7	61.25	0	0	0	23.8615	16.5105
738	251122637	0	2014	2	18	99.74	153.5	2.2	0	149.134	139.277	27.6399
739	251122637	1	2014	2	20	81.28	45.25	0.98	0	342.99	40.5694	30.5839
739	251122637	0	2014	2	20	92	152.25	5.06	0	55.2558	67.7002	27.8335
739	251122637	0	2014	2	20	93.5	21	1.04	202.988	270.877	0	7.58248
740	251122637	1	2014	2	21	92.46	73.5	0	1294.83	368.863	22.5543	8.29623
740	251122637	0	2014	2	21	9.52	37.25	1.98	0	448.879	15.8087	21.7683
740	251122637	0	2014	2	21	93.76	84	3.28	405.977	496.314	158.006	36.1226
741	251122637	1	2014	2	22	85.44	64.5	1.08	292.303	199.639	20.2426	27.0264
741	251122637	0	2014	2	22	93.76	73.5	1.2	1471.67	293.13	69.5873	15.0711
741	251122637	0	2014	2	22	81.54	145	3.12	1503.71	172.961	126.153	11.347
742	251122637	1	2014	2	23	94.02	150.5	1.54	775.449	123.823	87.8489	2.08316
742	251122637	0	2014	2	23	97.4	64.25	0.96	0	364.926	0	21.8029
742	251122637	0	2014	2	23	92.98	79	0.76	495.292	0	28.5452	18.2357
743	251122637	1	2014	2	27	93.5	180.75	0.64	749.027	446.497	12.1742	6.88943
743	251122637	0	2014	2	27	89.6	126.5	0.34	444.561	334.102	52.9026	18.7432
743	251122637	0	2014	2	27	84.92	97.75	0.54	596.537	101.143	92.217	17.5034
759	251122637	1	2014	2	26	92.46	127.25	0.16	360.868	306.555	80.4723	17.4073
759	251122637	0	2014	2	26	19.66	133	0.64	0	216.201	30.4166	5.46809
759	251122637	0	2014	2	26	93.24	70.75	3.34	1903.78	302.902	52.1453	4.38676
844	251122638	1	2014	2	1	97.92	24	0	596.537	0	35.881	416.968
844	251122638	0	2014	2	1	98.7	11	0.2	0	210.883	6.71036	387.017
844	251122638	0	2014	2	1	99.22	3.25	0.2	360.868	149.134	39.6227	396.951
847	251122638	1	2014	2	4	92.46	58.75	1	1268.68	151.89	23.7875	455.023
847	251122638	0	2014	2	4	95.58	31.75	1.4	945.475	0	37.5275	415.133
847	251122638	0	2014	2	4	91.42	36.25	1	0	287.141	65.7256	424.277
848	251122638	1	2014	2	6	95.32	118.25	1	0	190.707	32.6504	424.667
848	251122638	0	2014	2	6	92.72	32.75	0.4	0	114.181	73.4347	412.91
848	251122638	0	2014	2	6	88.04	37.5	0.8	811.953	55.2558	35.128	388.396
849	251122638	1	2014	2	7	98.18	47.75	1.6	0	405.043	8.11953	401.515
849	251122638	0	2014	2	7	98.18	0	1	0	55.2558	73.2748	418.497
849	251122638	0	2014	2	7	96.88	19	0.4	0	151.89	52.4002	419.433
850	251122638	1	2014	2	9	91.42	6.5	0.2	0	97.5156	74.9489	428.205
850	251122638	0	2014	2	9	97.4	3.75	0.4	0	0	106.137	385.496
850	251122638	0	2014	2	9	99.74	3.25	0	749.027	0	61.8082	437.701
851	251122638	1	2014	2	11	98.44	13.75	1.2	811.953	101.143	67.2348	397.794
851	251122638	0	2014	2	11	96.88	19	0.4	0	151.89	52.4002	415.903
851	251122638	0	2014	2	11	98.44	12.25	2.2	202.988	202.988	5.63857	359.033
852	251122638	1	2014	2	13	98.18	43.25	1.2	0	154.277	20.2348	452.944
852	251122638	0	2014	2	13	95.06	35.75	1.2	292.303	115.649	12.1742	435.925
852	251122638	0	2014	2	13	93.76	57	1	0	43.2401	70.4391	442.208
853	251122638	1	2014	2	15	97.92	22.75	1.2	241.573	179.454	79.8723	427.839
853	251122638	0	2014	2	15	97.66	36.5	0.6	0	73.0758	80.9526	461.768
853	251122638	0	2014	2	15	96.62	6	0.4	495.292	228.882	74.6157	441.988
854	251122638	1	2014	2	16	90.9	117.25	0.6	1169.21	90.2171	50.4668	452.003
854	251122638	0	2014	2	16	84.66	21.5	1.4	1826.9	147.912	104.952	479.898
854	251122638	0	2014	2	16	93.24	48.5	1	292.303	50.7471	47.6053	429.696
855	251122638	1	2014	2	17	92.72	50.75	1	799.526	151.89	44.0301	454.537
855	251122638	0	2014	2	17	93.24	50	1.4	0	507.271	38.0795	442.228
855	251122638	0	2014	2	17	90.38	17.5	0.4	0	246.036	72.2757	428.493
858	251122638	1	2014	2	20	95.58	30.5	1.2	202.988	363.266	57.4625	456.189
858	251122638	0	2014	2	20	93.76	44.5	0.6	817.592	295.234	67.7002	435.62
858	251122638	0	2014	2	20	96.1	22.5	1.6	659.712	541.294	33.475	497.045
859	251122638	1	2014	2	22	96.1	21.75	1.6	698.297	542.274	34.0566	492.188
859	251122638	0	2014	2	22	96.88	21.75	2	1053.53	285.361	91.3119	427.837
859	251122638	0	2014	2	22	96.36	7	2.2	698.297	60.3932	169.719	439.94
860	251122638	1	2014	2	24	94.28	62	2	360.868	228.216	71.1831	430.377
860	251122638	0	2014	2	24	92.46	10	0.4	0	345.166	0	459.028
860	251122638	0	2014	2	24	94.8	11.25	1.8	888.841	0	53.9943	399.501
825	251122647	1	2014	2	24	92.46	72.75	1.2	1826.9	264.436	115.225	3.77808
825	251122647	0	2014	2	24	95.06	11.5	2.8	0	157.421	103.089	51.4315
825	251122647	0	2014	2	24	95.06	14	1.2	0	181.46	80.439	49.5598
826	251122647	1	2014	2	2	95.32	20.75	1	405.977	43.2401	57.5262	216.689
826	251122647	0	2014	2	2	96.88	21.5	2.2	1981.17	0	81.5541	203.3
826	251122647	0	2014	2	2	91.16	76.75	1.8	0	212.283	102.923	198.725
827	251122647	1	2014	2	3	93.76	38	2	0	271.058	34.7566	226.858
827	251122647	0	2014	2	3	91.94	37.5	0.8	0	180.463	80.9528	213.734
827	251122647	0	2014	2	3	89.86	23.25	2	533.876	172.961	123.516	207.792
828	251122647	1	2014	2	4	93.5	34.5	1.2	0	90.8436	42.6502	215.896
828	251122647	0	2014	2	4	96.62	40	1.6	0	352.122	16.5705	205.479
828	251122647	0	2014	2	4	96.88	14.25	0.8	456.724	0	57.4847	175.592
829	251122647	1	2014	2	11	94.02	59.5	2.4	0	294.716	17.3887	106.36
829	251122647	0	2014	2	11	94.28	18.5	1.4	584.607	0	115.876	86.388
829	251122647	0	2014	2	11	94.02	4.75	2.6	241.573	345.921	95.9564	130.629
830	251122647	1	2014	2	14	91.68	59.75	1.4	721.736	140.964	23.354	99.9598
830	251122647	0	2014	2	14	95.84	39.75	1.2	811.953	86.4803	64.4105	48.4605
830	251122647	0	2014	2	14	95.06	35.5	1	1871.12	207.246	22.5543	127.771
831	251122647	1	2014	2	16	90.9	65	1	202.988	274.103	19.2178	207.924
831	251122647	0	2014	2	16	95.58	12	1.2	1256.25	40.0965	76.5822	210.194
831	251122647	0	2014	2	16	94.54	24.25	2.4	456.724	382.488	36.3251	174.705
832	251122647	1	2014	2	18	95.58	15	0	202.988	391.509	10.81	19.4292
832	251122647	0	2014	2	18	96.62	44	0.4	811.953	195.13	84.7169	14.3818
832	251122647	0	2014	2	18	96.36	47.75	2	495.292	180.463	18.2037	12.4592
833	251122647	1	2014	2	1	90.9	13.5	1.05	0	200.815	135.902	235.712
833	251122647	0	2014	2	1	94.28	3	1.65	0	149.134	151.365	206.709
833	251122647	0	2014	2	1	97.66	15.75	1.4	456.724	119.844	168.353	198.9
834	251122647	1	2014	2	6	97.4	51.25	0.35	292.303	943.37	87.1971	213.184
834	251122647	0	2014	2	6	97.14	3.25	0.7	360.868	90.0086	214.296	170.817
834	251122647	0	2014	2	6	96.62	38	0.3	241.573	60.3932	48.0097	206.671
835	251122647	1	2014	2	8	93.5	45.5	1.8	0	202.988	90.2631	22.997
835	251122647	0	2014	2	8	95.32	8.75	1.2	241.573	192.374	94.9863	63.4567
835	251122647	0	2014	2	8	82.84	51.75	0.4	0	217.519	22.5543	13.2857
838	251122647	1	2014	2	10	94.8	0	1.6	1116.44	250.277	30.4166	4.71231
838	251122647	0	2014	2	10	96.62	31.5	2	749.027	274.103	16.5705	41.3366
838	251122647	0	2014	2	10	95.06	28	1.8	811.953	245.898	76.3833	44.3491
839	251122647	1	2014	2	20	97.92	12	1.5	2273.47	90.2171	90.5595	107.16
839	251122647	0	2014	2	20	96.1	17.75	1.2	1169.21	101.143	199.443	97.5261
839	251122647	0	2014	2	20	97.4	8.5	1.7	805.43	180.66	46.8232	141.561
840	251122647	1	2014	2	22	98.96	60	0.5	405.977	210.061	96.577	1.31379
840	251122647	0	2014	2	22	95.84	25.75	0.94	1625.94	371.586	52.4598	33.2715
840	251122647	0	2014	2	22	95.32	21.75	0.36	292.303	368.863	50.7471	39.8736
575	251122648	1	2014	2	1	95.58	27.25	0.3	0	40.0965	141.563	243.229
575	251122648	0	2014	2	1	97.92	10.75	1	811.953	86.865	65.8555	244.052
575	251122648	0	2014	2	1	98.44	21.25	1.2	0	128.332	46.3386	283.307
576	251122648	1	2014	2	6	97.92	54.25	2.3	1014.94	223.851	118.285	272.682
576	251122648	0	2014	2	6	95.58	14.5	0.8	0	50.7471	88.7414	230.442
576	251122648	0	2014	2	6	93.24	23.5	1	456.724	174.574	49.8025	232.699
577	251122648	1	2014	2	8	95.58	66.25	1	1826.9	221.343	48.5706	219.521
577	251122648	0	2014	2	8	91.16	45	1.7	1059.16	172.961	132.897	269.334
577	251122648	0	2014	2	8	94.54	12.75	1.2	360.868	80.9704	115.091	278.856
578	251122648	1	2014	2	10	96.36	74	1.8	0	149.134	92.5164	236.013
578	251122648	0	2014	2	10	93.24	39.5	1.2	0	239.242	104.097	276.597
578	251122648	0	2014	2	10	95.58	60	1.2	596.537	383.843	39.1057	252.131
579	251122648	1	2014	2	11	96.1	46.75	2	456.724	219.729	79.7858	251.077
579	251122648	0	2014	2	11	93.76	31.75	1.4	698.297	66.2819	63.1501	270.738
579	251122648	0	2014	2	11	94.28	40.75	1.2	799.526	0	60.2331	307.626
580	251122648	1	2014	2	14	96.62	29	0.6	0	163.293	59.141	173.765
580	251122648	0	2014	2	14	92.72	30	1.6	1461.52	270.672	43.4119	142.07
580	251122648	0	2014	2	14	95.06	4.5	1.6	495.292	406.506	32.4781	219.655
581	251122648	1	2014	2	16	94.02	52.25	1.4	292.303	154.046	124.84	251.788
581	251122648	0	2014	2	16	92.2	17.25	1.2	1109.9	0	103.761	279.86
581	251122648	0	2014	2	16	95.32	67.75	2	360.868	111.14	111.428	312.449
582	251122648	1	2014	2	18	98.7	114.75	0.4	1769.36	207.246	15.3995	227.937
582	251122648	0	2014	2	18	96.88	28	3	0	209.528	56.7698	198.381
582	251122648	0	2014	2	18	91.16	36.25	1.8	563.857	133.457	34.0777	179.316
583	251122648	1	2014	2	20	97.92	119.75	0.8	0	337.512	68.801	166.426
583	251122648	0	2014	2	20	98.96	0.25	2.3	202.988	393.228	141.251	120.397
583	251122648	0	2014	2	20	97.92	3	2.6	1753.82	0	152.829	156.831
584	251122648	1	2014	2	22	97.66	74.25	0.8	0	141.364	31.2258	199.565
584	251122648	0	2014	2	22	92.72	35.5	1.4	0	101.143	93.2193	154.521
584	251122648	0	2014	2	22	96.88	34.5	1.6	202.988	101.143	95.8659	252.511
585	251122648	1	2014	2	27	94.54	101	1.2	405.977	172.961	31.6072	6.89258
585	251122648	0	2014	2	27	20.44	126.75	1	4823	0	0	0.931566
585	251122648	0	2014	2	27	8.22	124.75	1.2	1312.88	0	0	22.8735
586	251122648	1	2014	2	28	94.54	86	1.2	405.977	172.961	31.6072	3.22512
586	251122648	0	2014	2	28	4.58	118	1.4	1763.97	0	0	11.1133
586	251122648	0	2014	2	28	10.56	117	1	533.876	0	0	29.4574
587	251122648	1	2014	2	30	75.04	138.75	0.4	292.303	160.949	37.2836	7.86863
587	251122648	0	2014	2	30	18.1	110	0.8	1948.01	0	0	3.39785
587	251122648	0	2014	2	30	4.84	113.75	0.7	1109.9	172.961	0	55.0903
588	251122648	1	2014	2	31	80.5	34	1.2	202.988	156.75	114.337	6.3882
588	251122648	0	2014	2	31	88.04	31.25	1	0	363.645	113.88	42.2149
588	251122648	0	2014	2	31	83.1	90.5	0.8	856.16	138.592	37.2836	4.79908
589	251122648	1	2014	2	32	94.54	12.5	1.2	1249.71	202.508	30.4166	8.65769
589	251122648	0	2014	2	32	4.06	107.5	0.9	652.358	195.213	113.668	36.6268
589	251122648	0	2014	2	32	8.74	117.5	1.2	990.6	172.961	0	5.24656
590	251122648	1	2014	2	35	93.24	9.5	1.15	0	418.43	172.112	49.7202
590	251122648	0	2014	2	35	89.86	60	0.55	0	266.071	24.4705	4.33904
590	251122648	0	2014	2	35	96.1	18.75	0.8	659.712	60.3932	86.8477	94.7024
836	251122648	1	2014	2	2	95.32	27.75	2	1372.2	266.139	100.694	263.061
836	251122648	0	2014	2	2	98.7	51	0.9	596.537	0	75.5382	279.4
836	251122648	0	2014	2	2	98.44	7.5	2	241.573	517.108	91.2331	305.139
837	251122648	1	2014	2	3	95.06	16.25	1.44	584.607	180.66	41.9679	279.092
837	251122648	0	2014	2	3	96.1	43.75	0.74	0	278.488	97.8054	261.32
837	251122648	0	2014	2	3	87.78	9.75	2.04	1465.12	40.0965	74.453	296.887
1279	251122649	1	2015	2	7	98.44	17.75	2.6	0	0	163.452	97.3929
1279	251122649	0	2015	2	7	96.88	18.5	3.4	811.953	46.7685	58.8452	131.366
1279	251122649	0	2015	2	7	96.62	22.75	2	292.303	0	200.054	111.929
917	251122650	1	2015	2	1	96.36	97	2	0	239.242	126.601	155.2
917	251122650	0	2015	2	1	97.14	110.5	2.8	0	172.961	158.881	164.273
917	251122650	0	2015	2	1	97.92	100.25	2.2	0	0	101.947	121.484
1001	251122653	1	2015	2	1	94.54	55	1.8	202.988	50.7471	98.1101	381.487
1001	251122653	0	2015	2	1	88.56	112.5	2.2	0	0	100.365	343.313
1001	251122653	0	2015	2	1	96.88	64	2.6	0	114.181	164.962	369.852
1030	251122654	1	2015	2	5	94.28	36.25	2.44	1826.9	0	84.0525	202.29
1030	251122654	0	2015	2	5	86.74	25	2.2	1623.91	0	74.773	198.414
1030	251122654	0	2015	2	5	84.66	58	1.2	1625.94	90.2171	76.8549	179.258
1078	251122654	1	2015	2	1	95.58	59	3.12	1053.26	0	61.582	211.373
1078	251122654	0	2015	2	1	96.88	39.75	3.6	1865.21	101.143	150.185	120.366
1078	251122654	0	2015	2	1	94.54	29.75	3.18	2423.43	114.181	51.127	177.683
1080	251122654	1	2015	2	3	90.12	40.75	2.5	4846.87	0	57.5398	180.305
1080	251122654	0	2015	2	3	88.04	43	0.6	1826.9	452.007	154.19	176.357
1080	251122654	0	2015	2	3	85.96	47.5	0.74	1826.9	315.53	100.637	136.566
1048	251122655	1	2015	2	2	98.44	15.75	1.8	1769.36	239.351	149.34	123.917
1048	251122655	0	2015	2	2	85.18	23.5	2.5	1104.26	406.786	75.799	148.044
1048	251122655	0	2015	2	2	88.3	33	2.5	456.724	288.61	71.2894	161.091
1049	251122655	1	2015	2	3	95.58	23.5	2.5	1104.26	390.479	88.3628	145.946
1049	251122655	0	2015	2	3	91.94	19.75	2.7	0	66.2819	160.849	182.6
1049	251122655	0	2015	2	3	91.68	17	2	533.876	296.387	107.295	187.651
1050	251122655	1	2015	2	5	79.72	40.25	2.5	2437.89	80.9704	69.2098	92.6929
1050	251122655	0	2015	2	11	84.66	28	2.8	0	149.134	185.883	68.5194
1050	251122655	0	2015	2	11	90.38	94.25	2.3	2106.52	0	155.824	143.485
1053	251122655	1	2015	2	7	81.8	50	3.8	0	83.3366	68.7371	115.112
1053	251122655	0	2015	2	7	98.44	18	2.4	1410.79	376.128	189.842	165.606
1053	251122655	0	2015	2	7	92.98	19	3.4	1828.71	239.351	194.203	163.89
1055	251122655	1	2015	2	9	90.38	8.75	3.2	1826.9	184.604	56.4002	106.242
1055	251122655	0	2015	2	9	92.2	35.25	2.7	1408.49	129.913	111.697	132.501
1055	251122655	0	2015	2	9	93.24	52.75	2.4	1295.1	180.463	80.011	141.023
1057	251122655	1	2015	2	10	84.4	53	2.4	596.537	40.0965	124.542	99.2643
1057	251122655	0	2015	2	10	83.36	30.25	1	1274.32	359.743	132.319	91.0423
1057	251122655	0	2015	2	10	97.92	46	0.5	202.988	309.956	373.195	113.224
1059	251122655	1	2015	2	12	80.5	46	3	1560.98	0	14.6196	106.012
1059	251122655	0	2015	2	12	98.7	32.5	3.4	0	201.407	201.643	134.561
1059	251122655	0	2015	2	12	94.02	79.5	2.9	0	101.143	94.0438	149.115
1061	251122655	1	2015	2	14	85.7	26	1.7	202.988	733.082	184.431	146.105
1061	251122655	0	2015	2	14	96.36	3.5	1.9	0	272.122	83.8154	134.67
1061	251122655	0	2015	2	14	92.2	18.75	0.2	0	583.686	97.5452	96.9751
1062	251122655	1	2015	2	16	77.64	139.75	0.6	241.573	494.984	75.8347	40.9984
1062	251122655	0	2015	2	16	89.6	112	0	0	304.42	118.696	1.10899
1062	251122655	0	2015	2	16	90.38	40.5	1.3	0	136.986	135.449	31.2673
1064	251122655	1	2015	2	18	80.76	63.25	2.3	596.537	0	86.8792	105.167
1064	251122655	0	2015	2	18	84.4	8	2.3	1142.86	0	128.546	71.4698
1064	251122655	0	2015	2	18	79.2	17.25	2.6	811.953	279.047	70.9888	54.8414
1067	251122655	1	2015	2	20	91.68	32	2.2	957.405	423.238	44.0012	104.855
1067	251122655	0	2015	2	20	95.58	54	2.7	3529.98	172.961	75.8743	152.384
1067	251122655	0	2015	2	20	91.68	50	2.904	202.988	0	182.867	53.5499
1072	251122655	1	2015	2	22	85.44	73	2.1	1372.2	101.143	150.382	204.779
1072	251122655	0	2015	2	22	87.26	39	0.3	1169.21	315.747	76.5058	164.925
1072	251122655	0	2015	2	22	88.56	35.5	0.4	0	495.055	139.228	169.259
1073	251122655	1	2015	2	24	87	32.75	2.3	653.171	593.302	98.2685	8.79446
1073	251122655	0	2015	2	24	84.92	41.5	1.3	0	299.922	88.726	43.8571
1073	251122655	0	2015	2	24	85.44	64.75	2.6	990.583	1031.84	42.7066	36.8277
1074	251122655	1	2015	2	26	81.54	38.75	2.5	1136.32	406.476	32.4781	27.6383
1074	251122655	0	2015	2	26	91.42	26.5	1.6	360.868	297.171	221.136	34.5886
1074	251122655	0	2015	2	26	96.88	12.75	3.1	1372.2	489.93	88.1772	48.9978
1075	251122655	1	2015	2	28	87.78	66.5	2.6	360.868	101.143	179.262	129.168
1075	251122655	0	2015	2	28	92.2	20.25	3.1	3288.41	144.383	175.847	174.388
1075	251122655	0	2015	2	28	84.4	32.75	4.3	0	196.619	141.402	111.746
1076	251122655	1	2015	2	30	82.32	65.5	3.5	1765.75	210.665	128.247	123.472
1076	251122655	0	2015	2	30	92.98	51.5	3.1	811.953	0	120.486	170.253
1076	251122655	0	2015	2	30	94.8	12	3.3	456.724	0	153.315	171.592
1077	251122655	1	2015	2	32	97.66	68.25	2.5	5323.93	257.652	0	142.866
1077	251122655	0	2015	2	32	95.32	106.5	0.4	596.537	236.873	129.369	192.94
1077	251122655	0	2015	2	32	96.62	67	1.6	1169.21	214.04	204.14	185.644
1152	251122661	1	2015	2	4	98.18	47	1.1	0	50.7471	218.116	216.889
1152	251122661	0	2015	2	4	99.48	66	1.3	0	378.314	144.409	208.184
1152	251122661	0	2015	2	4	98.18	94	1.4	811.953	121.067	195.866	169.324
1153	251122661	1	2015	2	6	95.58	28.25	3	1826.9	197.286	148.141	173.137
1153	251122661	0	2015	2	6	88.82	58.25	0.8	0	109.522	73.877	145.102
1153	251122661	0	2015	2	6	92.46	104.75	1	0	97.5156	241.621	156.685
1154	251122661	1	2015	2	8	98.18	73.25	1.7	1918.24	141.364	231.753	112.657
1154	251122661	0	2015	2	8	97.14	42.25	0.8	969.833	277.978	77.373	89.3403
1154	251122661	0	2015	2	8	97.66	66	1.4	659.712	163.293	126.698	110.848
1155	251122661	1	2015	2	9	97.4	41.5	1	1053.26	369.147	185.35	152.865
1155	251122661	0	2015	2	9	97.92	65.5	1.6	456.724	80.9704	154.325	133.574
1155	251122661	0	2015	2	9	92.72	50.25	1.1	2222.74	244.487	95.7203	117.362
1156	251122661	1	2015	2	10	95.58	80.25	1.7	0	150.402	93.4962	215.433
1156	251122661	0	2015	2	10	94.54	68.75	1.1	0	50.7471	305.471	250.787
1156	251122661	0	2015	2	10	98.18	59.75	1.7	811.953	0	305.807	201.081
1157	251122661	1	2015	2	11	98.7	51.5	1.3	292.303	40.0965	144.455	199.934
1157	251122661	0	2015	2	11	98.96	57	2	2222.74	328.601	104.674	147.543
1157	251122661	0	2015	2	11	98.96	149.5	2.3	1765.75	529.521	75.1721	210.784
1158	251122661	1	2015	2	13	96.88	41	1.3	0	391.346	98.0334	224.76
1158	251122661	0	2015	2	13	97.92	36.5	2	2437.89	297.171	179.861	179.134
1158	251122661	0	2015	2	13	98.18	22.75	1	292.303	40.0965	185.134	203.694
1159	251122661	1	2015	2	14	97.92	32.75	1.7	1053.26	237.469	171.284	94.6332
1159	251122661	0	2015	2	14	97.92	36	1.6	602.441	253.735	31.3214	54.5733
1159	251122661	0	2015	2	14	90.9	69.25	0.8	0	55.2558	174.242	105.807
1160	251122661	1	2015	2	16	98.96	44	1.4	444.561	126.675	159.172	191.599
1160	251122661	0	2015	2	16	97.4	39.75	1.6	1169.21	159.941	159.08	221.255
1160	251122661	0	2015	2	16	95.32	76.25	1.5	811.953	244.487	135.018	212.918
1161	251122661	1	2015	2	17	96.88	68.5	1.1	2362.29	46.7685	285.92	250.294
1161	251122661	0	2015	2	17	98.7	43	0.9	0	150.61	175.593	220.418
1161	251122661	0	2015	2	17	98.7	24.25	1.9	1256.51	80.9704	199.924	252.828
1162	251122661	1	2015	2	19	92.46	47.5	2	241.573	362.157	153.825	101.688
1162	251122661	0	2015	2	19	93.5	43	1.7	360.868	215.416	59.2449	147.192
1162	251122661	0	2015	2	19	98.7	54.25	0.5	1041.1	359.146	99.3864	97.0514
1163	251122661	1	2015	2	20	93.5	62.75	2.1	1059.16	225.847	57.2145	164.179
1163	251122661	0	2015	2	20	97.14	91.25	1	4009.25	60.3932	152.049	178.136
1163	251122661	0	2015	2	20	85.7	60.25	0.2	2119.2	334.985	145.393	206.726
1164	251122661	1	2015	2	23	95.32	27.75	1	1712.72	297.492	167.872	195.799
1164	251122661	0	2015	2	23	93.24	43	0.6	292.303	509.152	66.2592	164.261
1164	251122661	0	2015	2	23	96.62	29	0.6	0	444.237	114.246	223.686
1166	251122661	1	2015	2	28	96.1	10	1	653.171	298.269	172.584	231.314
1166	251122661	0	2015	2	28	94.28	50.5	0.7	456.724	222.21	56.1938	198.223
1166	251122661	0	2015	2	28	95.32	61.5	0.4	1530.08	149.134	55.8934	186.724
1167	251122661	1	2015	2	30	94.28	43.5	0.8	888.841	319.143	70.6522	120.853
1167	251122661	0	2015	2	30	92.72	53.75	1.2	1471.67	80.9704	160.16	96.8062
1167	251122661	0	2015	2	30	88.56	36.5	0	241.573	93.9872	86.0041	94.3321
1168	251122661	1	2015	2	30	96.88	31.5	0.6	1169.21	322.095	125.061	49.5123
1168	251122661	0	2015	2	30	94.8	33.75	1	1130.41	90.0086	186.29	52.3024
1168	251122661	0	2015	2	30	93.24	43.5	1	360.868	305.524	137.265	63.1089
1169	251122661	1	2015	2	35	96.1	96.5	2.2	483.146	235.69	137.193	45.863
1169	251122661	0	2015	2	35	94.8	41.5	0.5	0	90.8436	92.7896	80.9445
1169	251122661	0	2015	2	35	98.7	114.5	2.3	0	66.2819	102.893	79.1206
1170	251122661	1	2015	2	43	90.64	48.75	0.1	241.573	303.412	0	123.66
1170	251122661	0	2015	2	43	95.32	31.75	0.3	0	66.2819	59.6498	133.663
1170	251122661	0	2015	2	43	94.28	42	1.3	360.868	260.132	53.4057	160.806
1190	251122662	1	2015	2	4	95.58	43	1.22	2187.76	0	121.686	206.376
1190	251122662	0	2015	2	4	90.9	49.75	0.8	0	246.228	92.8834	194.979
1190	251122662	0	2015	2	4	94.8	21	1.2	596.537	0	225.666	211.733
1191	251122662	1	2015	2	6	95.06	67.75	2.28	2999.72	0	154.262	145.076
1191	251122662	0	2015	2	6	94.28	34.25	2.2	1169.21	83.3366	157.215	171.414
1191	251122662	0	2015	2	6	96.1	17.5	2.32	360.868	182.113	121.459	128.081
1192	251122662	1	2015	2	8	95.58	38.5	1.88	292.303	0	79.6769	184.952
1192	251122662	0	2015	2	8	92.98	17	1.74	360.868	184.216	354.578	214.155
1192	251122662	0	2015	2	8	91.94	28.25	2.32	811.953	432.805	231.06	221.805
1194	251122662	1	2015	2	10	95.06	55.25	1	811.953	0	76.788	171.831
1194	251122662	0	2015	2	10	92.98	57.25	3.3	2996.11	149.134	127.221	182.265
1194	251122662	0	2015	2	10	89.6	24.25	3.4	888.841	0	221.596	201.614
1198	251122662	1	2015	2	14	95.58	39.5	1.3	1514.47	50.7471	165.222	103.453
1198	251122662	0	2015	2	14	89.6	69.75	0.6	1053.26	0	171.371	147.447
1198	251122662	0	2015	2	14	97.66	40.75	1.3	1414.13	0	254.951	152.318
1200	251122662	1	2015	2	17	87.26	51.25	0.7	241.573	715.873	96.6032	218.497
1200	251122662	0	2015	2	17	96.88	20	2.2	292.303	368.179	114.546	175.609
1200	251122662	0	2015	2	17	91.68	76.25	2.2	0	144.284	265.305	236.767
1201	251122662	1	2015	2	19	81.8	37.5	0.8	483.146	359.136	167.765	114.678
1201	251122662	0	2015	2	19	91.68	90.5	1.3	1794.65	40.0965	169.187	152.594
1201	251122662	0	2015	2	19	97.14	38	1.3	2074.11	335.261	227.425	84.1203
1202	251122662	1	2015	2	20	93.5	38.25	0.9	1408.49	190.707	181.882	165.118
1202	251122662	0	2015	2	20	94.8	23.25	1.1	1345.83	277.199	108.396	209.528
1202	251122662	0	2015	2	20	94.02	34.5	0.6	0	267.756	155.524	211.84
1203	251122662	1	2015	2	23	95.58	61.75	0.6	691.842	399.54	34.7566	207.783
1203	251122662	0	2015	2	23	92.72	69	0.9	1664.5	40.0965	207.557	168.071
1203	251122662	0	2015	2	23	94.54	37.5	0.8	1703.09	55.2558	206.749	194.714
1204	251122662	1	2015	2	28	97.66	114.75	0.4	1826.9	0	47.3384	37.6212
1204	251122662	0	2015	2	28	94.02	141.5	0.2	0	60.3932	119.838	20.4295
1204	251122662	0	2015	2	28	97.14	121.75	0.5	456.724	227.353	23.8615	33.1864
1205	251122662	1	2015	2	30	87.26	53	0.2	0	557.032	145.209	58.6353
1205	251122662	0	2015	2	30	92.2	43.25	0.4	0	311.155	89.567	45.803
1205	251122662	0	2015	2	30	90.38	59.25	0.8	444.561	402.535	94.0762	109.019
1206	251122662	1	2015	2	32	85.96	45.5	1.4	1771.65	361.385	28.5452	155.715
1206	251122662	0	2015	2	32	91.94	29.5	0.6	202.988	394.966	188.518	175.804
1206	251122662	0	2015	2	32	97.14	24	0.7	2577.7	212.688	293.378	140.804
998	251122663	1	2015	2	3	92.2	169	3.3	0	377.842	89.0517	255.805
998	251122663	0	2015	2	3	91.16	146	4.1	0	377.737	49.1472	254.41
998	251122663	0	2015	2	3	91.94	94.75	4.4	0	256.302	50.6592	276.422
999	251122663	1	2015	2	2	97.14	119	2.3	0	256.297	73.9915	236.536
999	251122663	0	2015	2	2	96.1	117.75	3	0	0	254.694	280.998
999	251122663	0	2015	2	2	96.1	84.5	2.7	0	369.772	123.589	263.766
1000	251122663	1	2015	2	1	96.62	32.25	2.5	0	114.181	146.714	204.145
1000	251122663	0	2015	2	1	98.18	57.5	1.5	0	0	124.061	164.608
1000	251122663	0	2015	2	1	96.36	67.25	3.4	0	0	161.898	156.932
1083	251122665	1	2015	2	10	98.18	141.5	0.4	596.537	490.13	46.6519	0.29054
1083	251122665	0	2015	2	10	92.46	48	1.2	241.573	46.7685	194.258	21.5116
1083	251122665	0	2015	2	10	95.06	81.25	1.4	444.561	195.903	207.426	15.4282
1092	251122665	1	2015	2	3	95.32	17.75	1.2	456.724	326.389	71.0457	46.3893
1092	251122665	0	2015	2	3	95.84	9.5	0.4	0	0	117.193	40.8309
1092	251122665	0	2015	2	3	97.4	12.5	0.7	0	293.205	118.57	91.9968
1093	251122665	1	2015	2	4	94.28	37.5	1.8	0	0	146.999	64.1546
1093	251122665	0	2015	2	4	95.58	65.25	1	811.953	90.2171	171.39	38.2462
1093	251122665	0	2015	2	4	97.66	82.25	0.6	811.953	440.259	62.2413	40.6781
1095	251122665	1	2015	2	6	97.66	134	2.3	444.561	396.668	91.4362	3.43293
1095	251122665	0	2015	2	6	97.14	113	0.2	0	617.864	73.7283	3.28042
1095	251122665	0	2015	2	6	94.54	43.5	0.8	0	506.4	61.0042	36.7466
1096	251122665	1	2015	2	8	96.1	82.25	1.6	0	455.715	132.239	12.4212
1096	251122665	0	2015	2	8	90.12	81.75	1.4	0	315.747	156.549	11.8092
1096	251122665	0	2015	2	8	91.42	117.25	0.4	0	133.469	89.0433	9.42207
1097	251122665	1	2015	2	12	98.7	176.25	0.4	0	86.865	166.077	4.63555
1097	251122665	0	2015	2	12	95.58	135	0.5	0	197.379	195.927	8.10137
1097	251122665	0	2015	2	12	40.46	154.5	1	0	163.293	32.7037	6.66153
1098	251122665	1	2015	2	14	84.66	46.25	2	0	407.907	164.531	7.15232
1098	251122665	0	2015	2	14	89.08	40.75	1.6	0	66.2819	46.9987	57.9969
1098	251122665	0	2015	2	14	91.42	51.75	2.1	456.724	293.404	120.121	57.5187
1099	251122665	1	2015	2	16	91.16	146	0.2	202.988	360.968	142.168	18.9157
1099	251122665	0	2015	2	16	4.32	53.75	0	0	0	16.5705	7.46347
1099	251122665	0	2015	2	16	31.1	154.75	0.8	0	0	82.6794	1.69343
1100	251122665	1	2015	2	18	26.42	121.25	0.8	292.303	385.503	0	5.61261
1100	251122665	0	2015	2	18	95.06	50.25	0.4	0	594.77	170.612	27.5676
1100	251122665	0	2015	2	18	97.4	45	0.7	0	640.715	92.865	36.6758
1101	251122665	1	2015	2	20	97.92	118.75	0.6	1725.4	311.204	46.9129	3.15381
1101	251122665	0	2015	2	20	98.44	156.25	0.4	1256.25	345.166	83.8511	2.63547
1101	251122665	0	2015	2	20	98.18	59	1.2	0	369.826	141.278	21.6598
1102	251122665	1	2015	2	22	95.06	11	2	241.573	693.092	39.838	28.6693
1102	251122665	0	2015	2	22	92.72	122.5	0.4	0	229.575	76.5822	2.73071
1102	251122665	0	2015	2	22	98.96	4.5	0.7	811.953	86.865	207.052	66.6146
1103	251122665	1	2015	2	24	96.1	132.25	0.5	1725.4	425.385	46.9129	5.07716
1103	251122665	0	2015	2	24	98.44	58	1	360.868	116.316	131.884	24.6524
1103	251122665	0	2015	2	24	98.18	133.75	0.2	292.303	254.937	116.357	12.5637
1104	251122665	1	2015	2	26	98.7	20.5	0.9	241.573	219.921	152.078	49.4174
1104	251122665	0	2015	2	26	98.7	117	0.4	0	262.969	210.663	9.03749
1104	251122665	0	2015	2	26	96.62	152	0.2	0	338.185	32.4781	0.429715
1105	251122665	1	2015	2	28	91.16	68.25	1.1	0	314.876	83.8849	47.1653
1105	251122665	0	2015	2	28	91.94	37	1	1268.68	97.5156	120.06	73.7145
1105	251122665	0	2015	2	28	98.7	117	0.4	0	262.969	210.663	9.03749
1108	251122666	1	2015	2	1	96.1	29.25	1.8	202.988	234.612	8.39711	413.652
1108	251122666	0	2015	2	1	87	47.25	0.7	0	168.428	79.2602	409.884
1108	251122666	0	2015	2	1	99.48	23.25	1.7	0	372.792	81.6342	386.403
1109	251122666	1	2015	2	2	97.92	22.75	1.5	1345.83	540.909	20.2426	409.332
1109	251122666	0	2015	2	2	90.38	5	1.1	292.303	0	89.3316	373.066
1109	251122666	0	2015	2	2	97.14	42.5	1.9	698.297	113.172	66.7844	393.756
1110	251122666	1	2015	2	4	96.36	62	0.5	957.405	339.732	0	413.028
1110	251122666	0	2015	2	4	96.62	14.25	0.9	596.537	46.7685	25.1296	377.87
1110	251122666	0	2015	2	4	97.66	27.75	0.8	1172.82	435.267	0	359.869
1111	251122666	1	2015	2	8	95.32	120.25	1.9	0	205.866	73.9618	415.538
1111	251122666	0	2015	2	8	95.84	70.5	1.6	0	263.37	123.195	408.968
1111	251122666	0	2015	2	8	94.8	42.5	1.9	360.868	161.536	27.983	366.505
1112	251122666	1	2015	2	14	97.14	35.25	2.1	456.724	216.201	9.66292	346.714
1112	251122666	0	2015	2	14	95.58	8.25	2.4	360.868	331.669	42.5328	398.352
1112	251122666	0	2015	2	14	91.16	40	2.4	0	154.277	112.646	381.758
1113	251122666	1	2015	2	16	96.62	85.5	0.7	1408.49	172.961	45.2765	404.035
1113	251122666	0	2015	2	16	93.76	30.25	1.3	602.441	266.071	74.562	413.139
1113	251122666	0	2015	2	16	98.44	48	1.7	0	301.53	84.5431	360.247
1115	251122666	1	2015	2	18	98.44	67.5	1.5	888.841	149.134	94.087	430.155
1115	251122666	0	2015	2	18	97.92	27.5	2.1	0	0	115.137	404.312
1115	251122666	0	2015	2	18	94.54	47.5	1.2	698.297	302.39	50.883	383.341
1116	251122666	1	2015	2	20	90.38	145	2.26	1826.9	0	39.6354	314.74
1116	251122666	0	2015	2	20	87.78	48.75	1.94	1053.53	302.776	62.9799	294.705
1116	251122666	0	2015	2	20	88.04	10	2.9	6292.64	385.451	32.4781	344.624
1117	251122666	1	2015	2	22	96.88	54.75	0.5	360.868	40.0965	109.422	425.958
1117	251122666	0	2015	2	22	97.4	63.5	1	241.573	0	81.6439	409.337
1117	251122666	0	2015	2	22	93.5	32.25	1.3	0	381.472	40.6554	421.402
1118	251122666	1	2015	2	24	90.12	46.25	2.7	939.87	196.194	86.0864	221.786
1118	251122666	0	2015	2	24	88.82	20.5	3.2	0	339.44	103.539	262.26
1118	251122666	0	2015	2	24	87.52	15.25	2.82	0	233.354	108.591	235.444
1196	251122666	1	2015	2	6	92.72	29.25	0.9	533.876	287.141	45.3566	396.923
1196	251122666	0	2015	2	6	86.48	77.75	2.1	1268.68	195.903	54.9547	384.446
1196	251122666	0	2015	2	6	89.34	56.25	3.6	1384.13	202.988	112.224	369.849
1199	251122666	1	2015	2	10	90.38	46.75	3	360.868	180.66	76.6236	310.151
1199	251122666	0	2015	2	10	94.8	19.5	3.9	292.303	405.274	24.0198	341.312
1199	251122666	0	2015	2	10	93.5	26.5	1.6	856.16	363.619	80.326	309.847
991	251122670	1	2015	2	1	92.46	75.25	0.5	0	156.399	92.2401	302.569
991	251122670	0	2015	2	1	94.28	26.75	1.8	241.573	0	110.887	319.059
991	251122670	0	2015	2	1	93.24	72	0.8	0	261.433	65.7162	272.039
992	251122670	1	2015	2	2	93.5	50.25	1.2	799.526	426.499	153.067	295.48
992	251122670	0	2015	2	2	92.72	59	1.2	563.857	144.383	128.252	276.686
992	251122670	0	2015	2	2	91.42	41.25	3.5	3482.58	66.2819	67.4166	314.997
1207	251122672	1	2015	2	1	88.56	30.5	2.24	1521.26	0	119.178	169.076
1207	251122672	0	2015	2	1	94.8	28	0.6	495.292	0	198.432	215.382
1207	251122672	0	2015	2	1	91.42	43.5	1.9	360.868	0	100.939	91.9598
1209	251122672	1	2015	2	3	92.46	23.75	1.6	1169.21	46.7685	211.414	77.2957
1209	251122672	0	2015	2	3	88.56	70.25	2.8	405.977	40.0965	59.2539	132.203
1209	251122672	0	2015	2	3	89.6	43.75	1.3	0	0	115.437	79.1935
1211	251122672	1	2015	2	5	96.88	30.75	0.9	0	80.9704	62.3071	87.575
1211	251122672	0	2015	2	5	91.42	34.75	1.6	0	80.9704	137.153	62.3252
1211	251122672	0	2015	2	5	95.06	87	2.3	483.146	172.961	172.206	119.601
1212	251122672	1	2015	2	7	88.04	78	1.1	653.171	171.187	147.985	95.7598
1212	251122672	0	2015	2	7	76.6	30.25	3.2	4313.5	86.865	182.144	71.8596
1212	251122672	0	2015	2	7	77.38	20.75	9	0	50.7471	172.245	151.82
1213	251122672	1	2015	2	9	87.52	85	0.7	360.868	402.303	93.4666	9.01008
1213	251122672	0	2015	2	9	91.94	23.5	0.4	404.572	331.006	124.739	48.6235
1213	251122672	0	2015	2	9	89.86	35	0.9	519.65	170.009	250.658	53.4626
1214	251122672	1	2015	2	12	92.2	39.5	1.1	787.595	199.751	195.529	95.4697
1214	251122672	0	2015	2	12	90.64	42	1.2	1408.49	191.333	168.98	138.066
1214	251122672	0	2015	2	12	90.64	49.25	1.3	563.857	190.306	193.307	143.068
1215	251122672	1	2015	2	14	88.3	33.75	2.5	202.988	363.266	153.042	144.15
1215	251122672	0	2015	2	14	87	51	2.1	596.537	0	197.641	180.393
1215	251122672	0	2015	2	14	86.74	39	2.4	1408.49	46.7685	91.5283	104.105
1217	251122672	1	2015	2	18	95.58	29.25	0.9	963.309	133.457	323.283	88.0634
1217	251122672	0	2015	2	18	87.52	54.25	1.1	241.573	515.943	134.736	53.5849
1217	251122672	0	2015	2	18	94.28	33.5	0.8	1668.11	204.398	167.596	107.08
1218	251122672	1	2015	2	19	95.06	42.75	1.2	977.053	230.497	143.027	110.145
1218	251122672	0	2015	2	19	94.8	34.25	0.7	1375.81	103.633	175.36	153.565
1218	251122672	0	2015	2	19	93.24	27.25	0.8	202.988	279.047	110.895	133.082
1219	251122672	1	2015	2	21	96.36	18.5	0.8	1268.68	293.71	48.9651	133.423
1219	251122672	0	2015	2	21	95.32	26.75	1	456.724	0	297.121	91.6102
1219	251122672	0	2015	2	21	95.06	33	0.8	2119.2	0	246.302	139.51
1220	251122672	1	2015	2	25	94.28	187	0.2	749.027	420.944	60.8505	0.719376
1220	251122672	0	2015	2	25	94.54	41.75	0.2	292.303	391.655	99.7957	17.7038
1220	251122672	0	2015	2	25	96.36	137.75	0.1	659.712	60.3932	137.961	1.00914
1221	251122672	1	2015	2	27	94.54	20.5	2.8	533.876	654.996	32.4781	15.5587
1221	251122672	0	2015	2	27	93.5	22.75	3.5	1181.14	533.178	0	3.04587
1221	251122672	0	2015	2	27	91.68	89	2.4	1205.75	518.197	0	6.66573
1222	251122672	1	2015	2	30	95.58	120.25	2.8	241.573	792.393	23.8615	9.85198
1222	251122672	0	2015	2	30	93.24	22.25	3.8	1777.98	432.786	0	31.4554
1222	251122672	0	2015	2	30	90.9	79	4	292.303	483.044	74.4439	10.2115
1223	251122672	1	2015	2	32	98.96	174	2	1422.72	459.372	32.4781	17.6249
1223	251122672	0	2015	2	32	96.62	141.5	2.4	0	377.359	76.2183	3.14846
1223	251122672	0	2015	2	32	97.92	160.5	2.4	456.724	426.499	0	12.0777
1224	251122672	1	2015	2	34	96.88	151.25	2.2	698.297	432.786	0	15.8682
1224	251122672	0	2015	2	34	92.46	46	2.6	292.303	709.54	23.8615	14.5776
1224	251122672	0	2015	2	34	98.7	106.75	1.8	241.573	567.588	23.8615	2.44284
1225	251122672	1	2015	2	36	75.04	107.5	0.7	241.573	430.602	20.2426	23.928
1225	251122672	0	2015	2	36	92.46	115	3.1	1067.75	449.348	30.4166	6.31735
1225	251122672	0	2015	2	36	94.54	107.25	2.2	0	268.594	84.2463	6.36716
936	251122673	1	2015	2	1	90.38	48.25	1.44	811.953	0	122.1	174.419
936	251122673	0	2015	2	1	87	24	1.6	202.988	55.2558	303.436	145.25
936	251122673	0	2015	2	1	82.32	40.5	2.2	444.561	0	101.503	178.379
938	251122673	1	2015	2	3	85.96	19.5	1.84	456.724	0	221.178	182.191
938	251122673	0	2015	2	3	84.66	45.25	1.58	1312.88	0	44.2305	163.701
938	251122673	0	2015	2	3	89.86	16.25	2.68	1193.07	235.493	176.442	146.649
940	251122673	1	2015	2	5	91.42	28.5	1.52	2150.48	0	54.7752	182.646
940	251122673	0	2015	2	5	85.96	37.25	1.88	811.953	0	304.218	177.838
940	251122673	0	2015	2	5	89.08	22.5	1.5	2999.72	251.753	94.501	142.96
941	251122673	1	2015	2	7	86.74	94	1.3	2583.61	80.9704	302.891	197.771
941	251122673	0	2015	2	7	84.14	20	1.44	360.868	209.302	140.208	167.765
941	251122673	0	2015	2	7	88.3	73	1.86	1530.08	90.2171	114.878	156.473
945	251122673	1	2015	2	9	83.1	26.5	1.56	2665.01	241.053	144.399	186.754
945	251122673	0	2015	2	9	84.14	16.75	1.66	0	294.841	221.388	161.609
945	251122673	0	2015	2	9	78.68	54.75	1.94	0	90.2171	113.443	151.595
948	251122673	1	2015	2	11	96.88	82	7	360.868	114.181	88.6969	107.872
948	251122673	0	2015	2	11	95.84	51	1.78	292.303	66.2819	120.174	140.973
948	251122673	0	2015	2	11	96.62	26	2.04	0	409.277	112.532	145.168
949	251122673	1	2015	2	12	84.92	20	2.2	596.537	50.7471	144.605	181.322
949	251122673	0	2015	2	12	75.82	82.25	1.74	0	0	76.1494	151.595
949	251122673	0	2015	2	12	84.92	59.25	1.66	0	190.498	127.363	139.181
950	251122673	1	2015	2	14	94.8	60.75	2.4	0	66.2819	117.982	84.7229
950	251122673	0	2015	2	14	95.84	39.75	3	602.441	136.986	135.104	34.303
950	251122673	0	2015	2	14	96.1	30.75	3.8	0	156.499	130.173	38.2259
1020	251122673	1	2015	2	16	89.08	34.5	1.6	811.953	115.649	191.414	126.599
1020	251122673	0	2015	2	16	85.44	67.25	1.5	202.988	164.928	171.717	103.783
1020	251122673	0	2015	2	16	89.08	34.75	1.2	1826.9	309.187	152.224	128.578
1021	251122673	1	2015	2	17	97.66	67.5	1.7	0	360.7	37.2836	121.833
1021	251122673	0	2015	2	17	92.98	29.5	1.6	1408.49	360.968	37.2836	75.6015
1021	251122673	0	2015	2	17	97.4	12	1.1	596.537	149.134	91.5992	98.5762
1022	251122673	1	2015	2	19	96.36	24.75	3.2	1169.21	149.134	46.5724	115.76
1022	251122673	0	2015	2	19	95.06	42.5	1.3	0	149.134	87.3417	157.267
1022	251122673	0	2015	2	19	92.46	48	2.2	0	169.437	64.8294	87.5656
1023	251122673	1	2015	2	21	97.92	63.75	1.3	0	130.314	105.223	112.824
1023	251122673	0	2015	2	21	93.5	31.25	2.3	1181.14	0	58.1542	75.2357
1023	251122673	0	2015	2	21	95.84	28	0.5	0	428.098	67.2348	115.5
1044	251122673	1	2015	2	23	98.7	45.25	1.4	0	46.7685	125.07	153.593
1044	251122673	0	2015	2	23	95.58	31.25	2.2	0	416.725	109.78	111.033
1044	251122673	0	2015	2	23	92.72	24.25	3	0	0	101.847	115.355
1046	251122673	1	2015	2	30	98.96	119.25	3.4	1587.14	448.346	38.704	4.85655
1046	251122673	0	2015	2	30	96.36	71.25	2.9	292.303	537.874	55.7962	19.912
1046	251122673	0	2015	2	30	92.46	61.25	2.1	596.537	357.115	45.6492	13.2766
212	266079501	1	2013	1	1	98.44	11.25	2.25	0	0	209.089	125.238
212	266079501	0	2013	1	1	92	5.75	2.6	1268.68	0	160.074	67.2625
212	266079501	0	2013	1	1	98.18	8	2.3	888.841	0	112.095	155.853
213	266079501	1	2013	1	2	97.66	3	2.7	0	172.961	94.0318	70.1857
213	266079501	0	2013	1	2	97.66	12.25	2.7	0	0	277.043	131.418
213	266079501	0	2013	1	2	94.28	7.75	0.65	0	119.844	160.799	146.189
214	266079501	1	2013	1	3	99.48	0	1.65	0	0	154.083	68.9848
214	266079501	0	2013	1	3	95.32	12.25	2.1	1169.21	40.0965	130.086	113.369
214	266079501	0	2013	1	3	94.54	7.25	2	0	46.7685	183.278	20.9008
215	266079501	1	2013	1	4	99.74	8.75	2.55	1753.82	0	152.581	77.8289
215	266079501	0	2013	1	4	95.32	12	3.9	2338.43	0	175.675	21.343
215	266079501	0	2013	1	4	98.18	3.5	2.7	292.303	0	216.748	90.8143
216	266079501	1	2013	1	5	97.92	2.5	2.1	838.11	0	122.283	78.5085
216	266079501	0	2013	1	5	97.4	6.75	1.5	495.292	202.988	109.253	57.5506
216	266079501	0	2013	1	5	96.36	1.25	1.7	0	0	160.552	51.0178
217	266079501	1	2013	1	6	98.18	3	1.9	0	274.103	55.3702	70.6279
217	266079501	0	2013	1	6	96.62	9	1.35	596.537	46.7685	131.515	70.8847
217	266079501	0	2013	1	6	94.02	21.5	2.1	596.537	247.295	91.2766	101.198
218	266079501	1	2013	1	7	95.58	6.25	1.49	1650.06	129.913	26.1269	56.8205
218	266079501	0	2013	1	7	98.18	10.5	2.9	1345.83	0	154.471	6.26151
218	266079501	0	2013	1	7	95.84	7.5	2.6	602.441	0	62.4299	77.1631
220	266079501	1	2013	1	9	95.32	6	2.7	0	80.9704	202.442	98.2076
220	266079501	0	2013	1	9	98.96	11.25	1.2	3452.83	602.925	171.057	165.171
220	266079501	0	2013	1	9	95.06	10.75	1	1625.94	0	183.733	78.7893
222	266079501	1	2013	1	11	92.2	7.5	2.4	584.607	239.242	134.636	129.306
222	266079501	0	2013	1	11	98.96	2.75	1.7	659.712	0	135.981	76.1858
222	266079501	0	2013	1	11	97.92	8.25	2.5	0	129.913	144.22	121.092
224	266079501	1	2013	1	13	99.22	3	1.2	1053.26	0	215.946	113.782
224	266079501	0	2013	1	13	98.96	13.25	0.3	1193.07	0	110.826	87.1397
224	266079501	0	2013	1	13	97.66	16	1.2	292.303	0	143.334	106.986
226	266079501	1	2013	1	15	99.22	0	2.9	2931.15	0	86.1455	104.616
226	266079501	0	2013	1	15	99.74	5.75	1	811.953	470.428	133.709	87.6164
226	266079501	0	2013	1	15	98.7	20	1.2	0	101.494	124.865	149.946
228	266079501	1	2013	1	17	98.44	19.75	0.9	0	0	136.45	81.5822
228	266079501	0	2013	1	17	97.66	11.75	1.1	1408.49	90.2171	240.893	124.637
228	266079501	0	2013	1	17	97.92	11.25	1.2	292.303	0	183.382	65.9629
230	266079501	1	2013	1	19	98.18	27.5	2.2	1169.21	208.168	140.366	99.5344
230	266079501	0	2013	1	19	99.22	16.25	0.7	1053.26	0	169.914	62.5091
230	266079501	0	2013	1	19	98.44	46.75	0.9	2996.11	102.024	191.966	116.542
231	266079501	1	2013	1	21	99.74	57	0.8	1826.9	86.4803	219.127	116.542
231	266079501	0	2013	1	21	98.96	11.75	1	1169.21	50.7471	90.7151	152.319
231	266079501	0	2013	1	21	100	31.75	1.6	360.868	177.422	62.5744	79.915
232	266079501	1	2013	1	23	99.74	17	0.8	1625.94	0	111.005	113.31
232	266079501	0	2013	1	23	99.74	9.25	1.2	3176.54	0	90.9043	76.0042
232	266079501	0	2013	1	23	100	9.5	1	1268.68	113.172	146.779	62.4745
234	266079501	1	2013	1	25	98.44	0	1.2	5064.58	114.181	90.6209	66.6194
234	266079501	0	2013	1	25	98.7	22.5	0.7	1169.21	90.8436	73.1697	29.4164
234	266079501	0	2013	1	25	99.22	12	0.4	602.441	431.205	6.51154	45.6489
372	266079504	1	2013	1	2	100	1.75	4	698.297	0	102.52	308.77
372	266079504	0	2013	1	2	100	20.75	3.04	1169.21	371.344	345.312	296.793
372	266079504	0	2013	1	2	97.14	35	4.26	202.988	253.51	435.367	287.381
373	266079504	1	2013	1	4	100	34.75	7.42	799.526	0	196.94	310.544
373	266079504	0	2013	1	4	99.74	19.25	4.02	292.303	40.0965	183.188	282.591
373	266079504	0	2013	1	4	96.62	16	3.64	0	0	277.596	261.354
375	266079504	1	2013	1	6	99.74	26.5	5.54	1169.21	0	274.134	302.758
375	266079504	0	2013	1	6	99.74	48	5.34	241.573	0	88.2957	309.752
375	266079504	0	2013	1	6	96.36	12	2.7	0	73.0758	278.322	266.083
377	266079504	1	2013	1	8	100	25.25	4.5	799.526	0	254.307	304.132
377	266079504	0	2013	1	8	98.44	6.25	3.48	0	139.358	160.625	255.983
377	266079504	0	2013	1	8	99.22	32.25	4.44	0	285.359	178.786	311.908
379	266079504	1	2013	1	10	96.62	15	4.66	0	114.181	150.69	303.608
379	266079504	0	2013	1	10	100	19.75	3.1	360.868	0	268.429	302.932
379	266079504	0	2013	1	10	100	15.75	3.54	0	0	114.205	290.099
380	266079504	1	2013	1	12	99.22	44	7.02	0	114.181	143.996	288.077
380	266079504	0	2013	1	12	98.44	12.75	2.02	0	246.036	197.315	247.894
380	266079504	0	2013	1	12	98.96	6.25	6.34	799.526	0	124.505	270.488
382	266079504	1	2013	1	14	100	7.25	4.26	799.526	345.921	83.0076	312.236
382	266079504	0	2013	1	14	96.36	26.75	2.62	0	0	325.557	265.453
382	266079504	0	2013	1	14	91.42	83.75	3.66	0	0	280.518	306.658
384	266079504	1	2013	1	15	100	15.75	4.52	596.537	0	119.419	294.837
384	266079504	0	2013	1	15	98.7	8.5	2.5	1169.21	0	163.511	297.694
384	266079504	0	2013	1	15	94.54	23.75	2.46	2740.34	214.193	179.418	235.972
386	266079504	1	2013	1	17	98.7	30.5	4.02	202.988	239.435	181.99	328.167
386	266079504	0	2013	1	17	96.36	32.75	2.86	0	86.865	166.104	299.113
386	266079504	0	2013	1	17	100	16.25	2.42	0	220.949	316.328	305.558
387	266079504	1	2013	1	19	99.48	1.25	4.46	0	114.181	143.996	296.088
387	266079504	0	2013	1	19	98.96	5	4.12	957.405	0	108.696	272.779
387	266079504	0	2013	1	19	100	19.25	3.48	292.303	90.2171	186.992	250.564
388	266079504	1	2013	1	20	97.14	2.75	1.7	811.953	412.103	109.432	278.897
388	266079504	0	2013	1	20	97.14	4	0.3	456.724	0	181.23	241.724
388	266079504	0	2013	1	20	99.22	2.25	2.4	913.448	215.324	112.549	324.715
389	266079504	1	2013	1	22	98.18	2.75	1.2	1014.94	0	89.8854	288.36
389	266079504	0	2013	1	22	98.96	1.25	1.4	957.405	101.143	43.3657	287.222
389	266079504	0	2013	1	22	97.4	4.75	3.4	2068.47	172.961	84.0067	252.932
392	266079504	1	2013	1	24	99.74	6	4	3288.41	263.315	60.2719	302.058
392	266079504	0	2013	1	24	99.48	1.5	1.5	0	638.692	34.9951	277.665
392	266079504	0	2013	1	24	99.22	5.5	0.7	4165.32	90.2171	131.962	252.869
393	266079504	1	2013	1	34	94.28	39.25	0.1	0	870.983	84.6053	28.3612
393	266079504	0	2013	1	34	97.14	90.25	0.4	0	1069.33	71.5845	5.18693
393	266079504	0	2013	1	34	36.04	68.75	2.1	0	0	72.0402	2.06377
106	266079506	1	2013	1	1	97.92	5.75	2.48	456.724	0	196.366	41.9384
106	266079506	0	2013	1	1	100	102.25	5.36	5214.77	205.658	242.053	5.05817
106	266079506	0	2013	1	1	98.44	113.25	3.48	952.015	322.095	8.11953	72.4555
108	266079506	1	2013	1	3	97.66	21	1.66	811.953	555.936	305.428	47.546
108	266079506	0	2013	1	3	98.96	11	2.32	0	480.482	195.169	97.973
108	266079506	0	2013	1	3	99.48	47.75	3.24	292.303	325.465	186.769	41.8086
110	266079506	1	2013	1	5	97.4	42.5	3.66	6572.31	0	8.11953	52.6756
110	266079506	0	2013	1	5	90.12	86.5	3.34	0	492.795	73.2572	3.42296
110	266079506	0	2013	1	5	99.22	7.5	4.56	241.573	388.377	122.969	97.6755
112	266079506	1	2013	1	7	93.5	22	4.26	292.303	332.137	146.827	26.7915
112	266079506	0	2013	1	7	98.96	21.25	3.04	1169.21	323.763	229.607	65.6642
112	266079506	0	2013	1	7	98.7	0	2.92	0	561.346	124.395	40.9946
114	266079506	1	2013	1	9	94.8	166.75	3.52	777.146	189.406	115.052	7.95363
114	266079506	0	2013	1	9	98.96	29.5	2.66	0	373.326	140.518	13.1115
114	266079506	0	2013	1	9	97.4	85	4.32	0	43.2401	155.803	2.45792
118	266079506	1	2013	1	13	99.48	69	2.68	1826.9	516.491	170.33	1.67246
118	266079506	0	2013	1	13	96.36	70.25	0	596.537	215.675	75.6577	26.3757
118	266079506	0	2013	1	13	61.52	98.5	1.1	0	0	53.8297	9.26724
120	266079506	1	2013	1	15	93.24	105.25	2.66	0	66.2819	131.451	27.9423
120	266079506	0	2013	1	15	100	51	3.8	456.724	43.2401	286.943	63.5397
120	266079506	0	2013	1	15	100	55	3.26	0	291.641	88.8318	22.8972
121	266079506	1	2013	1	17	98.96	130.75	3	1193.07	855.273	179.701	2.49159
121	266079506	0	2013	1	17	94.28	62.75	2.9	292.303	421.186	34.2665	12.4062
121	266079506	0	2013	1	17	94.8	37.25	3.48	0	345.258	87.2373	3.37107
122	266079506	1	2013	1	19	98.7	86	3.38	1169.21	43.2401	256.299	22.5432
122	266079506	0	2013	1	19	68.8	124.5	2.72	0	143.73	53.534	5.11636
122	266079506	0	2013	1	19	33.7	144.5	0	0	0	90.5629	9.56518
123	266079506	1	2013	1	33	90.38	41.5	3.8	0	43.2401	107.023	20.0339
123	266079506	0	2013	1	33	94.8	13.75	2	0	0	213.654	44.5455
123	266079506	0	2013	1	33	95.84	42.25	3	0	170.591	108.041	46.8852
134	266079508	1	2013	1	2	98.96	7	0.7	749.027	304.678	198.485	49.7574
134	266079508	0	2013	1	2	91.16	16.75	2.1	1826.9	149.134	107.05	100.426
134	266079508	0	2013	1	2	95.32	30.75	0.6	0	592.566	77.4184	58.941
136	266079508	1	2013	1	4	95.32	32.75	3.2	456.724	0	260.208	145.028
136	266079508	0	2013	1	4	91.16	16.25	1.3	0	40.0965	154.93	145.677
136	266079508	0	2013	1	4	93.5	5.25	2.6	0	209.528	189.131	115.542
138	266079508	1	2013	1	6	95.84	16.25	1	202.988	0	215.445	94.5695
138	266079508	0	2013	1	6	92.98	20	0.9	596.537	43.2401	176.819	133.581
138	266079508	0	2013	1	6	96.1	14.25	2.7	0	182.113	142.084	136.139
140	266079508	1	2013	1	8	93.76	15.5	3	241.573	0	229.363	54.6069
140	266079508	0	2013	1	8	95.06	14	0.8	0	163.293	167.739	12.6772
140	266079508	0	2013	1	8	96.1	1.75	1.05	360.868	149.134	163.327	74.5324
175	266079508	1	2013	1	10	94.28	13.25	1.2	1014.94	346.514	105.349	33.4875
175	266079508	0	2013	1	10	95.58	28	1.4	0	147.912	193.567	19.385
175	266079508	0	2013	1	10	94.8	14.75	3.5	736.865	589.185	14.4347	3.98922
177	266079508	1	2013	1	12	91.16	10.5	2.7	850.538	202.637	70.671	23.3682
177	266079508	0	2013	1	12	99.22	22.25	0.8	292.303	289.276	162.427	22.0162
177	266079508	0	2013	1	12	94.28	8.25	0	0	103.633	28.5452	8.68449
178	266079508	1	2013	1	14	99.22	23.5	0.8	1169.21	464.814	198.003	88.1886
178	266079508	0	2013	1	14	95.32	27	1.8	292.303	60.3932	190.866	99.231
178	266079508	0	2013	1	14	97.4	31.25	2.1	456.724	302.873	170.387	85.5544
179	266079508	1	2013	1	16	81.02	8.75	0	0	567.522	28.5452	7.01621
179	266079508	0	2013	1	16	96.62	20	0.9	2577.7	181.18	72.4211	231.407
179	266079508	0	2013	1	16	95.06	31.75	1.4	0	174.507	119.463	18.4905
180	266079508	1	2013	1	17	91.94	6.5	1.7	563.857	423.297	41.9287	21.649
180	266079508	0	2013	1	17	95.06	23.5	0.7	360.868	95.3523	168.978	15.0162
180	266079508	0	2013	1	17	97.92	17	0.5	360.868	127.739	33.475	11.0162
181	266079508	1	2013	1	19	95.58	14	2.6	901.285	172.961	39.7307	68.6696
181	266079508	0	2013	1	19	87.26	9.25	0.9	241.573	150.61	127.845	21.0136
181	266079508	0	2013	1	19	90.64	39	2.35	2029.88	202.286	236.109	94.115
182	266079508	1	2013	1	20	93.76	21.25	1.3	0	322.795	173.971	74.8264
182	266079508	0	2013	1	20	97.92	3.5	2	3808.06	102.024	142.427	79.9694
182	266079508	0	2013	1	20	99.74	14.75	1	2220.44	46.7685	152.001	105.032
184	266079508	1	2013	1	22	95.58	4.25	2.7	444.561	260.808	51.3414	2.00109
184	266079508	0	2013	1	22	96.1	36.25	2.5	1155.02	210.883	150.156	2.81485
184	266079508	0	2013	1	22	98.7	5.75	1	495.292	222.21	99.1596	2.15615
186	266079508	1	2013	1	31	95.06	9	0.9	444.561	384.849	36.0357	46.5694
186	266079508	0	2013	1	31	99.48	20.5	0	202.988	610.786	98.6482	91.1659
186	266079508	0	2013	1	31	98.7	15.25	0	686.134	1063.89	0	83.1271
187	266079508	1	2013	1	32	99.48	49.5	0.3	775.449	984.302	0	30.265
187	266079508	0	2013	1	32	99.22	38	0.1	202.988	602.8	65.8288	19.7497
187	266079508	0	2013	1	32	98.7	42.5	0	3109.57	590.255	49.3957	48.5435
188	266079508	1	2013	1	34	82.84	40.5	0.7	0	60.3932	108.572	1.31856
188	266079508	0	2013	1	34	50.86	164.25	1.3	0	0	67.7192	21.9172
188	266079508	0	2013	1	34	58.4	93.75	1.15	0	66.2819	54.876	0.757333
190	266079508	1	2013	1	38	92.72	11.5	0.8	241.573	531.542	0	47.4867
190	266079508	0	2013	1	38	100	16.25	0	533.876	495.398	35.7545	3.34503
190	266079508	0	2013	1	38	91.42	91.5	0	1169.21	312.086	0	33.3249
191	266079508	1	2013	1	40	92.98	46.75	0.3	0	669.954	0	20.6265
191	266079508	0	2013	1	40	96.88	22.5	0.2	456.724	742.76	57.0905	55.4745
191	266079508	0	2013	1	40	2.76	118.5	1.3	0	73.0758	0	10.3315
51	266079510	1	2013	1	13	99.74	0	1.2	1629.55	0	92.6027	309.946
51	266079510	0	2013	1	13	98.44	0	1.6	456.724	0	181.407	300.258
51	266079510	0	2013	1	13	99.22	0	0.9	1104.26	149.134	143.435	328.81
52	266079510	1	2013	1	1	95.58	12	3.8	0	40.0965	179.9	368.709
52	266079510	0	2013	1	1	97.4	6.25	4	838.11	0	54.2682	351.807
52	266079510	0	2013	1	1	97.4	0	3	0	0	181.307	304.525
53	266079510	1	2013	1	3	99.74	1.25	2.38	1625.94	0	208.977	389.343
53	266079510	0	2013	1	3	94.8	0	2.86	456.724	149.134	192.714	392.107
53	266079510	0	2013	1	3	98.7	0	1.9	2360.77	0	145.137	396.59
54	266079510	1	2013	1	4	95.32	0	1.1	456.724	0	177.825	372.523
54	266079510	0	2013	1	4	95.58	0	1.2	1765.75	0	255.16	386.332
54	266079510	0	2013	1	4	98.18	0	0.8	811.953	146.099	123.91	371.617
55	266079510	1	2013	1	6	95.58	6.5	1.2	0	0	63.8791	343.943
55	266079510	0	2013	1	6	98.7	12.75	1.8	2429.34	216.205	54.0032	344.71
55	266079510	0	2013	1	6	98.96	5	1	456.724	233.354	35.4478	345.645
56	266079510	1	2013	1	7	97.14	3.25	3.1	292.303	73.0758	115.98	331.303
56	266079510	0	2013	1	7	98.18	1	2.5	596.537	60.3932	120.123	289.255
56	266079510	0	2013	1	7	96.62	8.5	1.4	1826.9	73.0758	124.133	273.914
57	266079510	1	2013	1	9	96.62	1	2.7	292.303	244.094	130.174	329.014
57	266079510	0	2013	1	9	91.94	15.5	5	0	232.861	117.223	276.658
57	266079510	0	2013	1	9	93.5	2.25	3.3	0	90.8436	327.391	290.097
58	266079510	1	2013	1	11	97.66	0	0.8	1802.55	117.029	78.7537	362.88
58	266079510	0	2013	1	11	96.36	0	2	1826.9	163.293	141.316	377.825
58	266079510	0	2013	1	11	94.02	0.75	5	360.868	111.14	154.878	319.199
59	266079510	1	2013	1	26	93.76	48.25	0.9	1372.2	172.961	61.8952	344.793
59	266079510	0	2013	1	26	100	1.5	1	2398.83	219.729	66.8735	374.905
59	266079510	0	2013	1	26	97.66	21.75	1.6	811.953	154.277	32.7926	296.862
60	266079510	1	2013	1	15	97.66	13	0.8	2784.3	90.8436	138.518	327.401
60	266079510	0	2013	1	15	98.96	5.25	0.4	1491.28	0	93.6695	338.498
60	266079510	0	2013	1	15	97.66	16.5	0.9	0	73.0758	226.113	370.881
62	266079510	1	2013	1	17	97.4	11.75	1.2	1769.36	0	22.7109	338.478
62	266079510	0	2013	1	17	99.74	14.5	0.8	360.868	365.263	193.217	308.564
62	266079510	0	2013	1	17	99.22	4	0.5	2338.43	0	150.82	317.659
63	266079510	1	2013	1	18	99.74	20.25	1.1	0	228.362	87.0342	357.683
63	266079510	0	2013	1	18	97.92	10	1	456.724	66.2819	173.33	367.649
63	266079510	0	2013	1	18	98.96	1.25	0.7	1410.79	43.2401	161.681	318.57
64	266079510	1	2013	1	20	93.76	3	1.8	202.988	196.194	70.5134	348.339
64	266079510	0	2013	1	20	97.14	5	2.7	811.953	176.681	199.105	313.019
64	266079510	0	2013	1	20	95.32	3	2.9	957.405	0	71.1516	332.765
65	266079510	1	2013	1	22	98.7	3.25	1.6	596.537	0	241.957	397.328
65	266079510	0	2013	1	22	99.74	1	0.7	1625.94	136.986	119.76	373.065
65	266079510	0	2013	1	22	99.48	0.75	1.2	787.595	50.7471	167.066	376.018
67	266079510	1	2013	1	28	100	29.25	2.96	596.537	172.961	168.582	358.678
67	266079510	0	2013	1	28	100	38	2.16	2029.88	0	237.028	389.111
67	266079510	0	2013	1	28	100	19.75	2.64	1169.21	46.7685	136.884	373.5
68	266079510	1	2013	1	30	100	1.25	3.64	811.953	195.903	227.598	253.797
68	266079510	0	2013	1	30	100	16.5	5.18	1533.69	0	118.479	290.995
68	266079510	0	2013	1	30	98.7	15.25	3.52	2338.43	0	154.605	245.554
69	266079510	1	2013	1	36	99.74	5.5	1.4	1169.21	55.2558	186.152	327.786
69	266079510	0	2013	1	36	99.22	9.75	0.5	0	46.7685	62.9285	347.057
69	266079510	0	2013	1	36	99.48	12.25	1.2	811.953	40.0965	174.775	311.045
236	266079514	1	2013	1	3	96.62	12.25	1.5	0	453.266	36.2088	170.506
236	266079514	0	2013	1	3	95.84	13.75	2.76	811.953	499.069	131.541	193.385
236	266079514	0	2013	1	3	97.92	37.25	3.12	0	709.984	95.8662	214.476
238	266079514	1	2013	1	5	99.74	18.25	2.86	2545.02	180.226	187.564	117.655
238	266079514	0	2013	1	5	99.48	122.25	2.82	456.724	80.1929	244.389	163.619
238	266079514	0	2013	1	5	88.04	31.25	4.38	241.573	73.0758	186.471	70.4933
239	266079514	1	2013	1	6	99.22	56.75	3.6	0	270.201	102.312	136.664
239	266079514	0	2013	1	6	96.62	9.5	1.8	2007.32	129.913	131.888	116.947
239	266079514	0	2013	1	6	100	109	3.36	888.841	101.143	167.856	175.051
240	266079514	1	2013	1	8	100	51.75	2.3264	2423.43	154.277	155.387	138.071
240	266079514	0	2013	1	8	99.48	55.75	2.48	653.171	46.7685	281.702	164.316
240	266079514	0	2013	1	8	98.44	88	2.78	202.988	342.97	166.279	149.533
242	266079514	1	2013	1	35	100	4	0.9	3235.39	149.134	198.681	125.679
242	266079514	0	2013	1	35	98.44	18.75	0.4	0	86.865	158.694	74.3551
242	266079514	0	2013	1	35	92	35.75	0.21	0	382.321	142.917	80.1694
243	266079514	1	2013	1	1	100	25	3.12	495.292	278.963	206.983	140.944
243	266079514	0	2013	1	1	100	36.25	2.88	533.876	456.373	178.785	170.798
243	266079514	0	2013	1	1	100	5	3.2	1461.52	95.3523	398.906	95.932
244	266079514	1	2013	1	33	97.66	11.5	1	2658.2	161.941	83.4894	82.9398
244	266079514	0	2013	1	33	96.36	26.5	0.4	811.953	123.433	104.961	89.0619
244	266079514	0	2013	1	33	96.88	19	1.4	1763.07	101.143	67.8793	119.393
245	266079514	1	2013	1	31	99.74	13	1.1	241.573	929.658	171.778	32.898
245	266079514	0	2013	1	31	98.96	7	2.2	838.11	470.837	74.7453	73.4608
245	266079514	0	2013	1	31	97.92	7	1.6	0	639.571	233.329	69.1684
246	266079514	1	2013	1	29	94.02	24.25	1.9	241.573	183.754	216.523	42.2952
246	266079514	0	2013	1	29	95.58	17.75	0.7	659.712	521.567	119.855	83.8876
246	266079514	0	2013	1	29	93.24	12.25	2	202.988	898.267	147.519	9.53583
247	266079514	1	2013	1	26	99.74	7	0.8	602.441	116.316	89.6081	82.4946
247	266079514	0	2013	1	26	97.92	31.25	0.6	596.537	204.39	253.097	130.398
247	266079514	0	2013	1	26	96.1	31	0.7	1408.49	83.3366	180.105	88.4093
249	266079514	1	2013	1	21	97.4	40.5	2.78	202.988	234.777	206.444	208.986
249	266079514	0	2013	1	21	96.88	38.25	4.24	0	133.249	124.573	164.104
249	266079514	0	2013	1	21	100	28	3.32	2423.43	479.516	119.963	176.776
250	266079514	1	2013	1	19	92.46	94	1.9	292.303	154.277	46.4928	204.506
250	266079514	0	2013	1	19	94.8	52	3.14	653.171	391.641	160.661	222.652
250	266079514	0	2013	1	19	95.58	50.5	2.22	698.297	40.0965	215.16	183.555
251	266079514	1	2013	1	18	90.64	34.5	0.52	0	0	117.788	198.255
251	266079514	0	2013	1	18	98.44	17.5	0.38	913.448	114.181	127.478	195.41
251	266079514	0	2013	1	18	97.92	91.5	2.9	805.43	113.05	80.2715	202.485
252	266079514	1	2013	1	16	99.74	73.5	3.28	653.171	144.383	139.908	174.571
252	266079514	0	2013	1	16	100	24	0.62	456.724	195.151	128.63	196.59
252	266079514	0	2013	1	16	97.4	47.5	3.7	0	437.142	68.1874	224.153
253	266079514	1	2013	1	15	100	81.5	2.06	533.876	166.772	92.4105	180.614
253	266079514	0	2013	1	15	100	38.25	3.44	241.573	466.424	111.193	213.822
253	266079514	0	2013	1	15	94.02	40.75	3.32	0	225.354	101.323	223.324
254	266079514	1	2013	1	13	100	5	2.94	456.724	195.151	216.708	154.158
254	266079514	0	2013	1	13	97.92	74.5	2.72	602.441	408.679	141.492	124.862
254	266079514	0	2013	1	13	91.68	58.25	1.24	0	80.9704	87.1659	199.923
256	266079514	1	2013	1	10	98.96	96.5	3.94	241.573	288.008	47.9447	225.432
256	266079514	0	2013	1	10	97.66	22.75	3.3	1408.49	347.371	136.869	211.34
256	266079514	0	2013	1	10	98.18	77	3.9	2187.76	422.416	246.328	172.687
349	266079515	1	2013	1	1	96.88	8.75	2.3	241.573	185.168	107.096	62.4231
349	266079515	0	2013	1	1	92.72	6.5	3.1	749.027	0	187.669	108.922
349	266079515	0	2013	1	1	94.8	30.25	3.65	0	0	88.6342	17.3024
351	266079515	1	2013	1	3	95.84	9	4.2	360.868	0	108.828	79.1873
351	266079515	0	2013	1	3	96.1	19.75	2.5	1510.25	140.964	119.146	108.922
351	266079515	0	2013	1	3	93.76	48.75	3	241.573	219.729	81.4915	89.8302
353	266079515	1	2013	1	5	95.58	15.5	2.75	0	184.204	232.988	79.8015
353	266079515	0	2013	1	5	97.66	9	2.95	2187.76	73.0758	126.715	115.745
353	266079515	0	2013	1	5	95.58	12	2.6	811.953	46.7685	125.3	76.5136
355	266079515	1	2013	1	7	98.44	3	3.2	241.573	0	128.648	68.2297
355	266079515	0	2013	1	7	96.88	9	3.8	596.537	172.961	66.932	33.9737
355	266079515	0	2013	1	7	95.58	28.25	2.6	596.537	107.162	123.33	113.113
356	266079515	1	2013	1	8	97.4	4	5.4	957.405	149.134	47.9868	51.0359
356	266079515	0	2013	1	8	98.18	41.75	3.2	360.868	90.2171	166.316	97.4256
356	266079515	0	2013	1	8	98.44	5.75	4.8	596.537	0	111.394	49.6487
357	266079515	1	2013	1	10	98.18	10.25	3.8	360.868	0	147.535	38.9288
357	266079515	0	2013	1	10	96.62	19.25	2.6	0	50.7471	154.621	94.7578
357	266079515	0	2013	1	10	98.44	4.25	2.6	202.988	73.0758	137.385	64.6786
358	266079515	1	2013	1	12	97.4	5	3.56	0	168.306	138.915	14.9025
358	266079515	0	2013	1	12	98.96	35	3.2	241.573	132.564	94.7132	28.9157
358	266079515	0	2013	1	12	96.62	31.5	1.2	1703.09	90.2171	80.7764	6.03705
360	266079515	1	2013	1	14	97.4	0	1.2	2029.88	0	116.169	69.9898
360	266079515	0	2013	1	14	98.7	19	3.4	456.724	46.7685	152.39	119.766
360	266079515	0	2013	1	14	97.92	3.75	3.6	456.724	66.2819	181.262	120.323
362	266079515	1	2013	1	16	99.48	10.25	0.7	2187.76	50.7471	164.427	46.3766
362	266079515	0	2013	1	16	99.74	12	1.2	483.146	287.141	65.0396	69.5874
362	266079515	0	2013	1	16	96.36	39	0.8	405.977	478.528	79.0271	0.703726
363	266079515	1	2013	1	18	98.7	23	1.2	653.171	86.865	88.4713	29.3278
363	266079515	0	2013	1	18	98.7	35.25	0.8	241.573	0	93.5771	76.8085
363	266079515	0	2013	1	18	100	22.5	1.6	360.868	0	76.2947	74.6665
364	266079515	1	2013	1	20	98.18	10.25	1.4	1826.9	43.2401	149.704	32.5388
364	266079515	0	2013	1	20	83.88	61.75	0.8	0	0	87.6587	3.77465
364	266079515	0	2013	1	20	99.22	14	1.4	1981.17	0	65.7495	81.4943
365	266079515	1	2013	1	21	99.48	12.75	1.1	2715.74	46.7685	206.806	51.639
365	266079515	0	2013	1	21	97.14	6.25	1.2	1826.9	130.105	158.615	84.4176
365	266079515	0	2013	1	21	99.74	0.5	0.6	0	0	70.5516	33.3249
366	266079515	1	2013	1	23	96.36	25	1.7	0	554.143	76.3979	28.343
366	266079515	0	2013	1	23	55.8	29	0.2	0	201.046	54.2781	6.76994
366	266079515	0	2013	1	23	98.7	9.5	0.6	360.868	581.607	64.125	11.6196
367	266079515	1	2013	1	25	99.22	15.5	1.4	1623.91	251.167	96.4765	5.42812
367	266079515	0	2013	1	25	99.22	1.75	1.1	1104.26	0	199.349	40.508
367	266079515	0	2013	1	25	99.74	25.5	0.8	1533.69	182.113	88.3683	8.06467
368	266079515	1	2013	1	27	99.74	22	1.3	1510.25	213.057	150.982	16.0483
368	266079515	0	2013	1	27	99.22	9.25	1.8	1826.9	66.2819	161.273	56.689
368	266079515	0	2013	1	27	97.66	19.25	0.9	0	0	146.079	11.5629
369	266079515	1	2013	1	45	99.22	38.5	1.8	805.43	1366.34	0	29.2008
369	266079515	0	2013	1	45	97.14	22.25	1.98	202.988	707.515	229.664	2.38877
369	266079515	0	2013	1	45	95.32	30.5	3.12	360.868	321.34	250.58	44.4939
35	266079516	1	2013	1	1	95.58	4	1.7	0	0	86.2775	189.309
35	266079516	0	2013	1	1	98.7	1	2	360.868	90.2171	96.6395	235.332
35	266079516	0	2013	1	1	96.88	12.75	1	1345.83	0	99.1142	220.643
36	266079516	1	2013	1	2	99.74	2	1.6	0	0	123.425	177.396
36	266079516	0	2013	1	2	97.66	102.667	2	0	73.0758	111.101	185.83
36	266079516	0	2013	1	2	98.44	2.25	2.6	596.537	248.265	127.073	175.235
37	266079516	1	2013	1	4	99.48	1.25	2	0	0	46.5773	193.499
37	266079516	0	2013	1	4	97.92	3.25	3	0	103.633	120.498	180.676
37	266079516	0	2013	1	4	97.14	3	1.2	0	46.7685	161.544	242.639
39	266079516	1	2013	1	6	99.74	13	1.2	2068.47	50.7471	33.4312	167.92
39	266079516	0	2013	1	6	76.6	105	0.1	0	172.961	13.8762	175.506
39	266079516	0	2013	1	6	99.48	4.25	1.8	456.724	174.574	100.453	160.722
40	266079516	1	2013	1	7	100	0.5	2.6	241.573	0	81.0249	142.713
40	266079516	0	2013	1	7	98.18	13.75	1.6	0	251.45	153.349	121.505
40	266079516	0	2013	1	7	97.66	41.25	3.4	0	534.378	59.5218	175.742
41	266079516	1	2013	1	9	100	1.75	2.6	360.868	149.134	70.6128	153.742
41	266079516	0	2013	1	9	99.48	23.25	2.6	360.868	130.314	0	124.394
41	266079516	0	2013	1	9	98.44	23.5	1.6	0	147.252	19.9293	149.455
43	266079516	1	2013	1	12	97.92	4.5	1.8	0	259.825	53.0256	166.926
43	266079516	0	2013	1	12	97.14	2.5	1.8	0	0	18.7133	170.634
43	266079516	0	2013	1	12	100	3.25	2	0	210.883	77.0865	211.866
44	266079516	1	2013	1	14	95.84	0	3.6	202.988	288.4	65.7477	149.389
44	266079516	0	2013	1	14	99.48	4.25	1.6	0	43.2401	130.414	187.491
44	266079516	0	2013	1	14	100	24.75	2	1826.9	90.2171	94.6157	160.58
46	266079516	1	2013	1	16	98.96	4.5	1.7	0	128.332	96.3585	208.71
46	266079516	0	2013	1	16	100	0.5	0.8	0	40.0965	65.3507	183.405
46	266079516	0	2013	1	16	99.22	1.75	2	456.724	0	103.71	202.632
48	266079516	1	2013	1	18	98.44	2.5	4	888.841	289.853	153.556	154.412
48	266079516	0	2013	1	18	98.96	5	1.6	1625.94	186.248	266.511	155.992
48	266079516	0	2013	1	18	98.44	6.75	1.8	202.988	239.351	48.6526	129.125
49	266079516	1	2013	1	19	99.48	9	2.8	1465.12	460.294	90.688	62.1202
49	266079516	0	2013	1	19	98.44	3.75	3.54	292.303	233.354	263.694	81.5936
49	266079516	0	2013	1	19	96.88	13	4	0	127.739	239.217	40.8892
50	266079516	1	2013	1	20	94.02	9.75	1.7	596.537	360.017	218.767	102.013
50	266079516	0	2013	1	20	97.66	4.5	3.6	0	209.528	209.58	83.0456
50	266079516	0	2013	1	20	97.14	4.5	4.2	1053.53	217.748	204.818	143.258
192	266079517	1	2013	1	2	95.06	0	1.5	817.592	0	136.868	259.614
192	266079517	0	2013	1	2	97.14	0	3	653.171	80.9704	120.762	284.69
192	266079517	0	2013	1	2	99.48	0	3	2525.19	0	117.298	270.411
193	266079517	1	2013	1	3	94.8	0	1.9	596.537	0	122.433	274.982
193	266079517	0	2013	1	3	98.18	0	1.2	0	129.913	115.089	266.313
193	266079517	0	2013	1	3	99.48	0	1.2	202.988	431.35	63.1617	277.948
194	266079517	1	2013	1	5	93.5	0	2.6	241.573	187.257	106.996	275.397
194	266079517	0	2013	1	5	99.74	0	2.4	202.988	320.872	115.427	296.381
194	266079517	0	2013	1	5	97.66	0	2.8	1826.9	259.825	133.835	286.113
195	266079517	1	2013	1	6	95.32	2.5	1.1	0	40.0965	174.787	312.385
195	266079517	0	2013	1	6	98.7	0	2.6	405.977	144.383	66.3363	326.583
195	266079517	0	2013	1	6	98.7	0	1.2	292.303	66.2819	76.6496	308.928
199	266079517	1	2013	1	12	95.06	0.75	3.9	0	172.961	180.236	286.083
199	266079517	0	2013	1	12	97.4	3.25	1.3	1826.9	129.913	47.6357	316.864
199	266079517	0	2013	1	12	95.84	0	4.2	456.724	0	163.87	250.032
200	266079517	1	2013	1	14	98.96	1.25	5	241.573	46.7685	104.461	275.114
200	266079517	0	2013	1	14	95.32	5.75	1	0	60.3932	83.6792	329.914
200	266079517	0	2013	1	14	97.14	2.25	2.4	1053.53	345.921	146.563	329.522
201	266079517	1	2013	1	16	99.22	4.25	1.2	0	231.056	80.8557	298.038
201	266079517	0	2013	1	16	96.36	1.75	3.3	1826.9	0	149.618	247.464
201	266079517	0	2013	1	16	96.36	1.25	1.8	0	114.181	92.5169	270.411
202	266079517	1	2013	1	18	91.16	16.5	3.4	0	73.0758	157.504	356.604
202	266079517	0	2013	1	18	97.66	3.75	3.8	360.868	113.05	78.329	304.81
202	266079517	0	2013	1	18	93.24	5.75	3.2	0	116.316	97.7194	402.892
203	266079517	1	2013	1	20	98.18	3.5	1	0	73.0758	79.3769	331.444
203	266079517	0	2013	1	20	97.66	8.75	1.4	2106.79	243.085	26.8414	337.389
203	266079517	0	2013	1	20	95.32	7.75	2	3899.42	234.6	0	366.748
204	266079517	1	2013	1	36	98.96	0.5	1.9	596.537	180.226	124.561	319.798
204	266079517	0	2013	1	36	99.22	2.75	1.7	1351.47	169.437	83.1394	273.72
204	266079517	0	2013	1	36	98.18	1.25	1	596.537	0	206.264	333.182
205	266079517	1	2013	1	34	97.66	2	2.2	0	66.2819	141.9	320.482
205	266079517	0	2013	1	34	100	2.75	1	456.724	0	139.554	265.571
205	266079517	0	2013	1	34	99.74	3.25	0.8	456.724	149.134	143.556	325.432
206	266079517	1	2013	1	32	99.48	30	1.4	360.868	163.293	46.4061	359.252
206	266079517	0	2013	1	32	98.7	9.25	1.1	1904.05	228.216	6.91842	408.978
206	266079517	0	2013	1	32	100	14.25	1.3	0	682.112	131.566	310.065
207	266079517	1	2013	1	30	97.66	5.25	2.5	0	416.523	50.246	370.914
207	266079517	0	2013	1	30	96.1	5	2.4	0	80.9704	108.342	322.264
207	266079517	0	2013	1	30	96.36	8.5	4.5	596.537	132.564	59.5754	398.279
208	266079517	1	2013	1	28	96.1	2	1.4	1649.8	261.084	78.4412	343.031
208	266079517	0	2013	1	28	97.14	3.75	2.8	0	369.155	115.442	298.535
208	266079517	0	2013	1	28	94.54	0.75	3.4	0	172.961	106.677	290.217
209	266079517	1	2013	1	26	97.66	31.75	0.6	2029.88	393.695	0	339.133
209	266079517	0	2013	1	26	98.18	6.5	4.2	2283.62	263.315	69.1488	358.531
209	266079517	0	2013	1	26	95.84	1.75	2.9	1172.82	495.055	79.1377	371.06
210	266079517	1	2013	1	24	98.44	6.75	1.2	698.297	546.967	116.146	279.265
210	266079517	0	2013	1	24	94.02	3.75	1.3	0	128.332	105.391	316.165
210	266079517	0	2013	1	24	93.76	5.5	1.7	0	0	96.6575	234.626
211	266079517	1	2013	1	22	97.14	1.75	3.5	563.857	172.961	73.871	272.131
211	266079517	0	2013	1	22	96.1	5.75	1.6	1268.68	0	44.258	322.512
211	266079517	0	2013	1	22	95.84	1.5	2	0	0	64.0921	237.038
370	266079517	1	2013	1	8	98.7	81.25	2.74	1853.28	0	41.1859	317.063
370	266079517	0	2013	1	8	93.5	54	1.56	0	0	80.9486	297.179
370	266079517	0	2013	1	8	98.96	10.5	5.06	0	60.3932	147.376	267.609
371	266079517	1	2013	1	10	99.48	151.25	0.9	1726.64	263.178	0	311.62
371	266079517	0	2013	1	10	95.58	12.5	3.6	799.526	371.344	23.1239	345.571
371	266079517	0	2013	1	10	98.44	129	3.4	939.87	43.2401	13.814	362.231
97	266079518	1	2013	1	2	97.4	2.5	1.1	0	40.0965	123.855	254.739
97	266079518	0	2013	1	2	98.18	2.75	1.2	0	0	157.923	260.831
97	266079518	0	2013	1	2	100	4.75	1.6	0	184.48	95.4393	304.944
98	266079518	1	2013	1	4	98.7	5	0.9	0	152.771	123.663	278.977
98	266079518	0	2013	1	4	99.74	3.5	1.1	0	46.7685	146.753	250.209
98	266079518	0	2013	1	4	97.66	18.5	0.6	596.537	260.333	9.66292	280.208
99	266079518	1	2013	1	6	97.66	1.25	2.2	0	124.211	56.2494	364.798
99	266079518	0	2013	1	6	98.7	3.75	1	1733.07	377.351	23.9075	388.063
99	266079518	0	2013	1	6	99.74	1.25	1.7	1193.07	0	132.603	326.724
100	266079518	1	2013	1	8	99.74	1	1.6	0	274.103	198.199	245.894
100	266079518	0	2013	1	8	100	6.25	0.8	1014.94	378.967	11.2381	236.071
100	266079518	0	2013	1	8	99.74	0	1.7	495.292	149.134	171.006	274.203
101	266079518	1	2013	1	10	98.44	1.75	2.6	292.303	0	190.843	287.899
101	266079518	0	2013	1	10	97.4	2.75	0.6	241.573	80.9704	125.152	223.734
101	266079518	0	2013	1	10	100	0.5	1.3	533.876	344.286	106.265	220.153
102	266079518	1	2013	1	12	97.66	1.5	3.6	456.724	0	181.741	262.925
102	266079518	0	2013	1	12	99.74	19.75	4.1	0	407.077	78.6795	223.139
102	266079518	0	2013	1	12	100	13.75	3.4	1587.4	0	101.244	239.997
103	266079518	1	2013	1	14	96.88	8	2.72	811.953	246.65	178.752	203.542
103	266079518	0	2013	1	14	98.44	120.5	4.84	0	301.501	143.457	174.082
103	266079518	0	2013	1	14	92.2	150.5	4.72	799.526	444.128	104.261	252.898
104	266079518	1	2013	1	15	99.74	0.25	0.7	202.988	279.339	113.169	311.241
104	266079518	0	2013	1	15	100	1.75	0.9	202.988	134.084	108.513	320.591
104	266079518	0	2013	1	15	99.22	8.25	0.5	596.537	50.7471	45.0584	326.803
105	266079518	1	2013	1	16	97.14	9.5	1.6	1625.94	1072.91	23.8615	359.286
105	266079518	0	2013	1	16	96.88	5	2.7	2219.56	274.296	14.4347	378.918
105	266079518	0	2013	1	16	96.36	23.75	0.9	0	579.275	128.132	324.144
92	266079519	1	2013	1	1	99.74	4.75	0.7	888.841	172.961	157.183	297.269
92	266079519	0	2013	1	1	100	2.25	0.5	202.988	302.873	95.7553	293.884
92	266079519	0	2013	1	1	99.74	1	1.1	0	331.32	78.6466	290.337
657	266079522	1	2014	1	7	94.8	74.5	2.64	0	0	58.298	135.136
657	266079522	0	2014	1	7	91.16	71.75	1.3	0	117.029	47.649	86.8898
657	266079522	0	2014	1	7	93.76	83	1.24	0	50.7471	70.7982	187.02
658	266079522	1	2014	1	9	91.42	11.75	3.92	596.537	0	173.157	135.957
658	266079522	0	2014	1	9	92.98	66	1.96	0	131.718	68.5745	86.1034
658	266079522	0	2014	1	9	92.72	16.25	3.04	811.953	117.029	44.4446	107.228
659	266079522	1	2014	1	11	98.96	10.25	4.94	0	280.961	41.0489	61.9388
659	266079522	0	2014	1	11	97.66	76.75	1.68	596.537	0	50.4669	115.816
659	266079522	0	2014	1	11	98.7	82.75	0.76	0	379.493	122.267	95.1144
660	266079522	1	2014	1	12	97.92	29.25	2.54	202.988	274.103	69.5481	55.1874
660	266079522	0	2014	1	12	97.66	45	3.02	0	377.207	135.853	59.966
660	266079522	0	2014	1	12	98.44	89.75	1.94	0	80.9704	85.1407	80.4092
661	266079522	1	2014	1	13	99.22	26.25	2.15	0	239.435	91.9635	108.189
661	266079522	0	2014	1	13	95.84	12	0.75	241.573	46.7685	124.92	121.641
661	266079522	0	2014	1	13	98.18	4.75	0.5	0	197.286	134.722	107.331
662	266079522	1	2014	1	14	98.96	83.25	1.28	0	106.003	84.6432	128.711
662	266079522	0	2014	1	14	99.48	97.5	2.34	0	343.953	45.6356	82.8494
662	266079522	0	2014	1	14	98.18	32.5	1.52	0	117.029	158.795	117.644
663	266079522	1	2014	1	15	88.3	35	3.38	241.573	187.623	87.806	169.965
663	266079522	0	2014	1	15	92.2	9.75	2.48	0	237.091	113.618	175.929
663	266079522	0	2014	1	15	91.16	24.75	2.16	0	163.293	118.447	206.101
664	266079522	1	2014	1	17	98.7	114.75	1.96	596.537	0	30.6761	55.8089
664	266079522	0	2014	1	17	99.22	119.5	0.46	444.561	291.449	16.0529	26.8018
664	266079522	0	2014	1	17	97.4	99.5	2.44	1865.48	0	23.9084	23.9472
665	266079522	1	2014	1	19	98.18	76.25	1.38	0	55.2558	117.667	108.309
665	266079522	0	2014	1	19	99.48	7	2.62	596.537	101.143	118.828	66.2977
665	266079522	0	2014	1	19	99.48	34.75	2.08	1769.36	0	49.3201	100.257
666	266079522	1	2014	1	20	99.48	4.5	1.4	0	286.311	53.2229	90.3744
666	266079522	0	2014	1	20	98.44	52.5	1.6	0	103.633	92.429	57.1815
666	266079522	0	2014	1	20	98.7	58.5	1.28	0	173.153	99.3848	57.8874
667	266079522	1	2014	1	21	99.48	95	1.38	0	50.7471	80.3335	90.1849
667	266079522	0	2014	1	21	96.1	46.25	1.96	0	43.2401	125.86	52.4079
667	266079522	0	2014	1	21	94.8	90.5	0.6	0	0	62.2037	43.4647
668	266079522	1	2014	1	23	94.28	74.25	1.22	596.537	174.958	73.7973	184.415
668	266079522	0	2014	1	23	98.18	78	2.2	0	265.268	74.2206	242.555
668	266079522	0	2014	1	23	97.14	152.5	1.36	495.292	0	93.7043	163.777
669	266079522	1	2014	1	25	98.96	23	1.04	0	90.8436	152.19	62.6693
669	266079522	0	2014	1	25	98.44	124.5	0.5	0	146.152	78.1066	94.7629
669	266079522	0	2014	1	25	98.18	9.75	3.7	0	73.0758	126.745	29.6542
670	266079522	1	2014	1	27	97.92	15.25	0.1	811.953	46.7685	88.6617	222.072
670	266079522	0	2014	1	27	97.66	16.5	1.35	456.724	0	132.144	189.35
670	266079522	0	2014	1	27	96.88	13	2.5	241.573	420.042	308.912	209.551
708	266079523	1	2014	1	2	94.02	19.5	0.4	1700.79	46.7685	130.815	186.336
708	266079523	0	2014	1	2	92.72	49	1.82	292.303	176.681	265.772	131.332
708	266079523	0	2014	1	2	89.34	47.5	2.3	653.171	0	127.042	138.512
709	266079523	1	2014	1	4	92.72	22.25	1.3	202.988	208.403	193.655	189.402
709	266079523	0	2014	1	4	91.94	68.75	1.3	0	256.297	152.916	230.284
709	266079523	0	2014	1	4	87.78	21	1.4	0	229.327	84.7172	175.021
710	266079523	1	2014	1	5	89.08	60.75	1.8	2264.65	0	156.399	167.262
710	266079523	0	2014	1	5	85.7	33.75	2.14	1559.85	0	132.272	157.983
710	266079523	0	2014	1	5	96.88	36.5	0.52	2163.42	60.3932	181.626	163.994
711	266079523	1	2014	1	7	87.78	83.75	2.76	0	0	228.801	208.921
711	266079523	0	2014	1	7	91.16	28.75	1.74	799.526	189.231	149.387	171.71
711	266079523	0	2014	1	7	97.14	54.5	2.18	0	249.624	131.186	202.668
713	266079523	1	2014	1	9	95.32	20.75	1.26	292.303	0	88.7122	50.4549
713	266079523	0	2014	1	9	97.66	19.75	1.08	1928.39	0	34.6715	58.7834
713	266079523	0	2014	1	9	96.36	99	1.46	2365.9	119.844	37.9221	75.3226
714	266079523	1	2014	1	10	96.1	68.5	1.76	811.953	156.399	101.529	78.0807
714	266079523	0	2014	1	10	96.36	78.5	0.78	0	266.948	34.7285	129.632
714	266079523	0	2014	1	10	98.96	26.75	1.14	2638.85	66.2819	73.2525	73.7949
715	266079523	1	2014	1	12	98.44	74.75	1.04	292.303	0	136.896	176.182
715	266079523	0	2014	1	12	97.14	106.5	0.9	1434.65	159.941	180.462	139.452
715	266079523	0	2014	1	12	95.32	27.5	0.56	292.303	0	178.612	155.793
717	266079523	1	2014	1	14	97.14	108.75	2.02	563.857	55.2558	148.873	113.022
717	266079523	0	2014	1	14	88.56	83.75	0.32	1091.83	221.929	133.686	119.445
717	266079523	0	2014	1	14	73.74	116.5	1.2	0	114.181	41.1673	96.5926
718	266079523	1	2014	1	15	97.14	19.75	1.1	0	0	12.1742	67.9436
718	266079523	0	2014	1	15	95.84	74.75	0.4	3921.25	743.881	103.066	114.492
718	266079523	0	2014	1	15	92.2	87.25	0.36	0	109.522	65.7055	69.5544
720	266079523	1	2014	1	17	92.46	105.5	1.82	596.537	0	114.167	79.3211
720	266079523	0	2014	1	17	95.32	37.75	4.68	241.573	299.349	101.356	53.2979
720	266079523	0	2014	1	17	97.4	34.75	1.52	817.592	0	132.282	56.5966
721	266079523	1	2014	1	19	96.1	21	1.7	241.573	116.316	79.6126	97.146
721	266079523	0	2014	1	19	92.46	51	0.1	838.11	50.7471	30.4166	115.386
721	266079523	0	2014	1	19	94.02	18.75	1.82	202.988	235.999	130.311	108.045
722	266079523	1	2014	1	21	90.38	97	1.74	292.303	0	191.402	59.5813
722	266079523	0	2014	1	21	94.8	86.25	2.28	1765.75	336.237	126.694	54.0729
722	266079523	0	2014	1	21	81.28	42.25	0.9	1172.82	55.2558	23.8615	107.121
723	266079523	1	2014	1	22	87.78	52	0.6	817.592	242.979	90.6458	67.7864
723	266079523	0	2014	1	22	97.4	45.75	0.2	360.868	154.277	160.955	59.455
723	266079523	0	2014	1	22	96.88	30.25	2.24	241.573	0	71.6117	81.8773
724	266079523	1	2014	1	23	95.06	47.5	0.52	799.526	46.7685	53.7308	108.718
724	266079523	0	2014	1	23	97.14	61.5	0.46	1169.21	153.147	228.997	145.125
724	266079523	0	2014	1	23	91.42	61.75	1.12	405.977	174.219	12.1742	114.11
725	266079523	1	2014	1	25	96.36	91.25	1.54	811.953	239.242	141.952	68.6239
725	266079523	0	2014	1	25	97.4	33.5	2.4	1410.79	220.184	94.9422	102.518
725	266079523	0	2014	1	25	85.7	90.5	1.28	3592.65	325.936	0	115.045
808	266079524	1	2014	1	2	96.1	27.5	0.8	360.868	73.0758	84.2565	402.403
808	266079524	0	2014	1	2	91.42	43	1.6	811.953	43.2401	54.5113	356.812
808	266079524	0	2014	1	2	95.32	11.5	1.6	0	163.919	59.8672	366.354
809	266079524	1	2014	1	4	96.62	15.5	1.2	0	151.89	133.176	420.125
809	266079524	0	2014	1	4	91.16	44	1.4	0	149.134	57.4089	367.236
809	266079524	0	2014	1	4	89.08	20.5	0.8	0	360.681	47.6895	455.512
810	266079524	1	2014	1	6	90.38	13.5	1	0	124.211	81.9873	429.2
810	266079524	0	2014	1	6	92.2	51	1.2	563.857	0	49.2933	425.973
810	266079524	0	2014	1	6	92.2	22.5	1.2	405.977	131.718	92.316	413.995
811	266079524	1	2014	1	8	94.8	16	2.2	596.537	66.2819	173.469	466.757
811	266079524	0	2014	1	8	90.12	61.25	1	1826.9	678.651	19.8231	451.557
811	266079524	0	2014	1	8	92.2	15.75	1	0	106.378	53.1405	489.383
813	266079524	1	2014	1	12	89.86	62.25	1.2	241.573	83.3366	71.4848	426.96
813	266079524	0	2014	1	12	93.76	21	2.4	838.11	0	97.7275	444.339
813	266079524	0	2014	1	12	94.02	9	1.2	1408.49	73.0758	57.6616	432.488
814	266079524	1	2014	1	14	93.5	34.5	0.6	1268.68	150.61	36.1623	453.853
814	266079524	0	2014	1	14	95.06	18.25	1.6	2931.15	226.443	25.2857	421.559
814	266079524	0	2014	1	14	93.76	16.25	2	456.724	284.19	68.9347	475.269
815	266079524	1	2014	1	18	94.28	31.75	3.4	241.573	124.211	67.7002	352.859
815	266079524	0	2014	1	18	95.84	12	1.8	0	101.143	98.3123	335.679
815	266079524	0	2014	1	18	96.1	29	1.2	456.724	204.39	54.0832	308.838
816	266079524	1	2014	1	3	91.94	32.75	0.8	0	43.2401	44.5273	438.709
816	266079524	0	2014	1	3	96.36	11.25	1.4	0	55.2558	56.1476	398.96
816	266079524	0	2014	1	3	95.06	10.75	0.2	0	0	73.1143	441.758
817	266079524	1	2014	1	5	92.46	61	1.8	202.988	109.522	46.0593	417.61
817	266079524	0	2014	1	5	88.56	18	0.8	596.537	66.2819	103.055	462.879
817	266079524	0	2014	1	5	93.76	11.25	0.4	0	0	108.404	451.057
818	266079524	1	2014	1	7	93.5	11.5	2	805.43	0	154.553	406.926
818	266079524	0	2014	1	7	90.64	29.5	0.4	602.441	154.277	78.9867	408.019
818	266079524	0	2014	1	7	94.8	42	1.2	1530.08	174.574	21.4951	436.061
819	266079524	1	2014	1	1	92.72	13.5	1.2	241.573	126.675	137.621	388.011
819	266079524	0	2014	1	1	95.58	14	2.2	1870.85	43.2401	72.0402	335.213
819	266079524	0	2014	1	1	91.68	48.5	2	1169.21	128.332	87.6229	345.874
820	266079524	1	2014	1	9	96.36	56.25	1.2	0	446.472	10.0241	460.826
820	266079524	0	2014	1	9	93.76	50.5	1.8	0	446.305	25.2857	418.63
820	266079524	0	2014	1	9	96.1	45.5	0.2	1053.26	0	48.193	414.314
821	266079524	1	2014	1	11	90.38	35.5	1.8	456.724	573.986	0	430.617
821	266079524	0	2014	1	11	95.58	18	1	0	195.903	82.0055	423.203
821	266079524	0	2014	1	11	93.5	22.75	0.6	0	80.9704	36.8087	407.961
822	266079524	1	2014	1	13	88.3	16.75	1.4	0	223.9	21.6201	442.201
822	266079524	0	2014	1	13	94.8	34.75	1.8	1414.13	0	107.215	432.641
822	266079524	0	2014	1	13	95.58	19.75	1	360.868	101.143	59.1091	440.984
823	266079524	1	2014	1	15	96.62	24	0.8	1826.9	201.633	46.8142	340.574
823	266079524	0	2014	1	15	92.2	35.5	2.6	456.724	250.277	58.5102	312.415
823	266079524	0	2014	1	15	94.8	40.75	1	1014.94	0	58.2134	366.044
824	266079524	1	2014	1	17	83.88	67	1.8	1712.97	199.881	37.2836	432.609
824	266079524	0	2014	1	17	94.8	22.75	0	202.988	0	71.2198	439.586
824	266079524	0	2014	1	17	94.02	31.75	0.6	0	103.633	69.4841	438.622
550	266079526	1	2014	1	2	92.72	15.75	1.2	0	46.7685	60.1873	90.7522
550	266079526	0	2014	1	2	92.2	34.25	0.8	0	294.802	42.0578	79.7661
550	266079526	0	2014	1	2	90.64	11.5	0.3	1041.33	310.15	56.4376	72.7369
551	266079526	1	2014	1	3	97.14	4.75	1.64	1274.32	253.735	132.99	76.1272
551	266079526	0	2014	1	3	97.14	8.5	1	241.573	164.928	323.311	54.0092
551	266079526	0	2014	1	3	91.68	18.25	0.5	1530.08	43.2401	158.628	80.1423
552	266079526	1	2014	1	4	90.64	34	1.6	0	147.252	49.7346	62.8166
552	266079526	0	2014	1	4	100	12.5	0.6	1169.21	40.0965	59.3634	38.8338
552	266079526	0	2014	1	4	99.48	11	2	360.868	139.358	106.916	51.1926
554	266079526	1	2014	1	6	98.18	31.75	2	0	0	164.141	75.3968
554	266079526	0	2014	1	6	91.16	60.25	1	495.292	40.0965	105.352	129.674
554	266079526	0	2014	1	6	94.8	32.75	0.1	0	210.012	179.84	87.074
862	266079527	1	2014	1	4	97.66	69.75	1.56	1169.21	275.717	118.765	85.7071
862	266079527	0	2014	1	4	95.06	35.25	0.52	990.6	501.298	0	103.833
862	266079527	0	2014	1	4	89.08	178.25	0	1826.9	255.137	62.9383	39.2099
863	266079527	1	2014	1	5	95.32	26.25	0.15	292.303	743.358	35.3852	71.1717
863	266079527	0	2014	1	5	97.92	141.25	1	901.285	350.042	54.9628	29.827
863	266079527	0	2014	1	5	94.02	38.5	0.35	6953.23	449.228	63.1267	49.4797
864	266079527	1	2014	1	7	97.92	103.75	2.16	596.537	318.974	106.767	98.6557
864	266079527	0	2014	1	7	94.02	53.5	0.7	2236.97	512.593	32.4781	126.077
864	266079527	0	2014	1	7	93.5	75	1.68	1169.21	90.8436	68.099	87.4638
865	266079527	1	2014	1	8	88.82	46.75	2.62	0	93.9872	75.9074	74.3402
865	266079527	0	2014	1	8	87.26	18.25	2.18	202.988	95.3523	72.7753	88.934
865	266079527	0	2014	1	8	94.02	52.3333	3.4	0	113.172	151.114	30.3319
866	266079527	1	2014	1	9	96.88	85.5	1.56	0	230.402	108.914	91.3543
866	266079527	0	2014	1	9	95.58	70.5	0.4	456.724	376.854	57.5262	104.246
866	266079527	0	2014	1	9	97.14	35.75	0.3	653.171	420.242	47.084	116.617
867	266079527	1	2014	1	10	95.58	45.25	0.4	360.868	418.405	78.1685	55.9666
867	266079527	0	2014	1	10	92.98	52.25	1.52	1509.98	598.746	75.7192	107.456
867	266079527	0	2014	1	10	97.14	30.75	1.82	1410.79	203.389	54.0199	98.0886
868	266079527	1	2014	1	11	94.54	27.5	0.2	456.724	527.312	32.4781	48.6602
868	266079527	0	2014	1	11	89.34	90.75	0.2	0	119.844	81.527	3.32245
868	266079527	0	2014	1	11	95.32	10.5	1.7	596.537	241.053	30.1997	62.3861
869	266079527	1	2014	1	12	87.78	29.5	1.98	241.573	815.444	34.2464	107.961
869	266079527	0	2014	1	12	89.08	78	1.94	1408.49	212.688	55.2775	150.64
869	266079527	0	2014	1	12	91.94	40	0.88	6237.13	614.598	67.7192	159.204
870	266079527	1	2014	1	13	97.92	20.25	0.71	1706.7	562.463	121.374	137.791
870	266079527	0	2014	1	13	88.56	15.75	0	1867.51	1010.33	32.4781	110.323
870	266079527	0	2014	1	13	94.54	11.5	1.3	202.988	578.995	144.043	149.305
872	266079527	1	2014	1	16	92.2	65	2.8	4487.12	1140.87	68.0826	91.4367
872	266079527	0	2014	1	16	85.96	3	0	945.475	590.916	0	113.093
872	266079527	0	2014	1	16	92.46	35	0.92	1169.21	456.377	47.4683	67.1213
873	266079527	1	2014	1	17	96.62	13	0.04	1345.83	441.858	36.5379	195.255
873	266079527	0	2014	1	17	98.44	32.25	1.55	202.988	345.329	15.0983	157.649
873	266079527	0	2014	1	17	99.22	45.75	1.2	0	721.31	87.0693	175.449
874	266079527	1	2014	1	18	98.7	44	0.86	0	218.198	55.2579	194.892
874	266079527	0	2014	1	18	95.58	28.75	1.7	1509.98	214.315	124.128	170.75
874	266079527	0	2014	1	18	91.68	46.75	1.24	1053.53	522.13	40.5616	197.837
875	266079527	1	2014	1	19	93.24	44	2.18	1981.17	375.578	45.8104	83.3008
875	266079527	0	2014	1	19	91.68	43.5	1.36	1169.21	124.211	74.5684	87.9686
875	266079527	0	2014	1	19	87.26	90.5	1.48	749.027	605.179	30.4166	34.6245
876	266079527	1	2014	1	20	98.7	47.5	2.26	241.573	360.017	120.179	122.486
876	266079527	0	2014	1	20	98.7	76	1.24	360.868	182.113	86.1512	73.578
876	266079527	0	2014	1	20	98.7	23	1.64	952.015	66.2819	142.071	100.33
877	266079527	1	2014	1	22	98.7	13	1.2	2565.81	600.148	33.141	175.598
877	266079527	0	2014	1	22	96.88	55.75	0.3	360.868	396.647	106.049	136.904
877	266079527	0	2014	1	22	86.74	17	0	0	321.273	26.8414	200.92
744	266079528	1	2014	1	2	93.5	59.75	3.42	241.573	60.3932	75.962	94.14
744	266079528	0	2014	1	2	94.8	91	2.4	0	253.346	262.972	132.228
744	266079528	0	2014	1	2	93.5	93	1.54	0	149.134	217.792	141.317
745	266079528	1	2014	1	3	96.1	149.25	6.08	0	55.2558	109.952	174.281
745	266079528	0	2014	1	3	96.36	126.75	3.34	0	95.3523	107.94	117.603
745	266079528	0	2014	1	3	86.74	80.25	1.44	0	0	57.8799	131.519
746	266079528	1	2014	1	6	93.76	18	1.2	1826.9	149.134	40.357	125.922
746	266079528	0	2014	1	6	94.28	48.75	2.4	292.303	301.958	68.382	186.734
746	266079528	0	2014	1	6	96.62	47.75	2.2	584.607	200.815	80.0741	182.063
747	266079528	1	2014	1	8	95.58	23.25	1.3	1713.24	119.844	22.0389	156.978
747	266079528	0	2014	1	8	94.28	66.5	1.95	0	73.0758	126.666	186.175
747	266079528	0	2014	1	8	95.58	42.5	1.55	0	0	258.199	132.817
748	266079528	1	2014	1	9	93.76	38.75	1.28	596.537	231.056	92.7716	169.049
748	266079528	0	2014	1	9	91.42	35.25	2.82	0	316.91	73.2316	133.254
748	266079528	0	2014	1	9	93.5	81.75	1.14	0	0	150.732	176.519
749	266079528	1	2014	1	10	96.36	36.25	1.2	202.988	172.961	50.8283	156.978
749	266079528	0	2014	1	10	99.22	96.25	2.64	2338.43	0	63.417	162.994
749	266079528	0	2014	1	10	97.4	97.5	0.32	0	43.2401	93.0196	187.057
750	266079528	1	2014	1	12	88.82	38.25	3.58	647.55	668.075	157.654	241.682
750	266079528	0	2014	1	12	90.38	81	3.24	0	73.0758	158.973	191.829
750	266079528	0	2014	1	12	95.84	31.5	1.36	0	329.505	96.4444	237.061
751	266079528	1	2014	1	14	91.68	86	2.28	653.171	185.168	38.6205	204.787
751	266079528	0	2014	1	14	94.54	34.25	2.38	2124.84	700.245	8.11953	170.835
751	266079528	0	2014	1	14	92.2	49.25	1.06	292.303	935.119	0	233.511
752	266079528	1	2014	1	16	88.82	77.75	4.72	0	115.649	33.6154	158.294
752	266079528	0	2014	1	16	97.4	63.5	0.94	202.988	478.502	168.258	186.787
752	266079528	0	2014	1	16	83.62	77.5	2.32	0	151.237	95.1768	123.26
753	266079528	1	2014	1	18	95.58	84.5	1.12	1826.9	106.378	65.5034	113.945
753	266079528	0	2014	1	18	92.98	68.75	0.76	0	0	124.657	66.0384
753	266079528	0	2014	1	18	97.4	89	3.46	653.171	331.248	86.632	149.972
754	266079528	1	2014	1	20	95.32	30.75	0.84	0	199.881	319.379	240.803
754	266079528	0	2014	1	20	95.84	30.5	1.6	456.724	783.585	124.228	219.306
754	266079528	0	2014	1	20	92.2	34.75	3.26	533.876	370.478	122.256	242.646
755	266079528	1	2014	1	21	81.28	75	3.76	698.297	0	224.258	169.557
755	266079528	0	2014	1	21	87.78	57.5	1.7	811.953	271.677	165.15	215.632
755	266079528	0	2014	1	21	89.08	117	2.32	0	336.494	132.901	174.408
756	266079528	1	2014	1	22	93.76	40.5	3.28	2025.37	172.961	111.043	160.714
[truncated: 791 more rows]
